# Supplementary material for: Integrative Role of 14-3-3ε in Sleep Regulation
Source: Int J Mol Sci. 2021 Sep 9;22(18):9748. doi: 10.3390/ijms22189748 (PMC8467329; doi:10.3390/ijms22189748)
Supplement: Supplementary file 1 [file ijms-22-09748-s001.zip]

Archive with 6 entries (6 files):
- actual Cq values in real-time PCR.xlsx
- Figure S1.pdf
- Table S1  Circadiam Rhythm and Period under DD condition  20210722.xlsx
- Table S2  Transcriptome different gene list at ZT2 and ZT14 20210722.pdf
- Table S3  Neurotransmitter metabolism gene from Go onology analysis of transcriptome 20210722.pdf
- Table S4  Primer sequence 20210722.xlsx
