# Supplementary material for: Integrative Role of 14-3-3ε in Sleep Regulation
Source: Int J Mol Sci. 2021 Sep 9;22(18):9748. doi: 10.3390/ijms22189748 (PMC8467329; doi:10.3390/ijms22189748)
Supplement: Supplementary file 1 [file ijms-22-09748-s001.zip › actual Cq values in real-time PCR.xlsx]

## Sheet: Figure2A
Biological repeat	Time	genotype	gene	technical repeat	Cq value
I	ZT2	w1118	RP49	1	18.6343
				2	18.6519
				3	18.7251
			PDF	1	19.7799
				2	19.8442
				3	19.826
		14-3-3εEP3578	RP49	1	18.4566
				2	18.583
				3	18.5867
			PDF	1	20.5218
				2	20.5205
				3	20.5526
	ZT14	w1118	RP49	1	18.3463
				2	18.3468
				3	18.34
			PDF	1	19.5667
				2	19.5355
				3	19.3931
		14-3-3εEP3578	RP49	1	18.1728
				2	18.0471
				3	18.1956
			PDF	1	20.5388
				2	20.6109
				3	20.5672
II	ZT2	w1118	RP49	1	18.3888
				2	18.3634
				3	18.3829
			PDF	1	18.9711
				2	18.923
				3	18.8633
		14-3-3εEP3578	RP49	1	17.8888
				2	17.8068
				3	17.9313
			PDF	1	19.3981
				2	19.4289
				3	19.4753
	ZT14	w1118	RP49	1	17.8725
				2	17.9228
				3	17.9781
			PDF	1	18.5433
				2	18.5383
				3	18.4813
		14-3-3εEP3578	RP49	1	17.8201
				2	17.6517
				3	17.6884
			PDF	1	19.3963
				2	19.673
				3	19.438
III	ZT2	w1118	RP49	1	17.7965
				2	17.8236
				3	17.88
			PDF	1	18.6004
				2	18.6835
				3	18.5452
		14-3-3εEP3578	RP49	1	17.7688
				2	17.9212
				3	17.9201
			PDF	1	19.4188
				2	19.5342
				3	19.588
	ZT14	w1118	RP49	1	17.8753
				2	17.8328
				3	17.8472
			PDF	1	18.5545
				2	18.5555
				3	18.5401
		14-3-3εEP3578	RP49	1	17.9173
				2	17.9015
				3	17.9704
			PDF	1	19.5784
				2	19.5544
				3	19.9234

## Sheet: Figure4B
Biological repeat	genotype	gene	technical repeat	Cq value
I	w1118	RP49	1	14.9269
			2	15.1377
			3	14.9324
		PDF	1	18.0172
			2	18.2114
			3	18.1562
	Ubx1	RP49	1	15.094
			2	15.1473
			3	15.0544
		PDF	1	18.7833
			2	18.9589
			3	18.8133
II	w1118	RP49	1	15.0334
			2	14.8788
			3	14.7947
		PDF	1	18.2081
			2	18.059
			3	18.036
	Ubx1	RP49	1	15.0477
			2	14.9296
			3	15.0384
		PDF	1	18.814
			2	19.0117
			3	18.943
III	w1118	RP49	1	14.9746
			2	15.0323
			3	15.1707
		PDF	1	17.9715
			2	17.9654
			3	18.1228
	Ubx1	RP49	1	14.8865
			2	14.9185
			3	14.8773
		PDF	1	18.6579
			2	18.9188
			3	18.8269

## Sheet: Figure4C
Biological repeat	genotype	gene	technical repeat	Cq value
I	w1118	RP49	1	17.9032
			2	17.9243
			3	17.9542
		Ubx	1	27.1824
			2	26.9274
			3	27.0381
	14-3-3εEP3578	RP49	1	17.6045
			2	17.6597
			3	17.6908
		Ubx	1	27.5626
			2	27.6908
			3	27.8153
II	w1118	RP49	1	17.5431
			2	17.5932
			3	17.5194
		Ubx	1	26.8098
			2	26.6548
			3	26.8833
	14-3-3εEP3578	RP49	1	17.5898
			2	17.5178
			3	17.5852
		Ubx	1	27.5751
			2	27.3613
			3	27.3241
III	w1118	RP49	1	16.8368
			2	16.965
			3	16.8092
		Ubx	1	26.55
			2	26.5494
			3	26.6495
	14-3-3εEP3578	RP49	1	16.6645
			2	16.6581
			3	16.7252
		Ubx	1	27.3021
			2	27.2314
			3	27.1803

## Sheet: Figure7C-D
Biological repeat	Time	genotype	gene	technical repeat	Cq value
I	ZT2	w1118	RP49	1	15.7634
				2	15.9146
				3	15.7621
			PDF	1	20.5928
				2	20.5401
				3	20.5443
		14-3-3εEP3578/+	RP49	1	15.1896
				2	14.9792
				3	15.2102
			PDF	1	21.1594
				2	21.2266
				3	21.3455
		Dop1R1KO	RP49	1	14.9099
				2	14.8644
				3	14.8415
			PDF	1	18.3132
				2	18.3023
				3	18.2789
		14-3-3εEP3578/Dop1R1KO	RP49	1	15.3565
				2	15.2631
				3	15.4663
			PDF	1	19.4972
				2	19.7316
				3	19.4416
		OambMI11478	RP49	1	16.3715
				2	16.4594
				3	16.4951
			PDF	1	19.7007
				2	19.9164
				3	19.7602
		14-3-3εEP3578/OambMI11478	RP49	1	15.8339
				2	15.6668
				3	15.7812
			PDF	1	20.0783
				2	20.1607
				3	20.0255
	ZT14	w1118	RP49	1	15.7634
				2	15.9146
				3	15.7621
			PDF	1	20.5928
				2	20.5401
				3	20.5443
		14-3-3εEP3578/+	RP49	1	15.3602
				2	15.2156
				3	15.4438
			PDF	1	21.2379
				2	21.6227
				3	21.3107
		Dop1R1KO	RP49	1	14.7698
				2	14.3717
				3	14.3421
			PDF	1	17.9259
				2	17.8107
				3	17.8538
		14-3-3εEP3578/Dop1R1KO	RP49	1	15.2428
				2	15.2212
				3	15.9313
			PDF	1	19.0928
				2	19.1857
				3	19.3125
		OambMI11478	RP49	1	16.7561
				2	16.6606
				3	16.9308
			PDF	1	20.0579
				2	20.1505
				3	20.0126
		14-3-3εEP3578/OambMI11478	RP49	1	16.1478
				2	16.2806
				3	16.4777
			PDF	1	20.4743
				2	20.8959
				3	20.5303
II	ZT2	w1118	RP49	1	15.3927
				2	15.4475
				3	15.3476
			PDF	1	19.3703
				2	19.4217
				3	19.2707
		14-3-3εEP3578/+	RP49	1	15.2631
				2	15.2445
				3	15.3687
			PDF	1	20.8309
				2	20.9785
				3	20.9259
		Dop1R1KO	RP49	1	15.1626
				2	15.313
				3	15.1344
			PDF	1	18.6863
				2	18.5564
				3	18.6736
		14-3-3εEP3578/Dop1R1KO	RP49	1	14.9284
				2	14.7554
				3	14.8436
			PDF	1	18.7024
				2	18.9207
				3	18.8301
		OambMI11478	RP49	1	16.0834
				2	16.2006
				3	16.1058
			PDF	1	19.4715
				2	19.4526
				3	19.6581
		14-3-3εEP3578/OambMI11478	RP49	1	16.2348
				2	16.6787
				3	16.1393
			PDF	1	20.3913
				2	20.4555
				3	20.2604
	ZT14	w1118	RP49	1	15.2944
				2	15.3505
				3	15.2456
			PDF	1	19.2372
				2	19.4176
				3	19.1946
		14-3-3εEP3578/+	RP49	1	14.8038
				2	14.8909
				3	14.9707
			PDF	1	20.1659
				2	20.4319
				3	20.0911
		Dop1R1KO	RP49	1	15.135
				2	15.275
				3	15.2953
			PDF	1	18.7765
				2	18.5816
				3	18.585
		14-3-3εEP3578/Dop1R1KO	RP49	1	15.2517
				2	15.2394
				3	15.3063
			PDF	1	18.9894
				2	19.011
				3	19.038
		OambMI11478	RP49	1	15.5858
				2	15.6103
				3	15.6929
			PDF	1	19.9732
				2	19.9334
				3	20.1786
		14-3-3εEP3578/OambMI11478	RP49	1	15.3616
				2	15.385
				3	15.9307
			PDF	1	20.6887
				2	20.7108
				3	20.6482
III	ZT2	w1118	RP49	1	15.8028
				2	15.8981
				3	15.7058
			PDF	1	18.7695
				2	18.762
				3	18.872
		14-3-3εEP3578/+	RP49	1	15.7869
				2	15.9737
				3	15.928
			PDF	1	19.6246
				2	19.6819
				3	19.811
		Dop1R1KO	RP49	1	15.5598
				2	15.712
				3	15.5867
			PDF	1	18.2422
				2	18.2525
				3	18.3632
		14-3-3εEP3578/Dop1R1KO	RP49	1	15.967
				2	15.8527
				3	15.9068
			PDF	1	18.8212
				2	18.9875
				3	18.8697
		OambMI11478	RP49	1	15.7767
				2	15.6134
				3	15.9409
			PDF	1	18.2416
				2	18.333
				3	18.4655
		14-3-3εEP3578/OambMI11478	RP49	1	15.4323
				2	15.7729
				3	15.1435
			PDF	1	18.7525
				2	18.7343
				3	18.7164
	ZT14	w1118	RP49	1	15.9263
				2	15.7946
				3	15.7983
			PDF	1	18.8694
				2	18.9495
				3	18.9257
		14-3-3εEP3578/+	RP49	1	13.9271
				2	13.9337
				3	13.9067
			PDF	1	17.664
				2	17.9263
				3	17.6516
		Dop1R1KO	RP49	1	15.4968
				2	15.6102
				3	15.607
			PDF	1	18.2913
				2	18.1719
				3	18.3415
		14-3-3εEP3578/Dop1R1KO	RP49	1	15.7903
				2	15.805
				3	15.9353
			PDF	1	18.9093
				2	18.9506
				3	18.9473
		OambMI11478	RP49	1	15.7499
				2	15.5185
				3	15.762
			PDF	1	20.2864
				2	20.2695
				3	20.3153
		14-3-3εEP3578/OambMI11478	RP49	1	15.2876
				2	15.0745
				3	15.2788
			PDF	1	20.5023
				2	20.6308
				3	20.7104
