# Supplementary material for: Integrative Role of 14-3-3ε in Sleep Regulation
Source: Int J Mol Sci. 2021 Sep 9;22(18):9748. doi: 10.3390/ijms22189748 (PMC8467329; doi:10.3390/ijms22189748)
Supplement: Supplementary file 1 [file ijms-22-09748-s001.zip › Table S1 Circadiam Rhythm and Period under DD condition 20210722.xlsx]

## Sheet: Sheet1
Table1. Circadiam Rhythm and Period under DD condition
Genotype	NumTotal (n)	NumRhythmic (n)	Rhythmic (%)	Period±SEM (h)
w1118	48	48	100	23.5±0.38
14-3-3εEP3578	48	47	97.9n.s.	23.7±0.26
14-3-3εj2B10/+	48	45	95.7n.s.	23.7±0.07
w1118 as control. Statistical differences were measured using unpaired Student's t-test; n.s. indicates no significant difference.
