# Supplementary material for: Integrative Role of 14-3-3ε in Sleep Regulation
Source: Int J Mol Sci. 2021 Sep 9;22(18):9748. doi: 10.3390/ijms22189748 (PMC8467329; doi:10.3390/ijms22189748)
Supplement: Supplementary file 1 [file ijms-22-09748-s001.zip › Table S2 Transcriptome different gene list at ZT2 and ZT14 20210722.pdf]

| #ID         | gene_name  | w <sup>1118</sup> | ZT2_Count 14-3-3ε <sup>EP3578</sup> | ZT2_Count w <sup>1118</sup> | ZT2_FPKM 14-3-3ε <sup>EP3578</sup> | ZT2_FPKM | FDR     | log2FC | regulated |
|-------------|------------|-------------------|-------------------------------------|-----------------------------|------------------------------------|----------|---------|--------|-----------|
| FBgn0029881 | pigs       | 3571              | 2480                                | 33.4021                     | 21.9852                            | 0.0020   | -0.5271 | down   |           |
| FBgn0043470 | lambdaTry  | 0                 | 18                                  | 0.0000                      | 1.6104                             | 0.0062   | 4.1478  | up     |           |
| FBgn0011770 | Gip        | 1165              | 1800                                | 98.0954                     | 152.6030                           | 0.0001   | 0.6259  | up     |           |
| FBgn0039325 | CG10560    | 479               | 2079                                | 23.5643                     | 97.9310                            | 0.0000   | 2.1140  | up     |           |
| FBgn0036571 | Strump     | 829               | 471                                 | 13.7628                     | 7.9442                             | 0.0000   | -0.8156 | down   |           |
| FBgn0039073 | CG4408     | 380               | 770                                 | 16.3082                     | 34.0199                            | 0.0000   | 1.0155  | up     |           |
| FBgn0040465 | Dlip3      | 362               | 219                                 | 17.5822                     | 10.8525                            | 0.0022   | -0.7236 | down   |           |
| FBgn0037375 | kat-60L1   | 1262              | 861                                 | 34.8507                     | 25.3095                            | 0.0030   | -0.5524 | down   |           |
| FBgn0036105 | Blos4      | 120               | 38                                  | 13.1248                     | 4.9212                             | 0.0000   | -1.6329 | down   |           |
| FBgn0038739 | CG4686     | 259               | 466                                 | 24.7334                     | 45.7935                            | 0.0000   | 0.8434  | up     |           |
| FBgn0030296 | CG15196    | 84                | 12                                  | 3.6581                      | 0.5398                             | 0.0000   | -2.7031 | down   |           |
| FBgn0037713 | CG16790    | 797               | 1443                                | 73.1106                     | 109.1563                           | 0.0000   | 0.8542  | up     |           |
| FBgn0250871 | pot        | 922               | 1354                                | 13.4312                     | 20.0011                            | 0.0025   | 0.5525  | up     |           |
| FBgn0087007 | bbg        | 1092              | 718                                 | 13.2763                     | 9.4390                             | 0.0006   | -0.6055 | down   |           |
| FBgn0032726 | CG10621    | 497               | 737                                 | 34.9561                     | 53.8525                            | 0.0083   | 0.5661  | up     |           |
| FBgn0033820 | CG4716     | 13778             | 9527                                | 1669.2534                   | 1148.5406                          | 0.0017   | -0.5336 | down   |           |
| FBgn0030674 | HUWE1      | 4492              | 3169                                | 16.6340                     | 12.2500                            | 0.0049   | -0.5045 | down   |           |
| FBgn0259145 | CG42260    | 1463              | 586                                 | 11.0041                     | 4.4129                             | 0.0000   | -1.3197 | down   |           |
| FBgn0038840 | Grik       | 584               | 352                                 | 11.5918                     | 7.3038                             | 0.0001   | -0.7300 | down   |           |
| FBgn0011722 | Tig        | 2113              | 1421                                | 17.5206                     | 12.5103                            | 0.0005   | -0.5734 | down   |           |
| FBgn0039543 | CROT       | 1316              | 433                                 | 39.6921                     | 13.5055                            | 0.0000   | -1.6027 | down   |           |
| FBgn0016013 | Faa        | 550               | 1166                                | 28.4124                     | 61.0294                            | 0.0000   | 1.0812  | up     |           |
| FBgn0085261 | CG34232    | 6                 | 45                                  | 0.9082                      | 5.8680                             | 0.0000   | 2.7018  | up     |           |
| FBgn0027584 | CG4757     | 715               | 1339                                | 25.8686                     | 48.1855                            | 0.0000   | 0.9028  | up     |           |
| FBgn0069969 | CG40498    | 2090              | 3497                                | 63.9237                     | 84.7319                            | 0.0000   | 0.7410  | up     |           |
| FBgn0029879 | APC7       | 66                | 15                                  | 2.0122                      | 0.4650                             | 0.0000   | -2.0622 | down   |           |
| FBgn0032264 | Lip4       | 993               | 354                                 | 44.7439                     | 14.6226                            | 0.0000   | -1.4866 | down   |           |
| FBgn0037687 | CG8132     | 283               | 457                                 | 22.1731                     | 36.6154                            | 0.0016   | 0.6880  | up     |           |
| FBgn0031432 | Cyp309a1   | 1339              | 576                                 | 49.4685                     | 22.4648                            | 0.0000   | -1.2168 | down   |           |
| FBgn0034140 | Lst        | 861               | 1947                                | 53.8918                     | 126.0016                           | 0.0000   | 1.1748  | up     |           |
| FBgn0038302 | CG4210     | 100               | 40                                  | 16.1480                     | 6.4326                             | 0.0011   | -1.3004 | down   |           |
| FBgn0013279 | Hsp70Bc    | 108               | 15                                  | 2.7173                      | 0.4098                             | 0.0000   | -2.7637 | down   |           |
| FBgn0034480 | CG16898    | 733               | 352                                 | 41.8774                     | 19.3457                            | 0.0000   | -1.0573 | down   |           |
| FBgn0034639 | CG15673    | 201               | 373                                 | 14.5938                     | 27.9041                            | 0.0000   | 0.8871  | up     |           |
| FBgn0030313 | Reep1l     | 101               | 0                                   | 9.7972                      | 0.0000                             | 0.0000   | -6.5689 | down   |           |
| FBgn0013772 | Cyp6a8     | 539               | 1711                                | 19.6073                     | 61.2606                            | 0.0000   | 1.6632  | up     |           |
| FBgn0037537 | CG2767     | 2602              | 3774                                | 130.5800                    | 193.6440                           | 0.0014   | 0.5349  | up     |           |
| FBgn0051183 | CG31183    | 1097              | 599                                 | 12.8976                     | 7.3403                             | 0.0000   | -0.8731 | down   |           |
| FBgn0019928 | Ser8       | 0                 | 21                                  | 0.0000                      | 2.2876                             | 0.0008   | 4.3585  | up     |           |
| FBgn0034745 | CG4329     | 13                | 52                                  | 0.2169                      | 0.8491                             | 0.0013   | 1.9136  | up     |           |
| FBgn0033982 | Cyp317a1   | 168               | 329                                 | 4.6326                      | 7.1020                             | 0.0000   | 0.9638  | up     |           |
| FBgn0035106 | rno        | 1808              | 1110                                | 8.4906                      | 5.1096                             | 0.0000   | -0.7046 | down   |           |
| FBgn0036022 | CG8329     | 19179             | 47716                               | 2013.0600                   | 5161.1300                          | 0.0000   | 1.3136  | up     |           |
| FBgn0063497 | GstE3      | 901               | 1882                                | 116.8840                    | 252.7220                           | 0.0000   | 1.0604  | up     |           |
| FBgn0259209 | Mlp60A     | 1680              | 2561                                | 275.9287                    | 506.1219                           | 0.0001   | 0.6066  | up     |           |
| FBgn0029924 | CG4586     | 64                | 182                                 | 1.9597                      | 6.1148                             | 0.0000   | 1.4909  | up     |           |
| FBgn0052037 | CG32037    | 76                | 23                                  | 3.1529                      | 0.9272                             | 0.0002   | -1.6800 | down   |           |
| FBgn0015570 | alpha-Est2 | 986               | 561                                 | 33.0890                     | 18.9776                            | 0.0000   | -0.8137 | down   |           |
| FBgn0039686 | CG15506    | 38                | 183                                 | 1.7571                      | 8.1761                             | 0.0000   | 2.2346  | up     |           |
| FBgn0037081 | barc       | 1237              | 1835                                | 34.1792                     | 50.4108                            | 0.0008   | 0.5672  | up     |           |
| FBgn0029837 | Tsp5D      | 959               | 636                                 | 37.6702                     | 24.4933                            | 0.0014   | -0.5930 | down   |           |
| FBgn0031080 | CG12655    | 349               | 43                                  | 61.8349                     | 7.8641                             | 0.0000   | -2.9909 | down   |           |
| FBgn0037630 | Ir85a      | 59                | 17                                  | 1.8936                      | 0.5659                             | 0.0016   | -1.7340 | down   |           |
| FBgn0028999 | nerfin-1   | 18                | 0                                   | 0.2871                      | 0.0000                             | 0.0061   | -4.1491 | down   |           |
| FBgn0032066 | LManIII    | 3                 | 48                                  | 0.0821                      | 0.9766                             | 0.0000   | 3.5888  | up     |           |
| FBgn0050263 | stum       | 147               | 271                                 | 2.1418                      | 4.4290                             | 0.0003   | 0.8763  | up     |           |
| FBgn0035665 | Jon65Aiii  | 0                 | 21                                  | 0.0000                      | 2.1813                             | 0.0008   | 4.3585  | up     |           |
| FBgn0267398 | Yeti       | 942               | 1531                                | 87.2676                     | 128.8519                           | 0.0000   | 0.6987  | up     |           |
| FBgn0086558 | Ubi-p5E    | 9270              | 3548                                | 270.2286                    | 102.7222                           | 0.0000   | -1.3866 | down   |           |
| FBgn0023178 | Pdf        | 1736              | 1192                                | 239.7200                    | 170.6630                           | 0.0022   | -0.5433 | down   |           |
| FBgn0033397 | Cyp4p3     | 199               | 93                                  | 8.1636                      | 3.7173                             | 0.0000   | -1.0900 | down   |           |
| FBgn0036121 | CG6310     | 21                | 91                                  | 3.2439                      | 14.0486                            | 0.0000   | 2.0591  | up     |           |
| FBgn0014859 | Hr38       | 278               | 654                                 | 2.4137                      | 5.5864                             | 0.0000   | 1.2297  | up     |           |
| FBgn0036381 | CG8745     | 2473              | 852                                 | 69.7948                     | 23.7752                            | 0.0000   | -1.5375 | down   |           |
| FBgn0051955 | CG31955    | 68                | 5                                   | 10.5314                     | 0.4866                             | 0.0000   | -3.5083 | down   |           |
| FBgn0038339 | CG6118     | 0                 | 63                                  | 0.0162                      | 1.0796                             | 0.0000   | 5.8958  | up     |           |
| FBgn0037171 | CG14459    | 35                | 1                                   | 1.9756                      | 0.0540                             | 0.0000   | -4.1204 | down   |           |
| FBgn0034356 | Pepck2     | 91                | 1187                                | 2.3294                      | 33.0486                            | 0.0000   | 3.6883  | up     |           |
| FBgn0036752 | Adgf-A     | 819               | 518                                 | 21.3694                     | 14.2762                            | 0.0002   | -0.6612 | down   |           |
| FBgn0036254 | CG5645     | 165               | 88                                  | 3.2072                      | 1.6674                             | 0.0083   | -0.9001 | down   |           |
| FBgn0032647 | CG15143    | 25                | 69                                  | 0.3993                      | 1.0377                             | 0.0074   | 1.4249  | up     |           |
| FBgn0032973 | CG6675     | 87                | 211                                 | 4.5836                      | 11.0993                            | 0.0000   | 1.2664  | up     |           |
| FBgn0038142 | CheA87a    | 447               | 233                                 | 69.3445                     | 35.6689                            | 0.0000   | -0.9381 | down   |           |
| FBgn0040323 | GNBP1      | 560               | 259                                 | 20.7615                     | 9.8100                             | 0.0000   | -1.1106 | down   |           |
| FBgn0050088 | CG30088    | 109               | 12                                  | 8.8748                      | 1.0107                             | 0.0000   | -3.0748 | down   |           |
| FBgn0036619 | Cpr72Ec    | 3455              | 13779                               | 130.0090                    | 538.1560                           | 0.0000   | 1.9940  | up     |           |
| FBgn0014342 | mia        | 158               | 58                                  | 4.9366                      | 1.7987                             | 0.0000   | -1.4304 | down   |           |
| FBgn0033942 | Cpr51A     | 106               | 2                                   | 16.6952                     | 0.3233                             | 0.0000   | -5.1227 | down   |           |
| FBgn0030607 | dob        | 601               | 1011                                | 21.5797                     | 37.8347                            | 0.0000   | 0.7480  | up     |           |
| FBgn0000044 | Act57B     | 9841              | 21555                               | 454.5960                    | 1043.7500                          | 0.0000   | 1.1297  | up     |           |
| FBgn0032817 | CG10631    | 2552              | 1733                                | 12.2745                     | 8.5344                             | 0.0007   | -0.5594 | down   |           |
| FBgn0035890 | CG13667    | 139               | 62                                  | 5.2405                      | 2.3448                             | 0.0004   | -1.1524 | down   |           |
| FBgn0042175 | CG18858    | 266               | 461                                 | 9.9854                      | 17.5401                            | 0.0001   | 0.7895  | up     |           |
| FBgn0032900 | CG14401    | 560               | 325                                 | 39.9338                     | 23.1150                            | 0.0000   | -0.7843 | down   |           |
| FBgn0035550 | CG11349    | 64                | 0                                   | 2.3946                      | 0.0000                             | 0.0000   | -5.9195 | down   |           |
| FBgn0032281 | CG17107    | 50                | 266                                 | 21.9546                     | 117.7070                           | 0.0000   | 2.3852  | up     |           |
| FBgn0033158 | CG12164    | 2                 | 39                                  | 0.1477                      | 1.8281                             | 0.0000   | 3.7027  | up     |           |
| FBgn0039685 | Obp99b     | 11468             | 4824                                | 2495.6428                   | 1069.7111                          | 0.0000   | -1.2505 | down   |           |
| FBgn0262870 | axo        | 2012              | 1303                                | 16.0562                     | 10.3561                            | 0.0000   | -0.6277 | down   |           |
| FBgn0000046 | Act87E     | 1555              | 2559                                | 77.0535                     | 127.7096                           | 0.0000   | 0.7169  | up     |           |
| FBgn0032144 | CG17633    | 0                 | 37                                  | 0.0528                      | 2.0902                             | 0.0000   | 5.1449  | up     |           |

|             |           |       |       |           |           |        |         |      |
|-------------|-----------|-------|-------|-----------|-----------|--------|---------|------|
| FBgn0262150 | CG42876   | 128   | 3     | 6.3643    | 0.1179    | 0.0000 | -4.9862 | down |
| FBgn0259236 | comm3     | 378   | 233   | 12.4940   | 8.4875    | 0.0035 | -0.6968 | down |
| FBgn0039722 | Capa      | 1685  | 978   | 234.4730  | 138.0200  | 0.0000 | -0.7855 | down |
| FBgn0034436 | CG11961   | 711   | 472   | 16.0654   | 10.8973   | 0.0042 | -0.5913 | down |
| FBgn0039161 | CG13606   | 434   | 241   | 37.3402   | 23.0170   | 0.0000 | -0.8471 | down |
| FBgn0038056 | CG5961    | 572   | 294   | 27.0117   | 14.1886   | 0.0000 | -0.9590 | down |
| FBgn0042127 | CG18789   | 45    | 7     | 2.5250    | 0.3998    | 0.0001 | -2.5136 | down |
| FBgn0038292 | CG3987    | 14    | 85    | 0.7299    | 4.2519    | 0.0000 | 2.5121  | up   |
| FBgn0003863 | alphaTry  | 0     | 32    | 0.0000    | 3.9149    | 0.0000 | 4.9418  | up   |
| FBgn0035941 | CG13313   | 44    | 4     | 2.5389    | 0.2439    | 0.0000 | -3.1519 | down |
| FBgn0034069 | CG8401    | 653   | 397   | 53.5466   | 34.6411   | 0.0001 | -0.7178 | down |
| FBgn0013813 | Dhc98D    | 41    | 391   | 0.1787    | 1.6760    | 0.0000 | 3.2188  | up   |
| FBgn0032181 | CG13133   | 25    | 69    | 1.6867    | 4.8799    | 0.0074 | 1.4249  | up   |
| FBgn0034329 | BomS1     | 689   | 346   | 371.8690  | 189.0760  | 0.0000 | -0.9928 | down |
| FBgn0033186 | CG1602    | 60    | 149   | 2.0809    | 5.1723    | 0.0000 | 1.2957  | up   |
| FBgn0031528 | CG15412   | 200   | 326   | 7.9338    | 13.3549   | 0.0071 | 0.7005  | up   |
| FBgn0052029 | Cpr66D    | 579   | 102   | 11.2172   | 3.2664    | 0.0000 | -2.4939 | down |
| FBgn0042178 | Apl       | 69    | 237   | 1.2079    | 4.1856    | 0.0000 | 1.7631  | up   |
| FBgn0038682 | CG5835    | 265   | 540   | 14.7145   | 30.6424   | 0.0000 | 1.0227  | up   |
| FBgn0033205 | CG2064    | 313   | 182   | 20.3255   | 11.8867   | 0.0013 | -0.7800 | down |
| FBgn0035382 | Or63a     | 139   | 67    | 5.8196    | 2.8522    | 0.0027 | -1.0423 | down |
| FBgn0003082 | phr       | 51    | 816   | 2.0232    | 31.2445   | 0.0000 | 3.9705  | up   |
| FBgn0053548 | SmydA-8   | 3133  | 4697  | 121.0377  | 199.5461  | 0.0001 | 0.5827  | up   |
| FBgn0029826 | CG6041    | 365   | 559   | 8.7375    | 8.6414    | 0.0056 | 0.6121  | up   |
| FBgn0036725 | CG18265   | 384   | 225   | 2.5527    | 1.3988    | 0.0004 | -0.7697 | down |
| FBgn0004629 | Cys       | 3980  | 7266  | 1259.7400 | 2343.2700 | 0.0000 | 0.8669  | up   |
| FBgn0039752 | CG15530   | 2     | 26    | 0.0889    | 0.8346    | 0.0025 | 3.1369  | up   |
| FBgn0053329 | Sp212     | 476   | 735   | 20.3062   | 32.3395   | 0.0013 | 0.6243  | up   |
| FBgn0036145 | CG7607    | 662   | 356   | 87.8140   | 46.6865   | 0.0000 | -0.8943 | down |
| FBgn0038465 | Irc       | 2947  | 1833  | 83.1667   | 51.6056   | 0.0000 | -0.6861 | down |
| FBgn0034629 | Acox57D-d | 262   | 86    | 7.6934    | 2.5724    | 0.0000 | -1.5965 | down |
| FBgn0033518 | Prx2540-2 | 611   | 329   | 55.9104   | 31.6071   | 0.0000 | -0.8923 | down |
| FBgn0036290 | CG10638   | 609   | 1241  | 38.4565   | 78.5246   | 0.0000 | 1.0244  | up   |
| FBgn0259682 | Jabba     | 4895  | 1875  | 212.6663  | 79.0560   | 0.0000 | -1.3852 | down |
| FBgn0002571 | Mal-A3    | 0     | 45    | 0.0353    | 1.7118    | 0.0000 | 5.4201  | up   |
| FBgn0035766 | eco       | 678   | 1745  | 11.5899   | 30.2146   | 0.0000 | 1.3611  | up   |
| FBgn0033065 | Cyp6w1    | 4210  | 11105 | 156.1575  | 407.8802  | 0.0000 | 1.3977  | up   |
| FBgn0010403 | Obp83b    | 42    | 120   | 10.5004   | 29.8506   | 0.0000 | 1.4896  | up   |
| FBgn0015035 | Cyp4e3    | 805   | 151   | 31.6097   | 5.8607    | 0.0000 | -2.4075 | down |
| FBgn0053138 | AGBE      | 2379  | 3438  | 68.2157   | 104.0690  | 0.0019 | 0.5297  | up   |
| FBgn0037607 | CG8036    | 9407  | 15378 | 281.2952  | 487.9850  | 0.0000 | 0.7077  | up   |
| FBgn0000500 | Dsk       | 1675  | 940   | 355.9130  | 201.0830  | 0.0000 | -0.8340 | down |
| FBgn0023458 | Rben-3A   | 6815  | 4757  | 38.1702   | 28.0174   | 0.0025 | -0.5199 | down |
| FBgn0040349 | CG3699    | 1002  | 3155  | 101.2510  | 330.7170  | 0.0000 | 1.6524  | up   |
| FBgn0034564 | CG9344    | 44    | 103   | 15.1596   | 34.2083   | 0.0030 | 1.2059  | up   |
| FBgn0031542 | CG15414   | 202   | 109   | 10.2177   | 5.5671    | 0.0026 | -0.8849 | down |
| FBgn0028983 | Spn55B    | 433   | 165   | 23.2713   | 9.3056    | 0.0000 | -1.3874 | down |
| FBgn0037030 | CG3288    | 31    | 1     | 2.7071    | 0.1171    | 0.0000 | -3.9508 | down |
| FBgn0038160 | CG9759    | 790   | 275   | 53.1840   | 17.5701   | 0.0000 | -1.5201 | down |
| FBgn0033387 | CG8008    | 513   | 853   | 13.2791   | 21.2922   | 0.0000 | 0.7310  | up   |
| FBgn0039925 | Kif3C     | 483   | 858   | 5.9615    | 8.6065    | 0.0000 | 0.8262  | up   |
| FBgn0023507 | D2hgdh    | 4283  | 9349  | 133.6825  | 309.4173  | 0.0000 | 1.1247  | up   |
| FBgn0004795 | retn      | 860   | 1245  | 12.5901   | 21.5887   | 0.0064 | 0.5318  | up   |
| FBgn0034606 | ASPP      | 1380  | 2011  | 17.8510   | 26.8826   | 0.0019 | 0.5416  | up   |
| FBgn0032266 | CG18302   | 990   | 658   | 32.2935   | 20.7179   | 0.0015 | -0.5899 | down |
| FBgn0013348 | TpnC41C   | 156   | 418   | 16.6014   | 46.6829   | 0.0000 | 1.4144  | up   |
| FBgn0038981 | CG5346    | 787   | 1203  | 24.7115   | 39.3614   | 0.0004 | 0.6102  | up   |
| FBgn0024289 | Sodh-1    | 4090  | 6767  | 262.4660  | 464.5393  | 0.0000 | 0.7249  | up   |
| FBgn0033067 | CG11211   | 1437  | 3332  | 287.7640  | 658.9130  | 0.0000 | 1.2114  | up   |
| FBgn0054054 | CG34054   | 159   | 50    | 34.0196   | 10.6587   | 0.0000 | -1.6494 | down |
| FBgn0040211 | hgo       | 1068  | 1645  | 51.7054   | 81.8205   | 0.0001 | 0.6213  | up   |
| FBgn0034660 | Loxl2     | 272   | 467   | 10.9446   | 19.5408   | 0.0001 | 0.7761  | up   |
| FBgn0010038 | KifD2     | 35    | 110   | 4.5847    | 14.4564   | 0.0000 | 1.6211  | up   |
| FBgn0043783 | CG32444   | 6859  | 3364  | 367.7370  | 186.7000  | 0.0000 | -1.0289 | down |
| FBgn0263780 | CG17684   | 722   | 441   | 11.6896   | 6.2590    | 0.0001 | -0.7112 | down |
| FBgn0264489 | CG43897   | 8295  | 13006 | 199.6826  | 303.4444  | 0.0000 | 0.6475  | up   |
| FBgn0030300 | SK1       | 283   | 450   | 7.3879    | 11.9499   | 0.0033 | 0.6658  | up   |
| FBgn0037930 | CG14715   | 194   | 76    | 29.9678   | 11.8881   | 0.0000 | -1.3410 | down |
| FBgn0042177 | Arts      | 703   | 387   | 11.7133   | 6.4994    | 0.0000 | -0.8607 | down |
| FBgn0034162 | CG6426    | 4090  | 2867  | 656.4420  | 471.0250  | 0.0034 | -0.5137 | down |
| FBgn0035207 | Herc4     | 3658  | 5961  | 63.1895   | 106.0335  | 0.0000 | 0.7030  | up   |
| FBgn0033574 | Spn47C    | 456   | 1002  | 22.0263   | 44.9291   | 0.0000 | 1.1326  | up   |
| FBgn0261041 | stj       | 7172  | 4018  | 75.2686   | 42.4242   | 0.0000 | -0.8371 | down |
| FBgn0040732 | CG16926   | 3396  | 902   | 286.6340  | 72.8977   | 0.0000 | -1.9127 | down |
| FBgn0027655 | htt       | 3157  | 1528  | 29.1928   | 19.8468   | 0.0000 | -1.0477 | down |
| FBgn0053105 | p24-2     | 6     | 1161  | 0.1396    | 61.1201   | 0.0000 | 7.3584  | up   |
| FBgn0031367 | c-cup     | 29    | 0     | 2.8343    | 0.0000    | 0.0000 | -4.8060 | down |
| FBgn0086698 | frtz      | 322   | 502   | 5.6364    | 9.1527    | 0.0043 | 0.6376  | up   |
| FBgn0027548 | nito      | 642   | 935   | 10.0404   | 15.2462   | 0.0094 | 0.5403  | up   |
| FBgn0050083 | CG30083   | 27    | 87    | 2.6179    | 7.6579    | 0.0000 | 1.6481  | up   |
| FBgn0013812 | Dhc93AB   | 274   | 131   | 1.1125    | 0.5496    | 0.0000 | -1.0598 | down |
| FBgn0036877 | CG9452    | 50    | 143   | 2.0309    | 5.9065    | 0.0000 | 1.4948  | up   |
| FBgn0052726 | CG32726   | 665   | 418   | 784.1781  | 481.4256  | 0.0004 | -0.6698 | down |
| FBgn0085256 | CG34227   | 933   | 1527  | 268.6460  | 452.2960  | 0.0000 | 0.7088  | up   |
| FBgn0033999 | CG8093    | 0     | 25    | 0.0000    | 1.5630    | 0.0001 | 4.5988  | up   |
| FBgn0000053 | Gart      | 1571  | 3402  | 26.8525   | 54.0616   | 0.0000 | 1.1128  | up   |
| FBgn0027620 | Acf       | 678   | 163   | 7.7388    | 1.8397    | 0.0000 | -2.0505 | down |
| FBgn0067779 | dbf       | 935   | 641   | 19.5040   | 8.9281    | 0.0080 | -0.5452 | down |
| FBgn0034471 | Obp56e    | 512   | 1385  | 123.2282  | 332.3696  | 0.0000 | 1.4324  | up   |
| FBgn0051036 | CG31036   | 282   | 582   | 5.1029    | 10.8986   | 0.0000 | 1.0412  | up   |
| FBgn0001128 | Gpdh1     | 17469 | 11513 | 693.3923  | 458.3391  | 0.0001 | -0.6028 | down |
| FBgn0034808 | CG9896    | 807   | 1205  | 24.4828   | 36.1885   | 0.0014 | 0.5764  | up   |

|             |          |       |       |           |           |        |         |      |
|-------------|----------|-------|-------|-----------|-----------|--------|---------|------|
| FBgn0000047 | Act88F   | 38    | 198   | 1.7534    | 9.6438    | 0.0000 | 2.3477  | up   |
| FBgn0040364 | CG11378  | 1539  | 668   | 85.3192   | 39.0547   | 0.0000 | -1.2041 | down |
| FBgn0085209 | CG34180  | 65    | 144   | 37.4562   | 80.7981   | 0.0004 | 1.1333  | up   |
| FBgn0004797 | mdy      | 1197  | 736   | 40.6398   | 25.7333   | 0.0000 | -0.7022 | down |
| FBgn0035725 | Mis12    | 74    | 16    | 7.8113    | 1.7110    | 0.0000 | -2.1377 | down |
| FBgn0030600 | hiw      | 5945  | 3629  | 21.9381   | 14.1450   | 0.0000 | -0.7133 | down |
| FBgn0036837 | CG18135  | 13097 | 8025  | 289.7549  | 174.9522  | 0.0000 | -0.7079 | down |
| FBgn0033354 | FANCI    | 176   | 25    | 2.8490    | 0.3866    | 0.0000 | -2.7649 | down |
| FBgn0029821 | CG4020   | 1     | 21    | 0.0756    | 0.8535    | 0.0084 | 3.4099  | up   |
| FBgn0038702 | CG3739   | 0     | 39    | 0.0000    | 1.8069    | 0.0000 | 5.2188  | up   |
| FBgn0031375 | erm      | 291   | 451   | 6.2188    | 10.2520   | 0.0088 | 0.6289  | up   |
| FBgn0015039 | Cyp9b2   | 3027  | 4651  | 122.0580  | 190.9370  | 0.0000 | 0.6181  | up   |
| FBgn0036757 | Ir75a    | 272   | 7     | 9.4362    | 0.2470    | 0.0000 | -5.0808 | down |
| FBgn0031805 | NepI4    | 247   | 113   | 7.3740    | 3.5597    | 0.0000 | -1.1221 | down |
| FBgn0260793 | 2nit     | 2433  | 1664  | 15.2284   | 9.7697    | 0.0011 | -0.5491 | down |
| FBgn0040817 | CG14132  | 311   | 517   | 28.4673   | 46.9600   | 0.0002 | 0.7299  | up   |
| FBgn0002543 | robo2    | 356   | 198   | 4.6614    | 3.8703    | 0.0001 | -0.8442 | down |
| FBgn0031169 | CG1494   | 172   | 14    | 2.0865    | 0.1765    | 0.0000 | -3.5224 | down |
| FBgn0033204 | CG2065   | 262   | 671   | 16.8974   | 44.1138   | 0.0000 | 1.3518  | up   |
| FBgn0025583 | BomS2    | 1911  | 380   | 1072.7200 | 211.1330  | 0.0000 | -2.3283 | down |
| FBgn0038820 | CG4000   | 3087  | 1300  | 253.0850  | 118.0500  | 0.0000 | -1.2483 | down |
| FBgn0032507 | CG9377   | 586   | 1361  | 41.5984   | 98.7628   | 0.0000 | 1.2128  | up   |
| FBgn0035258 | CG13931  | 10    | 68    | 1.4580    | 10.3575   | 0.0000 | 2.6395  | up   |
| FBgn0044050 | Ilp3     | 88    | 13    | 9.9453    | 1.5206    | 0.0000 | -2.6631 | down |
| FBgn0086348 | se       | 2219  | 1531  | 248.4800  | 176.0520  | 0.0021 | -0.5365 | down |
| FBgn0046114 | Gclm     | 1803  | 1031  | 108.5884  | 66.6925   | 0.0000 | -0.8071 | down |
| FBgn0034599 | hng1     | 115   | 213   | 7.8870    | 15.1687   | 0.0019 | 0.8817  | up   |
| FBgn0036289 | CG10657  | 96    | 187   | 4.2537    | 8.3993    | 0.0012 | 0.9528  | up   |
| FBgn0035205 | Ctr9     | 1659  | 3950  | 25.7396   | 63.1953   | 0.0000 | 1.2497  | up   |
| FBgn0025814 | Mgstl    | 1434  | 989   | 218.7045  | 155.4129  | 0.0040 | -0.5369 | down |
| FBgn0030187 | lpod     | 98    | 11    | 5.3911    | 0.6275    | 0.0000 | -3.0377 | down |
| FBgn0033636 | tou      | 4493  | 3099  | 31.5812   | 27.8281   | 0.0012 | -0.5371 | down |
| FBgn0052698 | CARPB    | 1134  | 548   | 26.1728   | 5.6728    | 0.0000 | -1.0491 | down |
| FBgn0000163 | baz      | 2981  | 1731  | 16.6409   | 11.4804   | 0.0000 | -0.7852 | down |
| FBgn0000527 | e        | 802   | 521   | 16.6858   | 11.2427   | 0.0010 | -0.6226 | down |
| FBgn0033926 | Arc1     | 10925 | 7491  | 284.3240  | 194.2460  | 0.0008 | -0.5457 | down |
| FBgn0032189 | Ripalpha | 142   | 271   | 8.0634    | 14.6028   | 0.0001 | 0.9259  | up   |
| FBgn0036024 | CG18180  | 11    | 57    | 1.1045    | 5.7146    | 0.0000 | 2.2646  | up   |
| FBgn0036862 | Gbs-76A  | 3382  | 1912  | 53.5519   | 27.6448   | 0.0000 | -0.8238 | down |
| FBgn0040606 | CG6503   | 7491  | 4875  | 6672.3200 | 4166.9403 | 0.0000 | -0.6210 | down |
| FBgn0037845 | CG14694  | 232   | 108   | 13.2133   | 6.4561    | 0.0000 | -1.0968 | down |
| FBgn0051778 | CG31778  | 925   | 589   | 65.5724   | 44.4857   | 0.0002 | -0.6516 | down |
| FBgn0034931 | CG2812   | 118   | 213   | 6.8662    | 13.0262   | 0.0040 | 0.8449  | up   |
| FBgn0034407 | DptB     | 9     | 53    | 3.3854    | 18.4973   | 0.0000 | 2.4228  | up   |
| FBgn0039068 | CG13827  | 35    | 112   | 3.2737    | 9.6703    | 0.0000 | 1.6469  | up   |
| FBgn0012042 | AttA     | 111   | 345   | 10.5965   | 33.4233   | 0.0000 | 1.6253  | up   |
| FBgn0037292 | plh      | 88    | 251   | 11.9645   | 40.0002   | 0.0000 | 1.4994  | up   |
| FBgn0036589 | CG13067  | 149   | 67    | 27.0082   | 12.8077   | 0.0003 | -1.1418 | down |
| FBgn0035670 | CG10472  | 24    | 184   | 2.3717    | 18.4327   | 0.0000 | 2.8824  | up   |
| FBgn0085485 | CG34456  | 11    | 199   | 2.2663    | 38.2055   | 0.0000 | 0.4091  | up   |
| FBgn0004102 | oc       | 703   | 1049  | 9.3839    | 13.2156   | 0.0021 | 0.5753  | up   |
| FBgn0032699 | CG10383  | 448   | 768   | 10.1345   | 17.4833   | 0.0000 | 0.7748  | up   |
| FBgn0028920 | CG8997   | 8     | 70    | 0.5071    | 6.6169    | 0.0000 | 2.9680  | up   |
| FBgn0040256 | Ugt35C1  | 629   | 1572  | 28.1477   | 69.3495   | 0.0000 | 1.3187  | up   |
| FBgn0016131 | Cdk4     | 173   | 310   | 7.4607    | 11.9585   | 0.0003 | 0.8362  | up   |
| FBgn0003996 | w        | 925   | 1344  | 38.9273   | 50.8338   | 0.0046 | 0.5371  | up   |
| FBgn0029755 | Sas10    | 152   | 270   | 6.0070    | 11.1159   | 0.0012 | 0.8231  | up   |
| FBgn0030098 | CG12057  | 0     | 61    | 0.0000    | 6.6146    | 0.0000 | 5.8501  | up   |
| FBgn0035918 | Cdc6     | 169   | 10    | 4.3059    | 0.2730    | 0.0000 | -3.9420 | down |
| FBgn0033229 | CG12822  | 1159  | 733   | 58.2756   | 34.6050   | 0.0001 | -0.6616 | down |
| FBgn0038291 | CG3984   | 118   | 1068  | 6.0139    | 56.3537   | 0.0000 | 3.1651  | up   |
| FBgn0031021 | ND-18    | 1527  | 2195  | 161.6550  | 239.1960  | 0.0038 | 0.5219  | up   |
| FBgn0036449 | bmm      | 1078  | 1581  | 30.4126   | 45.2441   | 0.0020 | 0.5507  | up   |
| FBgn0042712 | HBS1     | 304   | 656   | 8.6170    | 19.5077   | 0.0000 | 1.1056  | up   |
| FBgn0036992 | Hpd      | 7085  | 13401 | 408.5577  | 805.1390  | 0.0000 | 0.9181  | up   |
| FBgn0051313 | CG31313  | 4715  | 3160  | 1062.8244 | 662.0841  | 0.0002 | -0.5785 | down |
| FBgn0044810 | ToiX     | 1074  | 333   | 238.6320  | 71.9409   | 0.0000 | -1.6875 | down |
| FBgn0037298 | Scepdh1  | 6679  | 3837  | 279.4793  | 168.2048  | 0.0000 | -0.8008 | down |
| FBgn0030159 | CG9689   | 1130  | 675   | 137.8292  | 67.4909   | 0.0000 | -0.7438 | down |
| FBgn0039678 | Obp99a   | 46    | 6     | 10.5784   | 1.4264    | 0.0000 | -2.7353 | down |
| FBgn0052170 | CG32170  | 269   | 421   | 8.6574    | 14.1465   | 0.0083 | 0.6428  | up   |
| FBgn0031860 | CG11236  | 284   | 532   | 18.6948   | 35.4569   | 0.0000 | 0.9017  | up   |
| FBgn0010385 | Def      | 31    | 271   | 15.1127   | 135.1410  | 0.0000 | 3.0831  | up   |
| FBgn0034741 | CG4269   | 6     | 42    | 0.7220    | 6.9736    | 0.0001 | 2.6047  | up   |
| FBgn0036278 | CrzR     | 405   | 632   | 9.2189    | 13.9630   | 0.0015 | 0.6393  | up   |
| FBgn0032414 | CG17211  | 1069  | 719   | 13.9050   | 9.2603    | 0.0022 | -0.5728 | down |
| FBgn0030349 | CG10353  | 3178  | 2202  | 42.7812   | 30.8910   | 0.0019 | -0.5304 | down |
| FBgn0025454 | Cyp6g1   | 6774  | 12139 | 237.8640  | 442.1795  | 0.0000 | 0.8401  | up   |
| FBgn0051469 | CG31469  | 34    | 144   | 6.9699    | 28.6231   | 0.0000 | 2.0469  | up   |
| FBgn0003048 | pcx      | 1212  | 781   | 6.2034    | 4.1318    | 0.0001 | -0.6346 | down |
| FBgn0036436 | CG4914   | 55    | 3     | 2.3197    | 0.1302    | 0.0000 | -3.7834 | down |
| FBgn0051089 | CG31089  | 20    | 0     | 1.0707    | 0.0000    | 0.0016 | -4.2929 | down |
| FBgn0030773 | CG9676   | 11335 | 16501 | 874.9630  | 1341.4300 | 0.0013 | 0.5404  | up   |
| FBgn0031313 | CG5080   | 2001  | 3363  | 60.5371   | 109.7544  | 0.0000 | 0.7474  | up   |
| FBgn0023550 | FarO     | 301   | 155   | 8.2955    | 5.1751    | 0.0000 | -0.9540 | down |
| FBgn0035206 | sturkopf | 494   | 872   | 24.5899   | 44.4856   | 0.0000 | 0.8171  | up   |
| FBgn0033729 | Cpr49Af  | 9     | 43    | 2.1323    | 9.9346    | 0.0019 | 2.1279  | up   |
| FBgn0036806 | Cyp12c1  | 712   | 372   | 24.9699   | 13.4524   | 0.0000 | -0.9359 | down |
| FBgn0039896 | yellow-h | 450   | 255   | 21.7200   | 11.3494   | 0.0000 | -0.8181 | down |
| FBgn0035282 | CNMa     | 106   | 20    | 4.2419    | 0.8806    | 0.0000 | -2.3463 | down |
| FBgn0032069 | LManV1   | 2     | 308   | 0.0617    | 6.7758    | 0.0000 | 6.6498  | up   |
| FBgn0036585 | CG13071  | 142   | 55    | 45.4326   | 17.9434   | 0.0000 | -1.3527 | down |

|             |            |      |       |           |          |        |         |      |
|-------------|------------|------|-------|-----------|----------|--------|---------|------|
| FBgn0036875 | CG9449     | 440  | 878   | 19.5052   | 33.1115  | 0.0000 | 0.9936  | up   |
| FBgn0037975 | CG3397     | 445  | 906   | 26.8680   | 57.4793  | 0.0000 | 1.0226  | up   |
| FBgn0003499 | sr         | 276  | 501   | 3.7637    | 5.9224   | 0.0000 | 0.8563  | up   |
| FBgn0041579 | AttC       | 84   | 204   | 6.9325    | 17.3719  | 0.0000 | 1.2680  | up   |
| FBgn0051773 | CG31773    | 29   | 4     | 0.6472    | 0.0883   | 0.0081 | -2.5681 | down |
| FBgn0036597 | CG4962     | 593  | 44    | 68.6784   | 5.3208   | 0.0000 | -3.7216 | down |
| FBgn0039312 | CG10514    | 134  | 238   | 7.7277    | 13.8210  | 0.0030 | 0.8224  | up   |
| FBgn0031327 | CG5397     | 919  | 1400  | 27.5793   | 41.8372  | 0.0003 | 0.6054  | up   |
| FBgn0035262 | CG18171    | 110  | 49    | 2.5880    | 1.1717   | 0.0036 | -1.1507 | down |
| FBgn0026314 | Ugt35B1    | 589  | 3952  | 24.5399   | 163.4580 | 0.0000 | 2.7427  | up   |
| FBgn0039684 | Obp99d     | 2    | 51    | 0.8979    | 15.3532  | 0.0000 | 4.0805  | up   |
| FBgn0026593 | CG5707     | 1469 | 816   | 69.5992   | 40.4077  | 0.0000 | -0.8487 | down |
| FBgn0028984 | Spn88Ea    | 1353 | 1945  | 58.4018   | 86.8530  | 0.0044 | 0.5219  | up   |
| FBgn0030027 | CG1632     | 407  | 671   | 6.1390    | 10.6881  | 0.0001 | 0.7184  | up   |
| FBgn0027611 | LManII     | 8545 | 5728  | 159.2929  | 107.5585 | 0.0002 | -0.5783 | down |
| FBgn0013949 | Elal       | 1084 | 1567  | 71.8223   | 111.9076 | 0.0045 | 0.5299  | up   |
| FBgn0038290 | CG6912     | 74   | 2656  | 3.4504    | 87.3748  | 0.0000 | 5.1440  | up   |
| FBgn0034491 | Hsl        | 1203 | 520   | 22.8576   | 10.3866  | 0.0000 | -1.2097 | down |
| FBgn0031746 | CG9029     | 0    | 28    | 0.0000    | 5.9067   | 0.0000 | 4.7559  | up   |
| FBgn0011279 | Obp69a     | 11   | 73    | 3.2127    | 18.8603  | 0.0000 | 2.6156  | up   |
| FBgn0028919 | CG16865    | 101  | 196   | 7.6696    | 15.4503  | 0.0009 | 0.9478  | up   |
| FBgn0051324 | CG31324    | 373  | 631   | 12.3752   | 19.0856  | 0.0000 | 0.7554  | up   |
| FBgn0261402 | Ir75b      | 180  | 3     | 6.7464    | 0.1146   | 0.0000 | -5.4746 | down |
| FBgn0266064 | GlyS       | 2394 | 3466  | 61.4620   | 92.3479  | 0.0016 | 0.5323  | up   |
| FBgn0263772 | CG43689    | 584  | 373   | 6.1657    | 4.0326   | 0.0016 | -0.6466 | down |
| FBgn0031454 | HemK2      | 336  | 549   | 19.2447   | 33.2017  | 0.0003 | 0.7052  | up   |
| FBgn0038194 | Cyp6d5     | 4980 | 8015  | 207.3020  | 331.0360 | 0.0000 | 0.6851  | up   |
| FBgn0013307 | Odc1       | 1098 | 365   | 62.1176   | 21.3938  | 0.0000 | -1.5874 | down |
| FBgn0013278 | Hsp70Bb    | 74   | 22    | 1.9395    | 0.6197   | 0.0002 | -1.7033 | down |
| FBgn0052104 | CG32104    | 291  | 749   | 4.4110    | 10.2277  | 0.0000 | 1.3594  | up   |
| FBgn0038337 | CG6125     | 651  | 322   | 22.4457   | 11.3473  | 0.0000 | -1.0145 | down |
| FBgn0005683 | pie        | 69   | 21    | 2.2998    | 0.7156   | 0.0006 | -1.6678 | down |
| FBgn0032888 | CheB38c    | 1    | 22    | 0.2872    | 3.2464   | 0.0045 | 3.4738  | up   |
| FBgn0037897 | CG5270     | 1029 | 659   | 8.8846    | 5.8604   | 0.0002 | -0.6434 | down |
| FBgn0038751 | CG4770     | 15   | 57    | 0.7429    | 2.6858   | 0.0008 | 1.8518  | up   |
| FBgn0015040 | Cyp9c1     | 1225 | 568   | 46.1085   | 21.9182  | 0.0000 | -1.1087 | down |
| FBgn0024987 | ssx        | 2036 | 4213  | 37.2023   | 78.3121  | 0.0000 | 1.0474  | up   |
| FBgn0052282 | DrsI4      | 2204 | 453   | 1838.6400 | 368.4670 | 0.0000 | -2.2812 | down |
| FBgn0034756 | Cyp6d2     | 95   | 14    | 3.7714    | 0.5672   | 0.0000 | -2.6732 | down |
| FBgn0036680 | Cpr73D     | 800  | 488   | 22.8382   | 14.0631  | 0.0000 | -0.7132 | down |
| FBgn0033373 | CG8080     | 1272 | 855   | 45.0741   | 30.8704  | 0.0013 | -0.5738 | down |
| FBgn0036428 | Gbs-70E    | 4697 | 3017  | 105.6127  | 67.8813  | 0.0000 | -0.6398 | down |
| FBgn0264326 | PolE1      | 145  | 50    | 1.2712    | 0.4506   | 0.0000 | -1.5173 | down |
| FBgn0039151 | CG13607    | 3386 | 2316  | 122.1801  | 88.0084  | 0.0008 | -0.5491 | down |
| FBgn0031942 | CG7203     | 1051 | 612   | 159.0654  | 98.2274  | 0.0000 | -0.7804 | down |
| FBgn0033597 | Cpr47Ea    | 39   | 2     | 3.6338    | 0.1931   | 0.0000 | -3.7048 | down |
| FBgn0038653 | Octalpha2R | 719  | 1113  | 5.5577    | 10.3857  | 0.0002 | 0.6283  | up   |
| FBgn0039748 | CG15529    | 186  | 314   | 13.2128   | 25.3030  | 0.0026 | 0.7507  | up   |
| FBgn0033544 | CG7220     | 5339 | 8433  | 231.8693  | 326.1789 | 0.0000 | 0.6580  | up   |
| FBgn0026417 | Hus1-like  | 4422 | 3070  | 28.9451   | 20.2723  | 0.0018 | -0.5276 | down |
| FBgn0037936 | CG6908     | 980  | 2279  | 51.9151   | 118.9370 | 0.0000 | 1.2153  | up   |
| FBgn0264707 | RhoGEF3    | 3552 | 2346  | 33.6376   | 26.2484  | 0.0001 | -0.5995 | down |
| FBgn0002773 | Mic2       | 9280 | 14242 | 279.3711  | 406.1691 | 0.0000 | 0.6166  | up   |
| FBgn0025692 | Lfg        | 125  | 52    | 11.5801   | 4.9437   | 0.0002 | -1.2495 | down |
| FBgn0001229 | Hsp67Bc    | 234  | 127   | 18.4337   | 10.1984  | 0.0010 | -0.8775 | down |
| FBgn0039257 | tnc        | 717  | 460   | 4.0333    | 2.6875   | 0.0008 | -0.6405 | down |
| FBgn0039315 | CG13658    | 442  | 87    | 21.6381   | 2.7690   | 0.0000 | -2.3321 | down |
| FBgn0036260 | Rh7        | 446  | 675   | 9.2922    | 12.2774  | 0.0045 | 0.5953  | up   |
| FBgn0038236 | Cyp313a1   | 5825 | 8862  | 251.4380  | 362.7080 | 0.0000 | 0.6039  | up   |
| FBgn0032701 | CG10341    | 155  | 298   | 5.5036    | 10.8931  | 0.0000 | 0.9369  | up   |
| FBgn0034247 | CG6484     | 39   | 95    | 1.9483    | 4.9361   | 0.0030 | 1.2601  | up   |
| FBgn0033936 | Achl       | 1172 | 2816  | 16.3519   | 39.3484  | 0.0000 | 1.2626  | up   |
| FBgn0033051 | Strica     | 94   | 31    | 2.4270    | 0.7240   | 0.0001 | -1.5689 | down |
| FBgn0033395 | Cyp4p2     | 89   | 29    | 3.6760    | 1.2048   | 0.0001 | -1.5839 | down |
| FBgn0027259 | Kmn1       | 163  | 28    | 10.2514   | 1.4139   | 0.0000 | -2.4978 | down |
| FBgn0010401 | Os-C       | 68   | 135   | 16.5263   | 33.1941  | 0.0097 | 0.9768  | up   |
| FBgn0029608 | CG3091     | 1428 | 865   | 88.7437   | 55.5703  | 0.0000 | -0.7239 | down |
| FBgn0040629 | CAH5       | 75   | 335   | 5.5916    | 24.9664  | 0.0000 | 2.1419  | up   |
| FBgn0035076 | Ance-5     | 2865 | 1763  | 89.0852   | 55.9942  | 0.0000 | -0.7015 | down |
| FBgn0027844 | CAH1       | 1540 | 986   | 70.6636   | 47.4740  | 0.0000 | -0.6440 | down |
| FBgn0038525 | CG14329    | 249  | 5     | 18.7036   | 0.4044   | 0.0000 | -5.3644 | down |
| FBgn0039154 | Npc2f      | 33   | 3     | 4.3350    | 0.3872   | 0.0002 | -3.0648 | down |
| FBgn0033149 | CG11060    | 27   | 72    | 0.8298    | 2.0116   | 0.0082 | 1.3788  | up   |
| FBgn0265356 | tn         | 2019 | 2895  | 27.0233   | 40.0105  | 0.0034 | 0.5183  | up   |
| FBgn0005664 | Crys       | 425  | 82    | 12.3450   | 2.4943   | 0.0000 | -2.3599 | down |
| FBgn0051344 | CG31344    | 420  | 833   | 23.5374   | 47.1860  | 0.0000 | 0.9848  | up   |
| FBgn0050285 | CG30285    | 230  | 66    | 46.7816   | 13.6201  | 0.0000 | -1.7858 | down |
| FBgn0041181 | Tep3       | 958  | 636   | 11.9896   | 7.9824   | 0.0015 | -0.5915 | down |
| FBgn0011591 | fng        | 609  | 990   | 22.2121   | 36.8210  | 0.0000 | 0.6987  | up   |
| FBgn0033807 | AQP        | 246  | 525   | 14.6475   | 33.3423  | 0.0000 | 1.0890  | up   |
| FBgn0038172 | Adgf-D     | 811  | 1525  | 36.6629   | 70.6836  | 0.0000 | 0.9088  | up   |
| FBgn0037999 | CG4860     | 57   | 166   | 3.2085    | 9.9534   | 0.0000 | 1.5232  | up   |
| FBgn0262029 | d          | 161  | 42    | 1.8850    | 0.5175   | 0.0000 | -1.9130 | down |
| FBgn0039807 | CG15546    | 204  | 330   | 7.4863    | 12.0369  | 0.0086 | 0.6897  | up   |
| FBgn0051205 | CG31205    | 724  | 3729  | 61.2458   | 293.4567 | 0.0000 | 2.3617  | up   |
| FBgn0036910 | Cyp305a1   | 1581 | 2788  | 68.2123   | 128.1580 | 0.0000 | 0.8166  | up   |
| FBgn0036224 | Rpt4R      | 65   | 138   | 2.9048    | 6.2996   | 0.0018 | 1.0724  | up   |
| FBgn0031865 | Nha1       | 228  | 514   | 5.9669    | 14.3049  | 0.0000 | 1.1676  | up   |
| FBgn0033443 | CG1698     | 140  | 54    | 4.5389    | 1.7177   | 0.0000 | -1.3583 | down |
| FBgn0267348 | LanB2      | 446  | 708   | 4.7285    | 7.8879   | 0.0004 | 0.6641  | up   |
| FBgn0020908 | Scp1       | 258  | 754   | 22.0500   | 58.4279  | 0.0000 | 1.5419  | up   |
| FBgn0039703 | CG7829     | 1638 | 3229  | 138.1660  | 280.8130 | 0.0000 | 0.9773  | up   |

|             |            |       |       |           |           |        |         |      |
|-------------|------------|-------|-------|-----------|-----------|--------|---------|------|
| FBgn0033268 | Obp44a     | 18238 | 10444 | 2493.5837 | 1462.0496 | 0.0000 | -0.8056 | down |
| FBgn0035164 | CG13901    | 138   | 239   | 11.2810   | 20.0825   | 0.0063 | 0.7863  | up   |
| FBgn0016122 | Acer       | 4611  | 2866  | 127.1850  | 77.4620   | 0.0000 | -0.6872 | down |
| FBgn0034512 | Bbd        | 6601  | 9682  | 741.9890  | 1115.5062 | 0.0006 | 0.5512  | up   |
| FBgn0030482 | CG1673     | 498   | 903   | 13.9715   | 24.6334   | 0.0000 | 0.8558  | up   |
| FBgn0036698 | CG7724     | 828   | 1201  | 41.6517   | 62.6098   | 0.0063 | 0.5346  | up   |
| FBgn0038407 | CG6126     | 4446  | 2844  | 167.7122  | 113.8938  | 0.0000 | -0.6457 | down |
| FBgn0262035 | CG42846    | 580   | 375   | 110.5760  | 71.7500   | 0.0029 | -0.6290 | down |
| FBgn0029851 | CG14445    | 58    | 127   | 2.5891    | 5.4483    | 0.0018 | 1.1150  | up   |
| FBgn0004865 | Eip78C     | 977   | 640   | 18.3395   | 11.7301   | 0.0007 | -0.6108 | down |
| FBgn0035777 | CG8563     | 9     | 49    | 0.3859    | 1.6885    | 0.0001 | 2.3120  | up   |
| FBgn0024989 | CG3777     | 37    | 92    | 0.5782    | 1.6856    | 0.0027 | 1.2882  | up   |
| FBgn0017558 | Pdk        | 3250  | 5160  | 68.6716   | 103.1768  | 0.0000 | 0.6654  | up   |
| FBgn0001112 | Gld        | 520   | 948   | 11.9511   | 21.7741   | 0.0000 | 0.8637  | up   |
| FBgn0011768 | Fdh        | 2695  | 1701  | 137.6740  | 92.4988   | 0.0000 | -0.6649 | down |
| FBgn0038654 | CG14298    | 249   | 395   | 28.6496   | 41.1512   | 0.0069 | 0.6621  | up   |
| FBgn0038680 | Cyp12a5    | 402   | 141   | 16.0285   | 5.6310    | 0.0000 | -1.5057 | down |
| FBgn0038180 | Chf5       | 93    | 242   | 2.9657    | 7.9917    | 0.0000 | 1.3682  | up   |
| FBgn0029858 | mldr       | 149   | 75    | 6.2006    | 3.1608    | 0.0043 | -0.9815 | down |
| FBgn0052191 | CG32191    | 404   | 656   | 12.7301   | 21.1596   | 0.0002 | 0.6965  | up   |
| FBgn0033289 | CG2121     | 258   | 652   | 9.4453    | 25.2241   | 0.0000 | 1.3325  | up   |
| FBgn0063492 | GstE8      | 251   | 124   | 18.9617   | 8.9297    | 0.0000 | -1.0124 | down |
| FBgn0038632 | CG14301    | 83    | 32    | 2.9549    | 1.0949    | 0.0033 | -1.3472 | down |
| FBgn0037140 | SLC22A     | 385   | 244   | 12.9821   | 8.9016    | 0.0088 | -0.6570 | down |
| FBgn0001325 | Kr         | 48    | 105   | 0.8138    | 1.6437    | 0.0093 | 1.1107  | up   |
| FBgn0035544 | CG15021    | 1727  | 1113  | 95.8452   | 68.1386   | 0.0000 | -0.6347 | down |
| FBgn0015032 | Cyp4c3     | 107   | 196   | 3.7513    | 7.0312    | 0.0048 | 0.8654  | up   |
| FBgn0034335 | GstE1      | 1253  | 757   | 143.3580  | 88.6455   | 0.0000 | -0.7276 | down |
| FBgn0035806 | PGRP-SD    | 500   | 763   | 60.2226   | 93.1341   | 0.0019 | 0.6073  | up   |
| FBgn0032615 | CG6012     | 53    | 15    | 4.2485    | 1.2267    | 0.0040 | -1.7514 | down |
| FBgn0010051 | ltp        | 3017  | 1981  | 23.8465   | 17.9552   | 0.0001 | -0.6080 | down |
| FBgn0052296 | Mtrf       | 1019  | 699   | 8.3688    | 5.4219    | 0.0066 | -0.5444 | down |
| FBgn0023549 | Mct1       | 604   | 376   | 14.1647   | 9.8931    | 0.0004 | -0.6836 | down |
| FBgn0027932 | Akap200    | 4533  | 3006  | 94.8651   | 65.1654   | 0.0001 | -0.5938 | down |
| FBgn0038312 | Zip88E     | 179   | 90    | 7.9086    | 4.0703    | 0.0009 | -0.9848 | down |
| FBgn0039759 | CG9733     | 47    | 163   | 2.1496    | 7.8584    | 0.0000 | 1.7697  | up   |
| FBgn0010383 | Cyp18a1    | 305   | 653   | 6.8197    | 16.5572   | 0.0000 | 1.0942  | up   |
| FBgn0038463 | CG3534     | 856   | 1456  | 28.7056   | 49.2404   | 0.0000 | 0.7642  | up   |
| FBgn0029170 | TwdlT      | 347   | 88    | 14.9097   | 4.0133    | 0.0000 | -1.9676 | down |
| FBgn0086347 | Myo31DF    | 659   | 1006  | 11.0369   | 16.9691   | 0.0007 | 0.6081  | up   |
| FBgn0264953 | Piezo      | 2251  | 1386  | 16.1645   | 9.8229    | 0.0000 | -0.7006 | down |
| FBgn0260995 | dpr21      | 879   | 488   | 53.2301   | 24.9308   | 0.0000 | -0.8489 | down |
| FBgn0003356 | Jon99Cii   | 1     | 34    | 0.1958    | 3.6915    | 0.0000 | 4.0779  | up   |
| FBgn0034920 | CG5597     | 802   | 1470  | 84.5241   | 163.0990  | 0.0000 | 0.8719  | up   |
| FBgn0050197 | CG30197    | 3895  | 2710  | 1076.6800 | 754.8580  | 0.0022 | -0.5245 | down |
| FBgn0036380 | CG8757     | 177   | 359   | 5.9738    | 11.5366   | 0.0000 | 1.0145  | up   |
| FBgn0030518 | CG11134    | 421   | 270   | 38.3531   | 25.4560   | 0.0089 | -0.6401 | down |
| FBgn0037519 | CG3014     | 4962  | 3440  | 81.9137   | 54.4847   | 0.0016 | -0.5297 | down |
| FBgn0261792 | snRNP-U1-C | 67    | 165   | 9.0832    | 22.3527   | 0.0000 | 1.2853  | up   |
| FBgn0050098 | CG30098    | 60    | 3     | 6.8346    | 0.3335    | 0.0000 | -3.9066 | down |
| FBgn0000473 | Cyp6a2     | 709   | 1383  | 27.9007   | 57.1115   | 0.0000 | 0.9615  | up   |
| FBgn0031800 | CG9497     | 1945  | 1169  | 93.5820   | 58.1436   | 0.0000 | -0.7353 | down |
| FBgn0039742 | CG15528    | 223   | 359   | 17.2992   | 29.1477   | 0.0065 | 0.6830  | up   |
| FBgn0035855 | CG7366     | 136   | 63    | 2.3293    | 1.5380    | 0.0013 | -1.0985 | down |
| FBgn0266666 | Sem1       | 377   | 233   | 140.7220  | 81.4631   | 0.0039 | -0.6930 | down |
| FBgn0033603 | Cpr47Ef    | 152   | 70    | 5.3371    | 2.8000    | 0.0004 | -1.1081 | down |
| FBgn0039241 | CG11089    | 2593  | 3993  | 83.6162   | 135.9704  | 0.0000 | 0.6213  | up   |
| FBgn0002673 | twe        | 71    | 23    | 2.0948    | 0.6608    | 0.0011 | -1.5832 | down |
| FBgn0039777 | Jon99Fii   | 2     | 52    | 0.2717    | 5.1139    | 0.0000 | 4.1080  | up   |
| FBgn0021795 | Tapdelta   | 1047  | 1720  | 126.1530  | 216.5060  | 0.0000 | 0.7142  | up   |
| FBgn0038589 | CG18598    | 243   | 385   | 149.8120  | 235.5360  | 0.0081 | 0.6602  | up   |
| FBgn0028533 | CG7953     | 0     | 55    | 0.0707    | 4.1050    | 0.0000 | 5.7034  | up   |
| FBgn0036623 | Agpat3     | 2433  | 1451  | 115.2249  | 66.2610   | 0.0000 | -0.7466 | down |
| FBgn0039820 | CG15554    | 12    | 60    | 1.3355    | 6.4492    | 0.0000 | 2.2224  | up   |
| FBgn0040060 | yip7       | 0     | 25    | 0.0000    | 2.6627    | 0.0001 | 4.5988  | up   |
| FBgn0028496 | CG30116    | 3693  | 2504  | 41.1198   | 33.7087   | 0.0004 | -0.5617 | down |
| FBgn0035943 | CG5653     | 313   | 100   | 17.0624   | 5.6824    | 0.0000 | -1.6370 | down |
| FBgn0035791 | CG8539     | 289   | 58    | 15.9568   | 3.1683    | 0.0000 | -2.2971 | down |
| FBgn0050101 | Vajk4      | 68    | 159   | 3.4045    | 8.2948    | 0.0000 | 1.2112  | up   |
| FBgn0002577 | m          | 5     | 32    | 0.1136    | 0.6268    | 0.0058 | 2.4435  | up   |
| FBgn0050295 | Ipk1       | 865   | 1483  | 20.4332   | 35.8906   | 0.0000 | 0.7757  | up   |
| FBgn0261575 | tobi       | 1541  | 2294  | 53.7187   | 83.3145   | 0.0004 | 0.5723  | up   |
| FBgn0053143 | CG33143    | 3019  | 1436  | 38.8040   | 15.2777   | 0.0000 | -1.0728 | down |
| FBgn0037534 | ELOVL      | 1482  | 2306  | 53.2454   | 80.5675   | 0.0000 | 0.6361  | up   |
| FBgn0003719 | tld        | 45    | 144   | 0.8787    | 2.8628    | 0.0000 | 1.6534  | up   |
| FBgn0028841 | jhamt      | 6     | 41    | 0.5097    | 3.1988    | 0.0002 | 2.5708  | up   |
| FBgn0051343 | CG31343    | 4     | 86    | 0.1122    | 2.0179    | 0.0000 | 4.0994  | up   |
| FBgn0038214 | CG9616     | 46    | 117   | 7.1973    | 4.7736    | 0.0001 | 1.3253  | up   |
| FBgn0021738 | Crg-1      | 197   | 383   | 10.6979   | 18.1603   | 0.0000 | 0.9540  | up   |
| FBgn0037126 | CG14567    | 204   | 340   | 27.3002   | 46.5775   | 0.0025 | 0.7326  | up   |
| FBgn0038467 | AdSL       | 750   | 1181  | 20.6977   | 33.1968   | 0.0001 | 0.6530  | up   |
| FBgn0031249 | CG11911    | 3     | 29    | 0.3085    | 2.4357    | 0.0021 | 2.8823  | up   |
| FBgn0038983 | CG5326     | 689   | 1118  | 32.1475   | 53.8108   | 0.0000 | 0.6961  | up   |
| FBgn0039049 | CG6726     | 119   | 212   | 5.4807    | 10.0588   | 0.0061 | 0.8261  | up   |
| FBgn0020270 | mre11      | 768   | 446   | 27.2772   | 16.1619   | 0.0000 | -0.7839 | down |
| FBgn0036004 | Jarid2     | 2078  | 1434  | 14.5474   | 10.1186   | 0.0023 | -0.5362 | down |
| FBgn0262366 | CG43064    | 101   | 37    | 3.2020    | 1.0828    | 0.0002 | -1.4240 | down |
| FBgn0024836 | stan       | 934   | 577   | 4.5739    | 2.9574    | 0.0000 | -0.6952 | down |
| FBgn0031971 | Sirup      | 1245  | 786   | 169.0980  | 103.4570  | 0.0000 | -0.6642 | down |
| FBgn0037683 | CG18473    | 17    | 292   | 1.0164    | 17.1661   | 0.0000 | 4.0179  | up   |
| FBgn0032068 | LManV      | 0     | 156   | 0.0000    | 3.1675    | 0.0000 | 7.1894  | up   |
| FBgn0005660 | Ets21C     | 18    | 88    | 0.3029    | 2.5877    | 0.0000 | 2.2220  | up   |

|             |           |       |       |           |           |        |         |      |
|-------------|-----------|-------|-------|-----------|-----------|--------|---------|------|
| FBgn0052251 | Claspin   | 239   | 29    | 2.7315    | 0.3367    | 0.0000 | -2.9981 | down |
| FBgn0052823 | Sdic3     | 114   | 0     | 3.3475    | 0.0000    | 0.0000 | -6.7419 | down |
| FBgn0033215 | Dgat2     | 50    | 168   | 3.3216    | 11.4124   | 0.0000 | 1.7256  | up   |
| FBgn0029657 | CG12535   | 118   | 263   | 1.2269    | 2.2652    | 0.0000 | 1.1477  | up   |
| FBgn0259834 | out       | 308   | 592   | 7.2952    | 14.4064   | 0.0000 | 0.9389  | up   |
| FBgn0034295 | CG10911   | 1     | 54    | 0.1415    | 4.0684    | 0.0000 | 4.7288  | up   |
| FBgn0052475 | mtlh8     | 807   | 1411  | 15.7023   | 29.4253   | 0.0000 | 0.8039  | up   |
| FBgn0038098 | CG7381    | 380   | 200   | 8.0197    | 4.4115    | 0.0000 | -0.9237 | down |
| FBgn0001083 | fw        | 318   | 526   | 4.6564    | 7.9385    | 0.0003 | 0.7228  | up   |
| FBgn0038816 | Lrrk      | 1257  | 877   | 10.3186   | 7.2876    | 0.0095 | -0.5201 | down |
| FBgn0031775 | CG9150    | 183   | 306   | 17.7164   | 30.8729   | 0.0043 | 0.7370  | up   |
| FBgn0051207 | CG31207   | 645   | 1086  | 62.7862   | 103.5566  | 0.0000 | 0.7493  | up   |
| FBgn0035239 | CG18170   | 133   | 39    | 1.6103    | 0.6620    | 0.0000 | -1.7436 | down |
| FBgn0022355 | Tsfl      | 91529 | 58874 | 2922.0622 | 2018.2425 | 0.0000 | -0.6379 | down |
| FBgn0035189 | CG9119    | 892   | 1334  | 52.7675   | 83.9815   | 0.0010 | 0.5787  | up   |
| FBgn0262003 | CG42821   | 207   | 100   | 54.2216   | 13.7726   | 0.0001 | -1.0430 | down |
| FBgn0038074 | Gnmt      | 656   | 4138  | 52.3340   | 336.3220  | 0.0000 | 2.6538  | up   |
| FBgn0044812 | TotC      | 3399  | 1479  | 702.3930  | 304.0840  | 0.0000 | -1.2012 | down |
| FBgn0011281 | Obp83a    | 119   | 341   | 12.8107   | 38.4750   | 0.0000 | 1.5090  | up   |
| FBgn0036935 | CG14186   | 2453  | 3652  | 44.4451   | 67.7727   | 0.0003 | 0.5726  | up   |
| FBgn0035873 | CG13670   | 410   | 218   | 35.8016   | 20.0083   | 0.0000 | -0.9093 | down |
| FBgn0053971 | lr62a     | 162   | 76    | 6.8447    | 3.2459    | 0.0003 | -1.0825 | down |
| FBgn0038301 | CG6654    | 616   | 2052  | 17.9631   | 61.6944   | 0.0000 | 1.7329  | up   |
| FBgn0000109 | Aprt      | 134   | 236   | 12.2732   | 22.0815   | 0.0041 | 0.8102  | up   |
| FBgn0260429 | CG42524   | 22    | 81    | 0.5840    | 1.9728    | 0.0000 | 1.8293  | up   |
| FBgn0041087 | wun2      | 233   | 131   | 9.0969    | 5.1566    | 0.0031 | -0.8269 | down |
| FBgn0035607 | CG4835    | 51    | 0     | 0.9114    | 0.0000    | 0.0000 | -5.5980 | down |
| FBgn0037547 | CG7910    | 7     | 77    | 0.2942    | 2.8987    | 0.0000 | 3.2720  | up   |
| FBgn0004244 | Rdl       | 5779  | 8262  | 37.9170   | 48.1176   | 0.0033 | 0.5142  | up   |
| FBgn0058191 | CG40191   | 896   | 1391  | 43.6331   | 60.2464   | 0.0001 | 0.6326  | up   |
| FBgn0052523 | CG32523   | 676   | 1263  | 61.1685   | 118.1530  | 0.0000 | 0.8994  | up   |
| FBgn0040502 | CG8343    | 17524 | 45221 | 2421.9900 | 6484.0600 | 0.0000 | 1.3663  | up   |
| FBgn0262717 | Skeletor  | 364   | 806   | 9.0291    | 14.5237   | 0.0000 | 1.1432  | up   |
| FBgn0039024 | Nep15     | 2364  | 1610  | 70.4406   | 49.0757   | 0.0009 | -0.5552 | down |
| FBgn0023535 | arg       | 12    | 57    | 0.8460    | 3.9488    | 0.0001 | 2.1498  | up   |
| FBgn0042131 | CG18808   | 5549  | 3771  | 23.2258   | 16.1377   | 0.0004 | -0.5585 | down |
| FBgn0051233 | CG31233   | 0     | 43    | 0.0000    | 0.9796    | 0.0000 | 5.3560  | up   |
| FBgn0051973 | Cda5      | 1179  | 629   | 13.2729   | 7.7352    | 0.0000 | -0.9066 | down |
| FBgn0033593 | Listerici | 1324  | 1887  | 394.4940  | 579.2110  | 0.0073 | 0.5095  | up   |
| FBgn0039487 | gb        | 279   | 562   | 7.9834    | 17.1759   | 0.0000 | 1.0062  | up   |
| FBgn0039214 | puf       | 1694  | 1147  | 7.6326    | 5.2934    | 0.0011 | -0.5635 | down |
| FBgn0038038 | Sccpdh2   | 1369  | 1965  | 65.5575   | 98.4636   | 0.0047 | 0.5197  | up   |
| FBgn0036790 | AstC-R1   | 169   | 515   | 4.6408    | 13.0752   | 0.0000 | 1.6001  | up   |
| FBgn0036139 | CG6216    | 24    | 0     | 1.5453    | 0.0000    | 0.0001 | -4.5436 | down |
| FBgn0052212 | CG32212   | 40    | 7     | 5.8863    | 1.0524    | 0.0010 | -2.3479 | down |
| FBgn0002565 | Lsp2      | 9192  | 18587 | 289.3705  | 618.0670  | 0.0000 | 1.0144  | up   |
| FBgn0033542 | CAH13     | 105   | 37    | 4.0727    | 1.4637    | 0.0000 | -1.4795 | down |
| FBgn0004197 | Ser       | 12    | 54    | 0.1443    | 0.6294    | 0.0002 | 2.0733  | up   |
| FBgn0032821 | CdGAPr    | 1908  | 1183  | 16.5154   | 10.0558   | 0.0000 | -0.6905 | down |
| FBgn0038676 | CG6026    | 32    | 2     | 0.3684    | 0.0242    | 0.0001 | -3.4279 | down |
| FBgn0031653 | Jon25Biii | 0     | 60    | 0.0000    | 6.8430    | 0.0000 | 5.8266  | up   |
| FBgn0036549 | CG10516   | 1428  | 556   | 78.1849   | 31.2305   | 0.0000 | -1.3605 | down |
| FBgn0034647 | pirk      | 79    | 211   | 4.1349    | 11.0073   | 0.0000 | 1.4038  | up   |
| FBgn0052368 | CG32368   | 59    | 18    | 29.6660   | 8.8561    | 0.0033 | -1.6563 | down |
| FBgn0035915 | S-Lap1    | 114   | 44    | 3.6850    | 1.4704    | 0.0001 | -1.3535 | down |
| FBgn0051380 | CG31380   | 1     | 36    | 0.1151    | 2.0741    | 0.0000 | 4.1579  | up   |
| FBgn0020277 | lush      | 67    | 145   | 5.8118    | 12.5659   | 0.0007 | 1.1002  | up   |
| FBgn0038201 | PK1-R     | 86    | 227   | 2.8139    | 8.1839    | 0.0000 | 1.3878  | up   |
| FBgn0036106 | CG6409    | 10563 | 14973 | 689.6004  | 1051.6252 | 0.0076 | 0.5020  | up   |
| FBgn0051216 | Naam      | 149   | 264   | 5.6015    | 10.1384   | 0.0016 | 0.8194  | up   |
| FBgn0037344 | CG2926    | 2772  | 1951  | 18.7875   | 13.3048   | 0.0053 | -0.5078 | down |
| FBgn0014455 | Ahcy      | 1518  | 2239  | 65.2819   | 100.7956  | 0.0008 | 0.5590  | up   |
| FBgn0032741 | Sidpn     | 866   | 1296  | 23.9456   | 37.0975   | 0.0010 | 0.5797  | up   |
| FBgn0037265 | spartin   | 873   | 436   | 28.2619   | 14.3977   | 0.0000 | -1.0012 | down |
| FBgn0037167 | CG11425   | 163   | 52    | 14.2930   | 4.8259    | 0.0000 | -1.6296 | down |
| FBgn0031490 | CG17264   | 199   | 28    | 4.9084    | 0.7415    | 0.0000 | -2.7840 | down |
| FBgn0025595 | AkhR      | 1552  | 635   | 56.9245   | 23.6360   | 0.0000 | -1.2892 | down |
| FBgn0034515 | CG13428   | 440   | 947   | 129.6303  | 278.8758  | 0.0000 | 1.1026  | up   |
| FBgn0028542 | NimB4     | 270   | 440   | 14.2912   | 24.2335   | 0.0014 | 0.7010  | up   |
| FBgn0016685 | Nlp       | 1083  | 673   | 95.9684   | 59.7882   | 0.0000 | -0.6868 | down |
| FBgn0037222 | CG14642   | 9     | 78    | 0.5082    | 4.1024    | 0.0000 | 2.9711  | up   |
| FBgn0032381 | Mal-B1    | 164   | 81    | 6.6652    | 3.3305    | 0.0012 | -1.0094 | down |
| FBgn0028396 | TotA      | 6737  | 4045  | 1379.7700 | 806.8670  | 0.0000 | -0.7372 | down |
| FBgn0039629 | CG11842   | 532   | 237   | 37.9756   | 17.3585   | 0.0000 | -1.1643 | down |
| FBgn0036262 | CG6910    | 9974  | 18494 | 483.5548  | 872.0271  | 0.0000 | 0.8894  | up   |
| FBgn0032494 | CG5945    | 5873  | 9409  | 428.5591  | 705.8371  | 0.0000 | 0.6785  | up   |
| FBgn0051075 | CG31075   | 1717  | 1104  | 67.9112   | 46.2427   | 0.0000 | -0.6380 | down |
| FBgn0031791 | AANATL2   | 105   | 39    | 11.5173   | 4.1727    | 0.0001 | -1.4056 | down |
| FBgn0001124 | Got1      | 4857  | 7378  | 201.3794  | 315.1316  | 0.0000 | 0.6017  | up   |
| FBgn0004654 | Pgd       | 3053  | 4504  | 123.4122  | 194.8188  | 0.0004 | 0.5595  | up   |
| FBgn0029831 | CG5966    | 1101  | 1957  | 28.4548   | 51.5419   | 0.0000 | 0.8279  | up   |
| FBgn0026403 | Ndg       | 435   | 169   | 5.8832    | 2.3886    | 0.0000 | -1.3597 | down |
| FBgn0038387 | blp       | 210   | 410   | 18.0705   | 35.2945   | 0.0000 | 0.9603  | up   |
| FBgn0037788 | CAH7      | 1315  | 763   | 61.4051   | 37.8309   | 0.0000 | -0.7858 | down |
| FBgn0000078 | Amy-d     | 762   | 467   | 31.2957   | 20.6601   | 0.0001 | -0.7064 | down |
| FBgn0041249 | Gr22f     | 0     | 18    | 0.0734    | 1.3374    | 0.0062 | 4.1478  | up   |
| FBgn0028394 | CG17834   | 217   | 352   | 9.0385    | 15.5423   | 0.0055 | 0.6938  | up   |
| FBgn0014863 | Mlp84B    | 3495  | 5988  | 95.1945   | 163.3246  | 0.0000 | 0.7753  | up   |
| FBgn0051407 | CG31407   | 4810  | 8782  | 28.2399   | 53.6870   | 0.0000 | 0.8670  | up   |
| FBgn0015075 | Ddx1      | 452   | 292   | 11.7992   | 7.8983    | 0.0085 | -0.6298 | down |
| FBgn0039239 | CG13641   | 1     | 27    | 0.4927    | 7.1434    | 0.0002 | 3.7567  | up   |
| FBgn0002736 | mago      | 147   | 288   | 10.7453   | 20.2037   | 0.0000 | 0.9638  | up   |

|             |           |       |       |           |           |        |         |      |
|-------------|-----------|-------|-------|-----------|-----------|--------|---------|------|
| FBgn0026602 | Adk3      | 733   | 1777  | 20.5542   | 43.1709   | 0.0000 | 1.2750  | up   |
| FBgn0032835 | CG16772   | 3475  | 2344  | 271.0610  | 194.0058  | 0.0003 | -0.5692 | down |
| FBgn0259716 | Nepl6     | 609   | 401   | 20.3909   | 13.6371   | 0.0053 | -0.6029 | down |
| FBgn0035227 | lml1      | 4769  | 1762  | 61.9610   | 23.1910   | 0.0000 | -1.4373 | down |
| FBgn0027657 | glob1     | 4689  | 2955  | 430.4122  | 269.3227  | 0.0000 | -0.6673 | down |
| FBgn0058263 | MF517     | 998   | 666   | 45.5711   | 28.5540   | 0.0018 | -0.5841 | down |
| FBgn0040207 | kat80     | 1002  | 560   | 18.9028   | 10.6938   | 0.0000 | -0.8395 | down |
| FBgn0033464 | CG1441    | 1018  | 2221  | 39.8784   | 90.6059   | 0.0000 | 1.1233  | up   |
| FBgn0037046 | CG10581   | 61    | 134   | 10.2948   | 22.4560   | 0.0010 | 1.1203  | up   |
| FBgn0032698 | CG10336   | 8     | 75    | 0.5341    | 4.6303    | 0.0000 | 3.0661  | up   |
| FBgn0040491 | Buffy     | 273   | 451   | 22.2326   | 37.7991   | 0.0007 | 0.7207  | up   |
| FBgn0035434 | Drs15     | 2375  | 990   | 1278.8900 | 522.7750  | 0.0000 | -1.2629 | down |
| FBgn0001168 | h         | 883   | 1401  | 26.0051   | 40.6017   | 0.0000 | 0.6640  | up   |
| FBgn0037773 | CG5359    | 48    | 108   | 2.7275    | 6.6088    | 0.0043 | 1.1509  | up   |
| FBgn0037410 | Osi2      | 221   | 1374  | 10.5406   | 70.1504   | 0.0000 | 2.6290  | up   |
| FBgn0030993 | Mec2      | 196   | 418   | 11.4061   | 26.6136   | 0.0000 | 1.0871  | up   |
| FBgn0001137 | grk       | 402   | 674   | 16.5433   | 27.6453   | 0.0000 | 0.7427  | up   |
| FBgn0038020 | GstD9     | 754   | 477   | 86.6483   | 55.5647   | 0.0003 | -0.6607 | down |
| FBgn0014019 | Rh5       | 10577 | 6630  | 669.3242  | 433.9447  | 0.0000 | -0.6751 | down |
| FBgn0001256 | ImpL1     | 61    | 12    | 3.9083    | 0.8152    | 0.0000 | -2.2484 | down |
| FBgn0000045 | Act79B    | 1294  | 2309  | 64.7631   | 122.8125  | 0.0000 | 0.8336  | up   |
| FBgn0067312 | CheB38a   | 1     | 23    | 0.4185    | 5.0348    | 0.0024 | 3.5350  | up   |
| FBgn0033153 | Gadd45    | 146   | 350   | 6.8410    | 16.7921   | 0.0000 | 1.2539  | up   |
| FBgn0083973 | dunk      | 0     | 29    | 0.0836    | 2.5863    | 0.0000 | 4.8047  | up   |
| FBgn0010423 | TpnC47D   | 0     | 21    | 0.0000    | 2.8881    | 0.0008 | 4.3585  | up   |
| FBgn0029521 | Orla      | 9     | 44    | 0.7002    | 3.0535    | 0.0012 | 2.1602  | up   |
| FBgn0032891 | Oseg5     | 51    | 15    | 1.2367    | 0.3756    | 0.0088 | -1.6970 | down |
| FBgn0086704 | stops     | 4254  | 2668  | 126.9119  | 83.9774   | 0.0000 | -0.6742 | down |
| FBgn0085195 | CG34166   | 932   | 2232  | 377.4976  | 841.4743  | 0.0000 | 1.2576  | up   |
| FBgn0034330 | BomS4     | 70    | 0     | 152.7930  | 0.0000    | 0.0000 | -6.0467 | down |
| FBgn0016797 | fz2       | 2834  | 1875  | 33.9935   | 21.7546   | 0.0001 | -0.5970 | down |
| FBgn0024811 | Crk       | 1935  | 1313  | 78.4979   | 52.0509   | 0.0009 | -0.5604 | down |
| FBgn0004181 | Ebp       | 4     | 45    | 0.3475    | 2.4315    | 0.0000 | 3.1812  | up   |
| FBgn0053494 | CG33494   | 815   | 356   | 91.4545   | 37.0090   | 0.0000 | -1.1938 | down |
| FBgn0034276 | Sardh     | 199   | 401   | 4.6674    | 9.8152    | 0.0000 | 1.0056  | up   |
| FBgn0031489 | CG17224   | 968   | 505   | 55.6752   | 30.9236   | 0.0000 | -0.9386 | down |
| FBgn0039800 | Npc2g     | 8520  | 3450  | 1097.5120 | 385.5162  | 0.0000 | -1.3053 | down |
| FBgn0029588 | CR14798   | 22    | 69    | 2.0083    | 6.4400    | 0.0012 | 1.6012  | up   |
| FBgn0015037 | Cyp4p1    | 1109  | 2862  | 42.0412   | 106.3470  | 0.0000 | 1.3656  | up   |
| FBgn0039518 | CG13978   | 2     | 39    | 0.0706    | 0.8848    | 0.0000 | 3.7027  | up   |
| FBgn0034117 | CG7997    | 3208  | 2212  | 142.1044  | 101.2441  | 0.0014 | -0.5374 | down |
| FBgn0053926 | CG33926   | 641   | 2953  | 69.2200   | 338.2795  | 0.0000 | 2.2006  | up   |
| FBgn0041709 | yellow-g  | 62    | 21    | 3.5318    | 1.4720    | 0.0076 | -1.5159 | down |
| FBgn0037164 | CG11438   | 178   | 312   | 4.5958    | 8.2424    | 0.0007 | 0.8046  | up   |
| FBgn0051198 | CG31198   | 0     | 96    | 0.0213    | 2.1519    | 0.0000 | 6.4952  | up   |
| FBgn0085334 | CG34305   | 14    | 81    | 18.0699   | 94.0310   | 0.0000 | 2.4434  | up   |
| FBgn0038821 | CG17267   | 130   | 19    | 6.7295    | 1.0045    | 0.0000 | -2.7082 | down |
| FBgn0030439 | CG12716   | 103   | 3     | 4.4398    | 0.1708    | 0.0000 | -4.6756 | down |
| FBgn0032187 | CG4839    | 68    | 23    | 0.7554    | 0.3195    | 0.0031 | -1.5219 | down |
| FBgn0086677 | jeb       | 2881  | 4118  | 17.4867   | 23.2713   | 0.0034 | 0.5139  | up   |
| FBgn0033728 | Cpr49Ae   | 776   | 503   | 45.7538   | 30.3130   | 0.0010 | -0.6258 | down |
| FBgn0034331 | BomBc2    | 3351  | 1342  | 771.9170  | 359.2087  | 0.0000 | -1.3209 | down |
| FBgn0036015 | CG3088    | 16779 | 31137 | 1900.1300 | 3681.2500 | 0.0000 | 0.8906  | up   |
| FBgn0034328 | BomBc1    | 1036  | 1     | 323.4800  | 0.3227    | 0.0000 | -8.9657 | down |
| FBgn0041180 | Tep4      | 13072 | 5375  | 171.4275  | 72.5376   | 0.0000 | -1.2833 | down |
| FBgn0039152 | Root      | 881   | 211   | 6.7997    | 1.7238    | 0.0000 | -2.0577 | down |
| FBgn0037797 | CG12420   | 0     | 26    | 0.0000    | 2.9493    | 0.0000 | 4.6531  | up   |
| FBgn0250815 | Jon65Aiv  | 1     | 21    | 0.1733    | 2.0177    | 0.0084 | 3.4099  | up   |
| FBgn0034440 | CG10073   | 31    | 5     | 0.8745    | 0.1410    | 0.0095 | -2.4016 | down |
| FBgn0033052 | SCAP      | 1406  | 2674  | 17.0396   | 32.2499   | 0.0000 | 0.9255  | up   |
| FBgn0037443 | Dmtn      | 4068  | 2793  | 76.0316   | 55.9408   | 0.0009 | -0.5437 | down |
| FBgn0050489 | Cyp12d1-p | 57    | 10    | 2.2363    | 0.4379    | 0.0000 | -2.3918 | down |
| FBgn0026755 | Ugt37B1   | 52    | 3     | 2.1655    | 0.1314    | 0.0000 | -3.7041 | down |
| FBgn0015527 | peng      | 1011  | 519   | 27.3757   | 13.4083   | 0.0000 | -0.9619 | down |
| FBgn0047095 | CG33939   | 17    | 60    | 3.6420    | 11.6974   | 0.0011 | 1.7553  | up   |
| FBgn0043791 | phu       | 4094  | 237   | 151.8800  | 9.2372    | 0.0000 | -4.1057 | down |
| FBgn0034687 | CG11475   | 979   | 533   | 37.4009   | 21.5457   | 0.0000 | -0.8772 | down |
| FBgn0040828 | CG13306   | 2     | 43    | 0.6616    | 9.6501    | 0.0000 | 3.8399  | up   |
| FBgn0262574 | CG43114   | 126   | 51    | 263.8724  | 97.6733   | 0.0001 | -1.2883 | down |
| FBgn0259229 | CG42329   | 502   | 202   | 15.0442   | 7.9261    | 0.0000 | -1.3101 | down |
| FBgn0034802 | CNBP      | 1638  | 228   | 46.6269   | 5.7110    | 0.0000 | -2.8403 | down |
| FBgn0034394 | CG15096   | 2930  | 4159  | 121.8024  | 184.0544  | 0.0052 | 0.5038  | up   |
| FBgn0050428 | CG30428   | 162   | 325   | 4.0509    | 7.0538    | 0.0000 | 0.9983  | up   |
| FBgn0029823 | Shmt      | 2953  | 5291  | 120.5957  | 228.6004  | 0.0000 | 0.8398  | up   |
| FBgn0040682 | CG14664   | 26    | 2     | 1.5030    | 0.1068    | 0.0024 | -3.1391 | down |
| FBgn0264343 | CG43799   | 1     | 36    | 0.2015    | 3.2087    | 0.0000 | 4.1579  | up   |
| FBgn0028534 | CG7916    | 0     | 56    | 0.0884    | 5.2643    | 0.0000 | 5.7289  | up   |
| FBgn0042201 | Nplp3     | 7220  | 4900  | 1607.4600 | 1143.3700 | 0.0004 | -0.5605 | down |
| FBgn0050431 | CG30431   | 1014  | 641   | 35.2242   | 23.6190   | 0.0001 | -0.6621 | down |
| FBgn0035982 | CG4461    | 677   | 361   | 63.3133   | 34.6832   | 0.0000 | -0.9065 | down |
| FBgn0051664 | CG31664   | 271   | 104   | 9.2643    | 3.5992    | 0.0000 | -1.3739 | down |
| FBgn0038017 | CG4115    | 207   | 104   | 14.0771   | 7.3126    | 0.0002 | -0.9870 | down |
| FBgn0030590 | CG9518    | 52    | 8     | 0.8963    | 0.1361    | 0.0000 | -2.5492 | down |
| FBgn0031701 | TotM      | 208   | 69    | 45.7751   | 15.3988   | 0.0000 | -1.5784 | down |
| FBgn0027348 | bgm       | 2372  | 1055  | 57.2117   | 25.0712   | 0.0000 | -1.1694 | down |
| FBgn0000052 | Pfas      | 1982  | 3185  | 28.2030   | 47.6571   | 0.0000 | 0.6827  | up   |
| FBgn0036359 | CG14105   | 83    | 228   | 11.5027   | 30.9083   | 0.0000 | 1.4447  | up   |
| FBgn0085521 | CG40813   | 0     | 22    | 0.0000    | 3.4809    | 0.0004 | 4.4224  | up   |
| FBgn0039114 | Lsd-1     | 9628  | 3543  | 474.9345  | 180.1669  | 0.0000 | -1.4433 | down |
| FBgn0263256 | CG43394   | 436   | 653   | 9.7673    | 15.2657   | 0.0080 | 0.5802  | up   |
| FBgn0037288 | CG14661   | 3111  | 4871  | 215.8124  | 332.7273  | 0.0000 | 0.6453  | up   |
| FBgn0035921 | CG13305   | 808   | 264   | 27.1793   | 10.5932   | 0.0000 | -1.6112 | down |

|                   |           |      |      |          |          |        |         |      |
|-------------------|-----------|------|------|----------|----------|--------|---------|------|
| FBgn0033665       | Zip48C    | 242  | 402  | 8.9633   | 15.1636  | 0.0010 | 0.7283  | up   |
| FBgn0034071       | CG8405    | 2607 | 1730 | 47.7011  | 31.1526  | 0.0001 | -0.5927 | down |
| FBgn0032613       | NepI9     | 274  | 435  | 9.0598   | 14.3199  | 0.0041 | 0.6634  | up   |
| FBgn0036876       | CG9451    | 885  | 601  | 43.5850  | 29.4478  | 0.0060 | -0.5588 | down |
| FBgn0263974       | qin       | 85   | 18   | 0.8458   | 0.1789   | 0.0000 | -2.1752 | down |
| FBgn0038063       | Octbeta2R | 1377 | 2172 | 15.7442  | 21.9398  | 0.0000 | 0.6557  | up   |
| FBgn0031558       | CG16704   | 297  | 179  | 221.3586 | 124.0402 | 0.0061 | -0.7284 | down |
| FBgn0259998       | CG17571   | 1    | 40   | 0.1714   | 3.7105   | 0.0000 | 4.3057  | up   |
| FBgn0261714       | Cpn       | 4207 | 6449 | 117.3477 | 185.5137 | 0.0000 | 0.6148  | up   |
| FBgn0038295       | Gyc88E    | 679  | 418  | 9.4889   | 6.1475   | 0.0001 | -0.6998 | down |
| FBgn0037548       | CG7900    | 140  | 419  | 4.7352   | 14.2094  | 0.0000 | 1.5728  | up   |
| Trans_newGene_22  | -         | 105  | 204  | 2.9633   | 6.8697   | 0.0006 | 0.9497  | up   |
| Trans_newGene_37  | -         | 350  | 4    | 2.5222   | 0.0262   | 0.0000 | -6.1132 | down |
| Trans_newGene_85  | -         | 15   | 111  | 0.3973   | 2.4071   | 0.0000 | 2.8002  | up   |
| Trans_newGene_87  | -         | 311  | 1112 | 2.4693   | 8.4437   | 0.0000 | 1.8332  | up   |
| Trans_newGene_219 | -         | 119  | 228  | 13.4217  | 20.2327  | 0.0004 | 0.9305  | up   |
| Trans_newGene_313 | -         | 0    | 41   | 0.0000   | 0.6688   | 0.0000 | 5.2890  | up   |
| Trans_newGene_363 | -         | 40   | 3    | 2.2471   | 0.1665   | 0.0000 | -3.3343 | down |
| Trans_newGene_378 | -         | 621  | 175  | 6.1607   | 2.4058   | 0.0000 | -1.8222 | down |
| Trans_newGene_383 | -         | 60   | 157  | 0.7289   | 1.7315   | 0.0000 | 1.3706  | up   |
| Trans_newGene_384 | -         | 106  | 299  | 1.1714   | 3.0878   | 0.0000 | 1.4854  | up   |
| Trans_newGene_418 | -         | 4    | 125  | 0.2708   | 7.0878   | 0.0000 | 4.6334  | up   |
| Trans_newGene_420 | -         | 1143 | 1832 | 38.2904  | 61.8007  | 0.0000 | 0.6787  | up   |

| #ID         | gene_name  | w <sup>1118</sup> | ZT14_Count | 14-3-3ε <sup>EP3578</sup> | ZT14_Count | w <sup>1118</sup> | ZT14_FPKM | 14-3-3ε <sup>EP3578</sup> | ZT14_FPKM | FDR    | log2FC  | regulated |
|-------------|------------|-------------------|------------|---------------------------|------------|-------------------|-----------|---------------------------|-----------|--------|---------|-----------|
| FBgn0259795 | loopin-1   | 39                |            | 0                         |            | 1.4914            |           | 0.0000                    |           | 0.0000 | -5.1421 | down      |
| FBgn0067903 | IM18       | 103               |            | 19                        |            | 195.9760          |           | 37.1114                   |           | 0.0000 | -2.3877 | down      |
| FBgn0011770 | Gip        | 627               |            | 1092                      |            | 54.9950           |           | 95.0515                   |           | 0.0000 | 0.7812  | up        |
| FBgn0039325 | CG10560    | 458               |            | 1417                      |            | 21.7099           |           | 68.0286                   |           | 0.0000 | 1.6089  | up        |
| FBgn0039073 | CG4408     | 213               |            | 732                       |            | 9.4242            |           | 31.9554                   |           | 0.0000 | 1.7574  | up        |
| FBgn0040465 | Dlip3      | 424               |            | 236                       |            | 21.9111           |           | 12.1004                   |           | 0.0000 | -0.8603 | down      |
| FBgn0036105 | Blos4      | 118               |            | 33                        |            | 11.3770           |           | 3.2663                    |           | 0.0000 | -1.8207 | down      |
| FBgn0038739 | CG4686     | 256               |            | 445                       |            | 25.8328           |           | 44.0089                   |           | 0.0003 | 0.7769  | up        |
| FBgn0263200 | Galt       | 862               |            | 1862                      |            | 42.7608           |           | 91.1071                   |           | 0.0000 | 1.0920  | up        |
| FBgn0037713 | CG16790    | 325               |            | 712                       |            | 21.5303           |           | 50.1723                   |           | 0.0000 | 1.1106  | up        |
| FBgn0031859 | CG17377    | 25                |            | 2                         |            | 3.4138            |           | 0.2640                    |           | 0.0045 | -3.0703 | down      |
| FBgn0032402 | PLCXD      | 787               |            | 1310                      |            | 25.9776           |           | 41.2104                   |           | 0.0000 | 0.7162  | up        |
| FBgn0259145 | CG42260    | 1531              |            | 672                       |            | 11.4111           |           | 5.1019                    |           | 0.0000 | -1.2047 | down      |
| FBgn0038840 | Grik       | 549               |            | 307                       |            | 11.4538           |           | 6.2528                    |           | 0.0000 | -0.8543 | down      |
| FBgn0037396 | CG11459    | 151               |            | 48                        |            | 8.1710            |           | 2.6335                    |           | 0.0000 | -1.6482 | down      |
| FBgn0039543 | CROT       | 798               |            | 529                       |            | 24.9529           |           | 16.4057                   |           | 0.0029 | -0.6102 | down      |
| FBgn0016013 | Faa        | 340               |            | 749                       |            | 17.3866           |           | 38.0724                   |           | 0.0000 | 1.1187  | up        |
| FBgn0020299 | stumps     | 675               |            | 1112                      |            | 10.0241           |           | 15.7224                   |           | 0.0000 | 0.7011  | up        |
| FBgn0032264 | Lip4       | 660               |            | 364                       |            | 29.6569           |           | 14.8966                   |           | 0.0000 | -0.8746 | down      |
| FBgn0037687 | CG8132     | 205               |            | 412                       |            | 16.5033           |           | 32.7102                   |           | 0.0000 | 0.9849  | up        |
| FBgn0013279 | Hsp70Bc    | 46                |            | 3                         |            | 1.2176            |           | 0.0798                    |           | 0.0000 | -3.5234 | down      |
| FBgn0038986 | sit        | 106               |            | 38                        |            | 4.7664            |           | 1.7288                    |           | 0.0001 | -1.4705 | down      |
| FBgn0034480 | CG16898    | 1029              |            | 370                       |            | 56.8543           |           | 20.7183                   |           | 0.0000 | -1.4909 | down      |
| FBgn0030313 | Reep11     | 54                |            | 0                         |            | 5.3287            |           | 0.0000                    |           | 0.0000 | -5.6002 | down      |
| FBgn0013772 | Cyp6a8     | 857               |            | 560                       |            | 30.8243           |           | 20.1283                   |           | 0.0012 | -0.6309 | down      |
| FBgn0037537 | CG2767     | 2432              |            | 3958                      |            | 127.1150          |           | 204.5540                  |           | 0.0000 | 0.6842  | up        |
| FBgn0020621 | Pkn        | 7553              |            | 11140                     |            | 97.5140           |           | 172.4393                  |           | 0.0035 | 0.5424  | up        |
| FBgn0031418 | CG3609     | 1056              |            | 1603                      |            | 71.6848           |           | 106.6020                  |           | 0.0014 | 0.5835  | up        |
| FBgn0001208 | Hn         | 4045              |            | 6449                      |            | 199.5941          |           | 314.0726                  |           | 0.0000 | 0.6547  | up        |
| FBgn0000261 | Cat        | 6283              |            | 10157                     |            | 212.5950          |           | 335.4010                  |           | 0.0000 | 0.6747  | up        |
| FBgn0052037 | CG32037    | 93                |            | 32                        |            | 3.8781            |           | 1.3167                    |           | 0.0001 | -1.5238 | down      |
| FBgn0003651 | svp        | 1007              |            | 1479                      |            | 17.2341           |           | 25.0021                   |           | 0.0087 | 0.5359  | up        |
| FBgn0050499 | Rpe        | 329               |            | 562                       |            | 29.2734           |           | 47.9432                   |           | 0.0001 | 0.7523  | up        |
| FBgn0027070 | Ugt36E1    | 346               |            | 544                       |            | 14.9964           |           | 23.5141                   |           | 0.0059 | 0.6330  | up        |
| FBgn0039686 | CG15506    | 37                |            | 114                       |            | 1.9221            |           | 5.1414                    |           | 0.0000 | 1.5761  | up        |
| FBgn0029837 | Tsp5D      | 702               |            | 1046                      |            | 27.4839           |           | 40.8073                   |           | 0.0083 | 0.5565  | up        |
| FBgn0031080 | CG12655    | 342               |            | 29                        |            | 63.7377           |           | 5.4512                    |           | 0.0000 | -3.5266 | down      |
| FBgn0031545 | CG3213     | 25                |            | 0                         |            | 0.7143            |           | 0.0000                    |           | 0.0001 | -4.5232 | down      |
| FBgn0033499 | CG12914    | 401               |            | 228                       |            | 10.8950           |           | 6.1786                    |           | 0.0001 | -0.8295 | down      |
| FBgn0031097 | obst-A     | 219               |            | 107                       |            | 9.9948            |           | 4.2144                    |           | 0.0001 | -1.0435 | down      |
| FBgn0003390 | shf        | 236               |            | 614                       |            | 9.5608            |           | 24.6835                   |           | 0.0000 | 1.3571  | up        |
| FBgn0050263 | stum       | 68                |            | 243                       |            | 1.7931            |           | 3.4556                    |           | 0.0000 | 1.8021  | up        |
| FBgn0038665 | euc        | 540               |            | 882                       |            | 156.4780          |           | 255.6885                  |           | 0.0001 | 0.6885  | up        |
| FBgn0267398 | Yeti       | 938               |            | 1481                      |            | 78.4531           |           | 132.4385                  |           | 0.0002 | 0.6402  | up        |
| FBgn0036824 | CG3902     | 1976              |            | 3893                      |            | 90.7644           |           | 173.9690                  |           | 0.0000 | 0.9598  | up        |
| FBgn0039081 | Irk2       | 1673              |            | 2445                      |            | 59.9678           |           | 87.6879                   |           | 0.0064 | 0.5290  | up        |
| FBgn0259992 | CG42489    | 20                |            | 64                        |            | 11.0525           |           | 34.4889                   |           | 0.0029 | 1.6059  | up        |
| FBgn0027552 | CG10863    | 3648              |            | 6053                      |            | 258.0830          |           | 426.0060                  |           | 0.0000 | 0.7122  | up        |
| FBgn0086558 | Ubi-p5E    | 9888              |            | 3198                      |            | 295.7020          |           | 91.1233                   |           | 0.0000 | -1.6463 | down      |
| FBgn0037746 | CG8478     | 56                |            | 18                        |            | 1.7480            |           | 0.5635                    |           | 0.0092 | -1.5951 | down      |
| FBgn0023178 | Pdf        | 1640              |            | 1007                      |            | 236.0200          |           | 143.5690                  |           | 0.0000 | -0.7211 | down      |
| FBgn0002868 | MtnA       | 6307              |            | 9350                      |            | 4939.5980         |           | 7680.2990                 |           | 0.0023 | 0.5498  | up        |
| FBgn0051955 | CG31955    | 36                |            | 5                         |            | 3.0325            |           | 0.4915                    |           | 0.0007 | -2.6121 | down      |
| FBgn0038339 | CG6118     | 0                 |            | 25                        |            | 0.0000            |           | 0.4107                    |           | 0.0001 | 4.5059  | up        |
| FBgn0028970 | betaggt-II | 597               |            | 906                       |            | 35.3259           |           | 51.9851                   |           | 0.0050 | 0.5827  | up        |
| FBgn0034356 | Pepck2     | 83                |            | 473                       |            | 2.0358            |           | 12.0053                   |           | 0.0000 | 2.4764  | up        |
| FBgn0004513 | Mdr65      | 1673              |            | 1170                      |            | 26.4947           |           | 18.4925                   |           | 0.0078 | -0.5336 | down      |
| FBgn0040609 | CG3348     | 146               |            | 59                        |            | 30.2725           |           | 12.3646                   |           | 0.0000 | -1.3086 | down      |
| FBgn0037895 | CG6723     | 274               |            | 459                       |            | 11.0283           |           | 18.0328                   |           | 0.0010 | 0.7238  | up        |
| FBgn0032647 | CG15143    | 11                |            | 57                        |            | 0.1710            |           | 0.8747                    |           | 0.0000 | 2.2423  | up        |
| FBgn0038142 | CheA87a    | 298               |            | 61                        |            | 46.7697           |           | 9.7385                    |           | 0.0000 | -2.2851 | down      |
| FBgn0010387 | Acbp2      | 707               |            | 1086                      |            | 430.3374          |           | 662.1674                  |           | 0.0017 | 0.6003  | up        |
| FBgn0040323 | GNBP1      | 421               |            | 250                       |            | 15.6783           |           | 9.2660                    |           | 0.0004 | -0.7673 | down      |
| FBgn0031850 | Tsp        | 2872              |            | 4376                      |            | 95.2733           |           | 143.5138                  |           | 0.0004 | 0.5892  | up        |
| FBgn0032350 | CG6287     | 3309              |            | 5449                      |            | 197.5710          |           | 317.7690                  |           | 0.0000 | 0.7013  | up        |
| FBgn0036619 | Cpr72Ec    | 775               |            | 2867                      |            | 30.7999           |           | 112.4460                  |           | 0.0000 | 1.8676  | up        |
| FBgn0038516 | P5cr-2     | 114               |            | 247                       |            | 9.7308            |           | 20.8395                   |           | 0.0000 | 1.0897  | up        |
| FBgn0035817 | CG7409     | 1305              |            | 775                       |            | 178.5540          |           | 105.4550                  |           | 0.0000 | -0.7690 | down      |
| FBgn0033942 | Cpr51A     | 114               |            | 4                         |            | 18.5230           |           | 0.6559                    |           | 0.0000 | -4.5005 | down      |
| FBgn0035831 | Pop4       | 132               |            | 58                        |            | 13.0782           |           | 5.7802                    |           | 0.0004 | -1.1886 | down      |
| FBgn0030607 | dob        | 341               |            | 749                       |            | 12.5443           |           | 27.2686                   |           | 0.0000 | 1.1145  | up        |
| FBgn0028482 | bdl        | 5107              |            | 8525                      |            | 151.1162          |           | 244.8090                  |           | 0.0000 | 0.7210  | up        |
| FBgn0023477 | Taldo      | 2812              |            | 5112                      |            | 203.3960          |           | 359.8030                  |           | 0.0000 | 0.8439  | up        |
| FBgn0038795 | CG4335     | 226               |            | 506                       |            | 14.4961           |           | 32.3733                   |           | 0.0000 | 1.1407  | up        |
| FBgn0010288 | Uch        | 497               |            | 825                       |            | 36.7245           |           | 60.2352                   |           | 0.0001 | 0.7117  | up        |
| FBgn0042175 | CG18858    | 325               |            | 563                       |            | 12.2329           |           | 21.2140                   |           | 0.0001 | 0.7725  | up        |
| FBgn0035550 | CG11349    | 23                |            | 1                         |            | 0.8836            |           | 0.0385                    |           | 0.0026 | -3.5063 | down      |
| FBgn0027073 | Ugt49B1    | 410               |            | 710                       |            | 16.5027           |           | 28.5042                   |           | 0.0000 | 0.7724  | up        |
| FBgn0023530 | CG3740     | 852               |            | 1354                      |            | 39.5604           |           | 49.2075                   |           | 0.0002 | 0.6495  | up        |
| FBgn0032281 | CG17107    | 84                |            | 242                       |            | 39.5378           |           | 112.6030                  |           | 0.0000 | 1.4959  | up        |
| FBgn0264090 | CG43759    | 321               |            | 175                       |            | 2.9506            |           | 1.6353                    |           | 0.0001 | -0.8890 | down      |
| FBgn0033158 | CG12164    | 9                 |            | 43                        |            | 0.4561            |           | 2.0773                    |           | 0.0026 | 2.1047  | up        |
| FBgn0039685 | Obp99b     | 8865              |            | 4818                      |            | 2055.7807         |           | 1106.1007                 |           | 0.0000 | -0.8977 | down      |
| FBgn0035942 | ValRS-m    | 353               |            | 218                       |            | 7.3925            |           | 4.5272                    |           | 0.0051 | -0.7105 | down      |
| FBgn0262150 | CG42876    | 63                |            | 5                         |            | 2.9502            |           | 0.3244                    |           | 0.0000 | -3.4004 | down      |
| FBgn0033366 | Ance-4     | 586               |            | 932                       |            | 23.1418           |           | 36.0278                   |           | 0.0005 | 0.6503  | up        |
| FBgn0039722 | Capa       | 1644              |            | 1023                      |            | 239.0550          |           | 147.4600                  |           | 0.0000 | -0.7019 | down      |
| FBgn0038056 | CG5961     | 513               |            | 247                       |            | 23.3252           |           | 12.2994                   |           | 0.0000 | -1.0691 | down      |
| FBgn0051453 | pch2       | 75                |            | 158                       |            | 3.0297            |           | 6.1847                    |           | 0.0012 | 1.0456  | up        |
| FBgn0005391 | Yp2        | 19                |            | 105                       |            | 0.8942            |           | 4.8270                    |           | 0.0000 | 2.3801  | up        |
| FBgn0033020 | COX4L      | 2                 |            | 26                        |            | 0.4412            |           | 1.5322                    |           | 0.0033 | 3.0956  | up        |

|             |         |       |       |           |           |        |         |      |
|-------------|---------|-------|-------|-----------|-----------|--------|---------|------|
| FBgn0038292 | CG3987  | 16    | 97    | 0.8034    | 4.8080    | 0.0000 | 2.4998  | up   |
| FBgn0035941 | CG13313 | 65    | 6     | 3.8923    | 0.3579    | 0.0000 | -3.2274 | down |
| FBgn0013813 | Dhc98D  | 58    | 423   | 0.2522    | 1.7876    | 0.0000 | 2.8243  | up   |
| FBgn0029950 | CG9657  | 368   | 584   | 11.2617   | 18.4633   | 0.0031 | 0.6465  | up   |
| FBgn0030060 | CG2004  | 787   | 1170  | 34.5779   | 51.4720   | 0.0073 | 0.5533  | up   |
| FBgn0260874 | Ir76a   | 207   | 389   | 8.6165    | 16.2078   | 0.0000 | 0.8884  | up   |
| FBgn0034329 | BomS1   | 860   | 452   | 477.3800  | 252.7710  | 0.0000 | -0.9444 | down |
| FBgn0031601 | Dim1    | 77    | 166   | 15.7088   | 33.8293   | 0.0004 | 1.0790  | up   |
| FBgn0039299 | CG11854 | 27    | 1     | 2.0703    | 0.0752    | 0.0002 | -3.7275 | down |
| FBgn0036547 | CG17032 | 626   | 332   | 36.3616   | 18.2741   | 0.0000 | -0.9307 | down |
| FBgn0044047 | Ilp6    | 449   | 766   | 21.5386   | 30.9751   | 0.0000 | 0.7510  | up   |
| FBgn0010225 | Gel     | 8622  | 12845 | 187.0559  | 273.6998  | 0.0020 | 0.5569  | up   |
| FBgn0042178 | Apl     | 65    | 220   | 1.1719    | 3.9145    | 0.0000 | 1.7234  | up   |
| FBgn0038682 | CG5835  | 274   | 577   | 16.0937   | 33.2289   | 0.0000 | 1.0532  | up   |
| FBgn0003082 | phr     | 65    | 653   | 2.5429    | 25.2961   | 0.0000 | 3.2880  | up   |
| FBgn0004629 | Cys     | 4025  | 8089  | 1332.8500 | 2683.2700 | 0.0000 | 0.9886  | up   |
| FBgn0039782 | CG15539 | 55    | 11    | 2.3569    | 0.5033    | 0.0000 | -2.2260 | down |
| FBgn0031012 | CG8051  | 190   | 351   | 5.8517    | 10.7946   | 0.0001 | 0.8635  | up   |
| FBgn0038002 | CG12256 | 43    | 8     | 4.0314    | 0.7544    | 0.0006 | -2.2881 | down |
| FBgn0004403 | RpS14a  | 11364 | 17340 | 1788.1518 | 2825.9433 | 0.0005 | 0.5915  | up   |
| FBgn0036290 | CG10638 | 794   | 1340  | 52.1618   | 86.1469   | 0.0000 | 0.7361  | up   |
| FBgn0022774 | Oat     | 509   | 877   | 26.4098   | 44.3144   | 0.0000 | 0.7655  | up   |
| FBgn0030157 | CG1468  | 893   | 1477  | 107.1630  | 176.7600  | 0.0000 | 0.7071  | up   |
| FBgn0035766 | eco     | 504   | 1563  | 8.6792    | 26.9935   | 0.0000 | 1.6125  | up   |
| FBgn0031563 | CG10031 | 432   | 678   | 87.9893   | 138.8130  | 0.0028 | 0.6308  | up   |
| FBgn0036774 | mRpS26  | 326   | 199   | 38.4741   | 22.9815   | 0.0052 | -0.7269 | down |
| FBgn0032652 | CG6870  | 2785  | 4378  | 265.5395  | 410.5554  | 0.0000 | 0.6343  | up   |
| FBgn0033065 | Cyp6w1  | 3614  | 7098  | 131.0257  | 257.9996  | 0.0000 | 0.9555  | up   |
| FBgn0010403 | Obp83b  | 146   | 35    | 37.3186   | 9.0868    | 0.0000 | -2.0432 | down |
| FBgn0016075 | vkq     | 2344  | 3564  | 23.7690   | 35.2011   | 0.0005 | 0.5862  | up   |
| FBgn0002865 | Mst98Ca | 39    | 6     | 2.7117    | 0.4083    | 0.0005 | -2.5068 | down |
| FBgn0000206 | boss    | 3597  | 5447  | 87.3645   | 130.8242  | 0.0006 | 0.5804  | up   |
| FBgn0050419 | CG30419 | 671   | 434   | 9.3917    | 6.1553    | 0.0017 | -0.6454 | down |
| FBgn0015035 | Cyp4e3  | 634   | 271   | 24.0019   | 10.3252   | 0.0000 | -1.2408 | down |
| FBgn0053138 | AGBE    | 1566  | 2638  | 47.8313   | 78.6867   | 0.0000 | 0.7338  | up   |
| FBgn0037607 | CG8036  | 4624  | 10393 | 149.5930  | 326.0811  | 0.0000 | 1.1501  | up   |
| FBgn0036560 | CG5895  | 692   | 1258  | 30.4947   | 55.2050   | 0.0000 | 0.8431  | up   |
| FBgn0000500 | Dsk     | 2121  | 1020  | 456.8620  | 220.5840  | 0.0000 | -1.0735 | down |
| FBgn0085419 | Rgk2    | 1652  | 980   | 21.7193   | 12.8054   | 0.0000 | -0.7708 | down |
| FBgn0037304 | CG1113  | 86    | 15    | 3.0410    | 0.5566    | 0.0000 | -2.4498 | down |
| FBgn0040349 | CG3699  | 409   | 2153  | 45.8751   | 234.6660  | 0.0000 | 2.3748  | up   |
| FBgn0003076 | Pgml    | 3165  | 4670  | 122.0470  | 176.7560  | 0.0028 | 0.5429  | up   |
| FBgn0036679 | CG13022 | 51    | 15    | 8.9785    | 2.6608    | 0.0081 | -1.7088 | down |
| FBgn0034564 | CG9344  | 20    | 83    | 7.0270    | 29.3896   | 0.0000 | 1.9751  | up   |
| FBgn0045770 | S-Lap3  | 49    | 2     | 1.3901    | 0.0692    | 0.0000 | -4.0101 | down |
| FBgn0028983 | Spn55B  | 442   | 173   | 25.1103   | 9.6692    | 0.0000 | -1.3655 | down |
| FBgn0065108 | ppk16   | 36    | 6     | 0.7064    | 0.1544    | 0.0023 | -2.3948 | down |
| FBgn0011282 | Obp84a  | 22    | 0     | 4.0161    | 0.0000    | 0.0005 | -4.3474 | down |
| FBgn0034468 | Obp56a  | 72    | 186   | 15.2292   | 39.5714   | 0.0000 | 1.3374  | up   |
| FBgn0038160 | CG9759  | 537   | 292   | 36.3032   | 19.6293   | 0.0000 | -0.8945 | down |
| FBgn0039697 | CG7834  | 2938  | 4633  | 225.1290  | 343.8853  | 0.0000 | 0.6388  | up   |
| FBgn0033760 | CG8785  | 224   | 98    | 8.3790    | 3.6131    | 0.0000 | -1.2012 | down |
| FBgn0010591 | Sply    | 931   | 1375  | 33.1968   | 48.0856   | 0.0075 | 0.5439  | up   |
| FBgn0031360 | CG31937 | 879   | 1384  | 59.9439   | 92.5311   | 0.0002 | 0.6361  | up   |
| FBgn0023507 | D2hgdh  | 2420  | 7079  | 82.3466   | 232.7558  | 0.0000 | 1.5300  | up   |
| FBgn0010019 | Cyp4g1  | 186   | 9     | 5.7440    | 0.2800    | 0.0000 | -4.2225 | down |
| FBgn0038981 | CG5346  | 683   | 1182  | 22.9158   | 39.5602   | 0.0000 | 0.7721  | up   |
| FBgn0024289 | Sodh-1  | 1636  | 4433  | 111.6033  | 299.9469  | 0.0000 | 1.4194  | up   |
| FBgn0040074 | retinin | 14653 | 23346 | 1742.9200 | 2712.4900 | 0.0000 | 0.6538  | up   |
| FBgn0082831 | pps     | 2111  | 3139  | 17.8809   | 26.3936   | 0.0021 | 0.5540  | up   |
| FBgn0046294 | CG12699 | 31    | 1     | 3.6529    | 0.1166    | 0.0000 | -3.9193 | down |
| FBgn0028490 | CG31705 | 6749  | 11988 | 211.9359  | 369.7266  | 0.0000 | 0.8106  | up   |
| FBgn0040211 | hgo     | 312   | 577   | 14.9683   | 27.5236   | 0.0000 | 0.8665  | up   |
| FBgn0034660 | Lox12   | 360   | 784   | 14.9126   | 32.0326   | 0.0000 | 1.1023  | up   |
| FBgn0043783 | CG32444 | 3405  | 2186  | 192.3690  | 121.4100  | 0.0000 | -0.6572 | down |
| FBgn0263780 | CG17684 | 882   | 446   | 12.7314   | 7.2458    | 0.0000 | -1.0000 | down |
| FBgn0042177 | Arts    | 693   | 388   | 11.7474   | 6.5136    | 0.0000 | -0.8530 | down |
| FBgn0063496 | GstE4   | 56    | 16    | 6.3265    | 1.7823    | 0.0023 | -1.7543 | down |
| FBgn0033574 | Spn47C  | 443   | 938   | 20.8686   | 43.8510   | 0.0000 | 1.0622  | up   |
| FBgn0261041 | stj     | 9287  | 4538  | 97.7213   | 47.2876   | 0.0000 | -1.0511 | down |
| FBgn0040732 | CG16926 | 3315  | 1007  | 280.9009  | 84.6930   | 0.0000 | -1.7359 | down |
| FBgn0014031 | Spat    | 1000  | 1655  | 53.6603   | 86.2653   | 0.0000 | 0.7081  | up   |
| FBgn0053105 | p24-2   | 11    | 821   | 0.2753    | 58.8633   | 0.0000 | 6.0638  | up   |
| FBgn0086698 | frtz    | 260   | 447   | 4.8155    | 8.0787    | 0.0004 | 0.7610  | up   |
| FBgn0040900 | CG17777 | 98    | 15    | 22.5953   | 3.1870    | 0.0000 | -2.6359 | down |
| FBgn0050083 | CG30083 | 19    | 82    | 1.7998    | 7.6993    | 0.0000 | 2.0278  | up   |
| FBgn0250907 | Ch10    | 142   | 57    | 1.2626    | 0.5191    | 0.0000 | -1.3176 | down |
| FBgn0013812 | Dhc93AB | 173   | 40    | 0.7262    | 0.1690    | 0.0000 | -2.0994 | down |
| FBgn0052726 | CG32726 | 625   | 340   | 810.6744  | 436.0094  | 0.0000 | -0.8942 | down |
| FBgn0085256 | CG34227 | 933   | 1889  | 283.4640  | 571.0540  | 0.0000 | 0.9987  | up   |
| FBgn0031389 | CG4259  | 91    | 39    | 5.2192    | 2.4049    | 0.0079 | -1.2165 | down |
| FBgn0037228 | CG1092  | 469   | 775   | 17.0026   | 24.8292   | 0.0001 | 0.7051  | up   |
| FBgn0030425 | Nep6    | 936   | 1729  | 26.4533   | 49.8263   | 0.0000 | 0.8664  | up   |
| FBgn0027620 | Acf     | 674   | 225   | 7.5344    | 2.5459    | 0.0000 | -1.5960 | down |
| FBgn0067779 | dbf     | 1105  | 605   | 15.4071   | 8.7170    | 0.0000 | -0.8859 | down |
| FBgn0001187 | Hex-C   | 1125  | 2555  | 51.2039   | 114.1630  | 0.0000 | 1.1645  | up   |
| FBgn0034471 | Obp56e  | 887   | 1888  | 219.1500  | 465.5611  | 0.0000 | 1.0708  | up   |
| FBgn0051036 | CG31036 | 254   | 611   | 4.7284    | 11.1741   | 0.0000 | 1.2445  | up   |
| FBgn0034437 | CG10051 | 1     | 24    | 0.0530    | 0.6673    | 0.0018 | 3.5391  | up   |
| FBgn0034618 | CG9485  | 783   | 1430  | 10.5641   | 18.9964   | 0.0000 | 0.8499  | up   |
| FBgn0032076 | Argl    | 801   | 1590  | 43.2590   | 78.4679   | 0.0000 | 0.9700  | up   |
| FBgn0031824 | CG9547  | 209   | 382   | 10.8621   | 19.4294   | 0.0001 | 0.8485  | up   |

|             |             |       |       |           |           |        |         |      |
|-------------|-------------|-------|-------|-----------|-----------|--------|---------|------|
| FBgn0000047 | Act88F      | 47    | 109   | 2.3404    | 5.2936    | 0.0034 | 1.1761  | up   |
| FBgn0040364 | CG11378     | 986   | 570   | 57.9594   | 32.8672   | 0.0000 | -0.8075 | down |
| FBgn0035583 | CG13704     | 107   | 375   | 16.6566   | 57.6708   | 0.0000 | 1.7803  | up   |
| FBgn0029922 | CG14431     | 817   | 535   | 8.6031    | 5.6849    | 0.0015 | -0.6278 | down |
| FBgn0038865 | cDIP        | 366   | 591   | 13.3424   | 21.1755   | 0.0014 | 0.6715  | up   |
| FBgn0033354 | FANCI       | 90    | 37    | 1.3200    | 0.5425    | 0.0042 | -1.2744 | down |
| FBgn0035266 | Gk2         | 692   | 1033  | 22.0868   | 31.9436   | 0.0078 | 0.5591  | up   |
| FBgn0015039 | Cyp9b2      | 1455  | 2970  | 60.4922   | 121.8560  | 0.0000 | 1.0107  | up   |
| FBgn0036757 | Ir75a       | 114   | 1     | 3.8236    | 0.0340    | 0.0000 | -5.7603 | down |
| FBgn0260793 | 2mit        | 2658  | 1832  | 15.8153   | 11.1238   | 0.0022 | -0.5548 | down |
| FBgn0040817 | CG14132     | 209   | 546   | 19.4022   | 50.1237   | 0.0000 | 1.3625  | up   |
| FBgn0038761 | CG17190     | 259   | 95    | 25.4314   | 9.3079    | 0.0000 | -1.4540 | down |
| FBgn0031169 | CG1494      | 191   | 10    | 2.3913    | 0.1239    | 0.0000 | -4.1250 | down |
| FBgn0025583 | BomS2       | 1754  | 588   | 1009.1800 | 344.7760  | 0.0000 | -1.5930 | down |
| FBgn0038820 | CG4000      | 3201  | 937   | 288.7060  | 82.4894   | 0.0000 | -1.7893 | down |
| FBgn0037846 | CG6574      | 3169  | 2055  | 124.8072  | 84.2345   | 0.0000 | -0.6427 | down |
| FBgn0058042 |             | 1218  | 2073  | 104.8150  | 179.8760  | 0.0000 | 0.7485  | up   |
| FBgn0032507 | CG9377      | 443   | 1130  | 32.4183   | 81.6328   | 0.0000 | 1.3306  | up   |
| FBgn0050145 | Obp57e      | 32    | 0     | 13.4574   | 0.0000    | 0.0000 | -4.8656 | down |
| FBgn0052856 | CG32856     | 72    | 22    | 14.8011   | 5.2278    | 0.0003 | -1.6776 | down |
| FBgn0000477 | DNaseII     | 946   | 1615  | 59.6366   | 100.4110  | 0.0000 | 0.7528  | up   |
| FBgn0044050 | Ilp3        | 67    | 12    | 7.7580    | 1.3870    | 0.0000 | -2.3914 | down |
| FBgn0010226 | GstS1       | 1705  | 2513  | 83.9634   | 123.4044  | 0.0040 | 0.5412  | up   |
| FBgn0032921 | Mpp6        | 121   | 52    | 12.4185   | 6.7017    | 0.0006 | -1.2185 | down |
| FBgn0035205 | Ctr9        | 2073  | 3726  | 33.1443   | 59.1263   | 0.0000 | 0.8274  | up   |
| FBgn0035978 | UGP         | 2287  | 3972  | 69.7206   | 124.3928  | 0.0000 | 0.7780  | up   |
| FBgn0000055 | Adh         | 50726 | 87035 | 3968.3251 | 6649.1576 | 0.0000 | 0.7607  | up   |
| FBgn0026565 | Ass         | 131   | 235   | 6.9859    | 12.6788   | 0.0049 | 0.8195  | up   |
| FBgn0030187 | Ipod        | 23    | 1     | 1.1002    | 0.0549    | 0.0026 | -3.5063 | down |
| FBgn0032322 | CG16743     | 164   | 390   | 24.3638   | 57.1766   | 0.0000 | 1.2259  | up   |
| FBgn0033302 | Cyp6a14     | 98    | 37    | 3.2234    | 0.8327    | 0.0004 | -1.3958 | down |
| FBgn0052698 | CARPB       | 845   | 550   | 14.6393   | 8.6588    | 0.0010 | -0.6366 | down |
| FBgn0000163 | baz         | 3000  | 2051  | 16.4451   | 13.6339   | 0.0012 | -0.5665 | down |
| FBgn0025885 | Inos        | 10201 | 16115 | 384.0000  | 587.7550  | 0.0000 | 0.6415  | up   |
| FBgn0023520 | CG3857      | 1041  | 670   | 30.3895   | 19.4896   | 0.0003 | -0.6530 | down |
| FBgn0033926 | Arc1        | 12985 | 4126  | 349.8440  | 110.2140  | 0.0000 | -1.6719 | down |
| FBgn0036783 | CheA75a     | 78    | 19    | 10.8042   | 2.6642    | 0.0000 | -1.9916 | down |
| FBgn0037684 | Srr         | 275   | 476   | 13.1245   | 21.7506   | 0.0002 | 0.7709  | up   |
| FBgn0083956 | CG34120     | 5389  | 8220  | 46.3985   | 68.6380   | 0.0003 | 0.5909  | up   |
| FBgn0039348 | Npl4        | 2263  | 1458  | 70.7686   | 44.9403   | 0.0000 | -0.6520 | down |
| FBgn0004959 | phm         | 68    | 18    | 2.4270    | 0.6533    | 0.0001 | -1.8702 | down |
| FBgn0037845 | CG14694     | 186   | 87    | 10.6595   | 4.9435    | 0.0001 | -1.1042 | down |
| FBgn0039848 | Lox1l       | 535   | 836   | 25.3005   | 40.4578   | 0.0016 | 0.6248  | up   |
| FBgn0035957 | CG5144      | 48    | 3     | 2.8597    | 0.1793    | 0.0000 | -3.5834 | down |
| FBgn0031646 | sns1        | 98    | 15    | 7.0529    | 1.2873    | 0.0000 | -2.6359 | down |
| FBgn0012042 | AttA        | 365   | 1614  | 34.5813   | 159.8007  | 0.0000 | 2.1231  | up   |
| FBgn0037709 | CG8199      | 180   | 421   | 7.1134    | 16.4820   | 0.0000 | 1.2026  | up   |
| FBgn0259985 | Mppe        | 2313  | 3580  | 97.1341   | 151.8944  | 0.0002 | 0.6118  | up   |
| FBgn0265274 | Inx3        | 947   | 1526  | 32.7566   | 52.5599   | 0.0000 | 0.6695  | up   |
| FBgn0069973 | CG40485     | 2534  | 4069  | 129.0802  | 208.4698  | 0.0000 | 0.6649  | up   |
| FBgn0086907 | Cyt-c-d     | 30    | 121   | 3.2436    | 12.9288   | 0.0000 | 1.9539  | up   |
| FBgn0085485 | CG34456     | 8     | 253   | 1.7439    | 47.6702   | 0.0000 | 4.7798  | up   |
| FBgn0038681 | Cyp12a4     | 1208  | 1857  | 50.1880   | 76.7277   | 0.0005 | 0.6018  | up   |
| FBgn0040256 | Ugt35C1     | 528   | 1305  | 23.5221   | 57.9883   | 0.0000 | 1.2855  | up   |
| FBgn0035194 | Psfl        | 55    | 9     | 7.7237    | 1.2521    | 0.0000 | -2.4855 | down |
| FBgn0034132 | S-Lap8      | 34    | 3     | 1.2300    | 0.1067    | 0.0001 | -3.0996 | down |
| FBgn0039104 | CG10252     | 38    | 0     | 4.1878    | 0.0000    | 0.0000 | -5.1057 | down |
| FBgn0058178 |             | 3468  | 2368  | 81.9398   | 57.2537   | 0.0011 | -0.5683 | down |
| FBgn0038291 | CG3984      | 54    | 890   | 2.8224    | 45.5040   | 0.0000 | 3.9965  | up   |
| FBgn0040827 | CG13315     | 2829  | 1592  | 484.6960  | 278.7274  | 0.0000 | -0.8471 | down |
| FBgn0266369 | Mtp         | 1073  | 1616  | 21.7714   | 32.7455   | 0.0021 | 0.5721  | up   |
| FBgn0000406 | Cyt-b5-r    | 4249  | 9247  | 207.3161  | 447.3381  | 0.0000 | 1.1035  | up   |
| FBgn0036316 | nebu        | 3177  | 4731  | 70.6302   | 112.0905  | 0.0016 | 0.5562  | up   |
| FBgn0036992 | Hpd         | 1249  | 3508  | 75.5579   | 207.4062  | 0.0000 | 1.4709  | up   |
| FBgn0038412 | Zip89B      | 275   | 528   | 9.7621    | 18.4989   | 0.0000 | 0.9202  | up   |
| FBgn0027571 |             | 18066 | 32839 | 138.2493  | 245.5309  | 0.0000 | 0.8440  | up   |
| FBgn0026721 | fat-spondin | 2385  | 3450  | 69.5743   | 98.3833   | 0.0094 | 0.5143  | up   |
| FBgn0051374 | sals        | 1136  | 770   | 20.3651   | 13.6684   | 0.0032 | -0.5785 | down |
| FBgn0035575 | CG7509      | 86    | 247   | 2.7762    | 7.9054    | 0.0000 | 1.4917  | up   |
| FBgn0037298 | Sccpdh1     | 4940  | 2976  | 221.7491  | 130.5721  | 0.0000 | -0.7490 | down |
| FBgn0030159 | CG9689      | 1139  | 689   | 141.6624  | 70.1960   | 0.0000 | -0.7424 | down |
| FBgn0039678 | Obp99a      | 26    | 2     | 6.4803    | 0.4849    | 0.0025 | -3.1245 | down |
| FBgn0031860 | CG11236     | 120   | 369   | 8.1463    | 24.7841   | 0.0000 | 1.5933  | up   |
| FBgn0010385 | Def         | 11    | 82    | 5.8101    | 41.4895   | 0.0000 | 2.7582  | up   |
| FBgn0025454 | Cyp6g1      | 3024  | 7475  | 110.6051  | 268.6622  | 0.0000 | 1.2872  | up   |
| FBgn0036731 | CG6333      | 43    | 7     | 1.9504    | 0.3068    | 0.0002 | -2.4551 | down |
| FBgn0051469 | CG31469     | 28    | 185   | 5.9740    | 38.6900   | 0.0000 | 2.6574  | up   |
| FBgn0037057 | CG10512     | 755   | 1134  | 30.3734   | 46.6352   | 0.0048 | 0.5680  | up   |
| FBgn0032029 | CG17292     | 411   | 779   | 18.1024   | 35.0754   | 0.0000 | 0.9025  | up   |
| FBgn0036436 | CG4914      | 46    | 1     | 1.9886    | 0.0437    | 0.0000 | -4.4719 | down |
| FBgn0033421 | CG1888      | 464   | 747   | 22.4950   | 33.7354   | 0.0006 | 0.6675  | up   |
| FBgn0031313 | CG5080      | 1758  | 2754  | 58.6657   | 88.8578   | 0.0001 | 0.6291  | up   |
| FBgn0030921 | CG6290      | 1002  | 420   | 122.4580  | 50.4705   | 0.0000 | -1.2702 | down |
| FBgn0035206 | sturkopf    | 509   | 987   | 26.0068   | 49.9841   | 0.0000 | 0.9357  | up   |
| FBgn0040321 | GNBP3       | 1214  | 1799  | 57.5531   | 84.3361   | 0.0042 | 0.5489  | up   |
| FBgn0032908 | CG9270      | 13    | 97    | 0.2065    | 1.4965    | 0.0000 | 2.7774  | up   |
| FBgn0025456 | CREG        | 250   | 452   | 25.4761   | 44.7835   | 0.0000 | 0.8334  | up   |
| FBgn0032287 | CG6415      | 493   | 749   | 31.2042   | 46.6112   | 0.0082 | 0.5841  | up   |
| FBgn0035282 | CNMa        | 273   | 59    | 10.1896   | 2.4486    | 0.0000 | -2.2064 | down |
| FBgn0036787 | CG4306      | 293   | 473   | 23.3760   | 37.7795   | 0.0038 | 0.6707  | up   |
| FBgn0261436 | DhpD        | 689   | 1112  | 30.4901   | 48.5559   | 0.0001 | 0.6716  | up   |
| FBgn0036875 | CG9449      | 408   | 644   | 16.9579   | 26.1337   | 0.0026 | 0.6389  | up   |

|             |          |       |       |           |           |        |         |      |
|-------------|----------|-------|-------|-----------|-----------|--------|---------|------|
| FBgn0037975 | CG3397   | 317   | 627   | 20.0567   | 39.0562   | 0.0000 | 0.9633  | up   |
| FBgn0038179 | CG9312   | 475   | 864   | 56.4244   | 101.0860  | 0.0000 | 0.8434  | up   |
| FBgn0031515 | CG9664   | 610   | 993   | 15.2063   | 24.0085   | 0.0001 | 0.6838  | up   |
| FBgn0032124 | CG17855  | 48    | 10    | 1.8668    | 0.4012    | 0.0005 | -2.1578 | down |
| FBgn0005626 | ple      | 1305  | 746   | 23.8224   | 13.0060   | 0.0000 | -0.8240 | down |
| FBgn0035147 | Gale     | 1490  | 2293  | 70.7135   | 107.7810  | 0.0004 | 0.6034  | up   |
| FBgn0001114 | Glt      | 3679  | 6402  | 79.4368   | 136.7531  | 0.0000 | 0.7809  | up   |
| FBgn0038385 | Fbx17    | 205   | 340   | 4.5519    | 7.0163    | 0.0070 | 0.7087  | up   |
| FBgn0034417 | CG15117  | 233   | 428   | 6.6783    | 12.4658   | 0.0000 | 0.8560  | up   |
| FBgn0036597 | CG4962   | 1455  | 187   | 180.9160  | 22.9123   | 0.0000 | -2.9703 | down |
| FBgn0039312 | CG10514  | 80    | 207   | 4.7030    | 12.0123   | 0.0000 | 1.3411  | up   |
| FBgn0027521 | CG3679   | 668   | 995   | 29.9724   | 44.1630   | 0.0094 | 0.5559  | up   |
| FBgn0050409 | CR30409  | 424   | 756   | 35.8965   | 58.7609   | 0.0000 | 0.8145  | up   |
| FBgn0039817 | CG15553  | 71    | 186   | 2.9285    | 7.7995    | 0.0000 | 1.3573  | up   |
| FBgn0026314 | Ugt35B1  | 48    | 704   | 2.0252    | 29.0830   | 0.0000 | 3.8249  | up   |
| FBgn0028513 | CG9254   | 24    | 2     | 1.2114    | 0.1027    | 0.0081 | -3.0140 | down |
| FBgn0013949 | Elal     | 710   | 1232  | 52.7954   | 86.0672   | 0.0000 | 0.7760  | up   |
| FBgn0028516 | ZnT35C   | 0     | 43    | 0.0000    | 1.8853    | 0.0000 | 5.2615  | up   |
| FBgn0038290 | CG6912   | 35    | 2451  | 1.5448    | 79.7932   | 0.0000 | 6.0663  | up   |
| FBgn0023076 | Clk      | 53    | 216   | 0.8978    | 3.9597    | 0.0000 | 1.9859  | up   |
| FBgn0034491 | Hsl      | 1268  | 717   | 24.5923   | 13.9265   | 0.0000 | -0.8396 | down |
| FBgn0039730 | CG7903   | 1160  | 780   | 51.9405   | 34.7737   | 0.0020 | -0.5900 | down |
| FBgn0039311 | CG10513  | 66    | 137   | 4.0205    | 8.1970    | 0.0053 | 1.0229  | up   |
| FBgn0261402 | Ir75b    | 36    | 0     | 1.3146    | 0.0000    | 0.0000 | -5.0300 | down |
| FBgn0028473 | Non1     | 6983  | 10653 | 213.5580  | 321.4334  | 0.0004 | 0.5911  | up   |
| FBgn0038194 | Cyp6d5   | 5468  | 8135  | 228.4790  | 339.8060  | 0.0018 | 0.5549  | up   |
| FBgn0036259 | CG9760   | 158   | 79    | 6.3025    | 3.1604    | 0.0020 | -1.0076 | down |
| FBgn0038337 | CG6125   | 655   | 360   | 23.5266   | 12.7502   | 0.0000 | -0.8795 | down |
| FBgn0033868 | S-Lap7   | 44    | 6     | 1.5779    | 0.2244    | 0.0000 | -2.6762 | down |
| FBgn0037898 | Dtd      | 35    | 96    | 9.0491    | 24.6405   | 0.0005 | 1.4086  | up   |
| FBgn0038751 | CG4770   | 0     | 30    | 0.0463    | 1.4584    | 0.0000 | 4.7583  | up   |
| FBgn0029639 | CG14419  | 1011  | 633   | 135.3040  | 83.0499   | 0.0001 | -0.6926 | down |
| FBgn0015040 | Cyp9c1   | 713   | 458   | 27.9507   | 17.7195   | 0.0010 | -0.6554 | down |
| FBgn0024987 | ssx      | 2008  | 4383  | 35.4420   | 81.8223   | 0.0000 | 1.1076  | up   |
| FBgn0038799 | MFS9     | 601   | 927   | 26.0704   | 39.0021   | 0.0022 | 0.6061  | up   |
| FBgn0052282 | Drs14    | 2416  | 449   | 2172.4500 | 411.0030  | 0.0000 | -2.4429 | down |
| FBgn0032109 | CG17005  | 115   | 366   | 3.9009    | 11.9492   | 0.0000 | 1.6424  | up   |
| FBgn0031728 | Hsp60C   | 22    | 1     | 0.7161    | 0.0336    | 0.0048 | -3.4452 | down |
| FBgn0036680 | Cpr73D   | 733   | 326   | 22.8081   | 9.6567    | 0.0000 | -1.1842 | down |
| FBgn0036428 | Gbs-70E  | 1676  | 2539  | 34.0676   | 54.6427   | 0.0008 | 0.5808  | up   |
| FBgn0050026 | CG30026  | 122   | 229   | 11.4823   | 21.4680   | 0.0015 | 0.8842  | up   |
| FBgn0085736 | CG40472  | 366   | 199   | 103.8330  | 58.4688   | 0.0000 | -0.8934 | down |
| FBgn0051326 | CG31326  | 1189  | 2152  | 51.1451   | 91.6146   | 0.0000 | 0.8372  | up   |
| FBgn0032387 | CG16965  | 139   | 282   | 4.0736    | 8.2633    | 0.0000 | 0.9966  | up   |
| FBgn0053696 | CNMaR    | 200   | 389   | 4.3328    | 8.5408    | 0.0000 | 0.9377  | up   |
| FBgn0027578 | Nep121   | 1126  | 2134  | 28.9744   | 54.4736   | 0.0000 | 0.9035  | up   |
| FBgn0001229 | Hsp67Bc  | 195   | 87    | 15.6206   | 6.9576    | 0.0000 | -1.1719 | down |
| FBgn0031110 | Obp19b   | 1141  | 405   | 211.2960  | 73.8451   | 0.0000 | -1.5098 | down |
| FBgn0036116 | CG7888   | 1098  | 1707  | 42.2209   | 66.7482   | 0.0003 | 0.6179  | up   |
| FBgn0053774 | CG33774  | 29    | 4     | 39.4051   | 5.5292    | 0.0081 | -2.5667 | down |
| FBgn0039315 | CG13658  | 403   | 115   | 19.5552   | 2.8773    | 0.0000 | -1.8170 | down |
| FBgn0032701 | CG10341  | 139   | 377   | 4.9257    | 13.3365   | 0.0000 | 1.4140  | up   |
| FBgn0014865 | Mtk      | 59    | 14    | 148.7220  | 36.5088   | 0.0001 | -2.0070 | down |
| FBgn0033936 | Achl     | 2023  | 3108  | 27.7857   | 43.0794   | 0.0003 | 0.6011  | up   |
| FBgn0033051 | Strica   | 97    | 13    | 2.4790    | 0.3088    | 0.0000 | -2.8120 | down |
| FBgn0033395 | Cyp4p2   | 186   | 24    | 7.2373    | 0.9623    | 0.0000 | -2.9135 | down |
| FBgn0027259 | Knn1     | 116   | 39    | 6.6604    | 3.1325    | 0.0000 | -1.5628 | down |
| FBgn0010401 | Os-C     | 158   | 43    | 41.5195   | 11.0305   | 0.0000 | -1.8679 | down |
| FBgn0038631 | CG7695   | 545   | 295   | 77.9096   | 42.3523   | 0.0000 | -0.9011 | down |
| FBgn0040629 | CAH5     | 574   | 1145  | 43.8587   | 86.6098   | 0.0000 | 0.9767  | up   |
| FBgn0038525 | CG14329  | 44    | 6     | 3.4196    | 0.4644    | 0.0000 | -2.6762 | down |
| FBgn0040923 | CG11368  | 4969  | 2975  | 3680.8840 | 2148.5310 | 0.0000 | -0.7580 | down |
| FBgn0035344 | Cyp4d20  | 813   | 1281  | 30.6042   | 47.2614   | 0.0003 | 0.6371  | up   |
| FBgn0005664 | Crys     | 249   | 112   | 8.2870    | 3.5879    | 0.0000 | -1.1626 | down |
| FBgn0051344 | CG31344  | 550   | 1013  | 32.0518   | 56.8115   | 0.0000 | 0.8617  | up   |
| FBgn0050285 | CG30285  | 295   | 89    | 59.3368   | 18.0734   | 0.0000 | -1.7340 | down |
| FBgn0024293 | Spn43Ab  | 3247  | 4948  | 175.4288  | 261.4623  | 0.0004 | 0.5894  | up   |
| FBgn0035022 | CG11413  | 24    | 78    | 4.0844    | 12.5542   | 0.0003 | 1.6367  | up   |
| FBgn0034733 | CG4752   | 436   | 790   | 7.2286    | 12.8193   | 0.0000 | 0.8377  | up   |
| FBgn0040091 | Ugt317A1 | 136   | 299   | 5.4085    | 12.1807   | 0.0000 | 1.1119  | up   |
| FBgn0038172 | Adgf-D   | 550   | 1327  | 25.9314   | 61.6228   | 0.0000 | 1.2508  | up   |
| FBgn0085350 | inaF-C   | 12382 | 18335 | 271.4827  | 407.7817  | 0.0036 | 0.5482  | up   |
| FBgn0030593 | CG9512   | 4382  | 6914  | 138.0280  | 217.5518  | 0.0000 | 0.6397  | up   |
| FBgn0262029 | d        | 81    | 21    | 1.0166    | 0.2596    | 0.0000 | -1.9088 | down |
| FBgn0051205 | CG31205  | 365   | 1793  | 30.5671   | 139.7040  | 0.0000 | 2.2747  | up   |
| FBgn0036910 | Cyp305a1 | 662   | 1516  | 30.0883   | 67.4798   | 0.0000 | 1.1759  | up   |
| FBgn0038071 | Dtg      | 45    | 133   | 1.1969    | 3.5361    | 0.0000 | 1.5217  | up   |
| FBgn0029863 | CG3823   | 374   | 131   | 20.5303   | 7.0932    | 0.0000 | -1.5234 | down |
| FBgn0267348 | LanB2    | 302   | 722   | 3.3644    | 7.8859    | 0.0000 | 1.2362  | up   |
| FBgn0012036 | Aldh     | 9037  | 13586 | 328.7940  | 486.7370  | 0.0011 | 0.5700  | up   |
| FBgn0020908 | Scp1     | 378   | 227   | 30.9765   | 19.6500   | 0.0013 | -0.7509 | down |
| FBgn0036834 | CG6836   | 251   | 417   | 19.6740   | 31.7801   | 0.0023 | 0.7117  | up   |
| FBgn0040064 | yip2     | 1808  | 2851  | 103.0400  | 160.1650  | 0.0001 | 0.6386  | up   |
| FBgn0030575 | CG5321   | 464   | 719   | 23.5896   | 34.5269   | 0.0040 | 0.6125  | up   |
| FBgn0029990 | CG2233   | 14330 | 30383 | 724.1220  | 1537.7600 | 0.0000 | 1.0660  | up   |
| FBgn0016684 | NaPi-T   | 27    | 3     | 0.7363    | 0.0819    | 0.0064 | -2.7790 | down |
| FBgn0030482 | CG1673   | 324   | 665   | 9.2589    | 18.8877   | 0.0000 | 1.0167  | up   |
| FBgn0026056 | Rlip     | 1416  | 910   | 36.8913   | 23.8521   | 0.0001 | -0.6553 | down |
| FBgn0260474 | CG30002  | 317   | 579   | 13.0405   | 24.0249   | 0.0000 | 0.8487  | up   |
| FBgn0035187 | Trh      | 441   | 282   | 13.1536   | 8.2626    | 0.0062 | -0.6611 | down |
| FBgn0004865 | Eip78C   | 1063  | 677   | 22.1801   | 11.7507   | 0.0001 | -0.6681 | down |
| FBgn0035777 | CG8563   | 6     | 48    | 0.2039    | 1.7370    | 0.0000 | 2.7658  | up   |

|             |            |      |       |           |          |        |         |      |
|-------------|------------|------|-------|-----------|----------|--------|---------|------|
| FBgn0017558 | Pdk        | 2555 | 4666  | 53.1850   | 97.5217  | 0.0000 | 0.8504  | up   |
| FBgn0037798 | CG12817    | 169  | 91    | 11.7831   | 6.4655   | 0.0079 | -0.9028 | down |
| FBgn0052462 | CG32462    | 48   | 3     | 2.9477    | 0.1826   | 0.0000 | -3.5834 | down |
| FBgn0038654 | CG14298    | 201  | 362   | 23.3005   | 36.4176  | 0.0002 | 0.8271  | up   |
| FBgn0035484 | CG11594    | 1306 | 2081  | 47.6812   | 74.9664  | 0.0000 | 0.6535  | up   |
| FBgn0031519 | Fign       | 8    | 38    | 0.2406    | 1.0785   | 0.0099 | 2.0812  | up   |
| FBgn0038680 | Cyp12a5    | 367  | 103   | 14.7647   | 4.1480   | 0.0000 | -1.8397 | down |
| FBgn0032008 | CG14277    | 3615 | 2463  | 607.0240  | 431.4922 | 0.0009 | -0.5715 | down |
| FBgn0038180 | Chf5       | 50   | 178   | 1.6563    | 5.7562   | 0.0000 | 1.7906  | up   |
| FBgn0052551 | CG32551    | 83   | 13    | 33.4689   | 5.2612   | 0.0000 | -2.5900 | down |
| FBgn0052191 | CG32191    | 199  | 585   | 6.5156    | 18.7617  | 0.0000 | 1.5322  | up   |
| FBgn0033289 | CG2121     | 538  | 1406  | 20.6502   | 52.6156  | 0.0000 | 1.3659  | up   |
| FBgn0033742 | Nep110     | 143  | 253   | 4.5891    | 8.0769   | 0.0047 | 0.8001  | up   |
| FBgn0032638 | SPH93      | 318  | 5     | 13.1371   | 0.2128   | 0.0000 | -5.7153 | down |
| FBgn0034443 | cer        | 148  | 285   | 43.6779   | 85.1255  | 0.0001 | 0.9220  | up   |
| FBgn0003943 | Ubi-p63E   | 5097 | 8205  | 126.3493  | 221.7769 | 0.0000 | 0.6686  | up   |
| FBgn0000075 | amd        | 319  | 172   | 12.6548   | 6.2304   | 0.0001 | -0.9048 | down |
| FBgn0053207 | pxb        | 248  | 146   | 3.0237    | 1.9422   | 0.0077 | -0.7778 | down |
| FBgn0029828 | CG6067     | 709  | 1126  | 38.6157   | 60.3292  | 0.0003 | 0.6484  | up   |
| FBgn0035806 | PGRP-SD    | 424  | 891   | 53.6725   | 112.4120 | 0.0000 | 1.0512  | up   |
| FBgn0040099 | lectin-28C | 406  | 1004  | 8.6740    | 21.9190  | 0.0000 | 1.2857  | up   |
| FBgn0027932 | Akap200    | 2759 | 4097  | 63.2358   | 93.4624  | 0.0020 | 0.5521  | up   |
| FBgn0038912 | CG6656     | 2482 | 3697  | 124.5520  | 185.3810 | 0.0017 | 0.5565  | up   |
| FBgn0033543 | CG12338    | 894  | 1330  | 62.7812   | 92.4172  | 0.0055 | 0.5544  | up   |
| FBgn0039759 | CG9733     | 51   | 153   | 2.5084    | 7.2687   | 0.0000 | 1.5458  | up   |
| FBgn0010383 | Cyp18a1    | 621  | 1182  | 14.9604   | 29.7907  | 0.0000 | 0.9092  | up   |
| FBgn0001125 | Got2       | 3945 | 6422  | 185.7321  | 294.5470 | 0.0000 | 0.6847  | up   |
| FBgn0038463 | CG3534     | 439  | 924   | 17.7746   | 30.8333  | 0.0000 | 1.0536  | up   |
| FBgn0005655 | PCNA       | 18   | 59    | 1.3877    | 4.3236   | 0.0047 | 1.6341  | up   |
| FBgn0260995 | dpr21      | 989  | 514   | 56.8868   | 30.9927  | 0.0000 | -0.9608 | down |
| FBgn0034885 | Egfp4      | 2961 | 4537  | 248.9876  | 367.5933 | 0.0003 | 0.5973  | up   |
| FBgn0032782 | Rab9       | 821  | 1234  | 37.4777   | 55.4386  | 0.0038 | 0.5691  | up   |
| FBgn0050197 | CG30197    | 4306 | 2850  | 1219.6900 | 815.4460 | 0.0001 | -0.6133 | down |
| FBgn0000592 | Est-6      | 4433 | 6978  | 166.2002  | 263.9778 | 0.0000 | 0.6363  | up   |
| FBgn0037519 | CG3014     | 5540 | 3242  | 88.5247   | 53.5642  | 0.0000 | -0.7909 | down |
| FBgn0036759 | CG5577     | 570  | 971   | 30.0182   | 54.8645  | 0.0000 | 0.7492  | up   |
| FBgn0005613 | Sox15      | 141  | 72    | 2.5126    | 1.2674   | 0.0081 | -0.9765 | down |
| FBgn0037850 | CG14695    | 60   | 13    | 4.6197    | 0.9915   | 0.0000 | -2.1293 | down |
| FBgn0064237 | ldgf5      | 531  | 953   | 26.5298   | 51.7461  | 0.0000 | 0.8243  | up   |
| FBgn0035855 | CG7366     | 176  | 68    | 3.4967    | 1.3651   | 0.0000 | -1.3752 | down |
| FBgn0039611 | Nep118     | 509  | 1001  | 16.4813   | 32.1253  | 0.0000 | 0.9560  | up   |
| FBgn0041604 | dlp        | 733  | 1396  | 11.7752   | 22.5577  | 0.0000 | 0.9102  | up   |
| FBgn0025712 | CG13920    | 1011 | 654   | 78.9001   | 51.4371  | 0.0004 | -0.6456 | down |
| FBgn0037624 | CG8223     | 354  | 148   | 13.1632   | 4.6850   | 0.0000 | -1.2697 | down |
| FBgn0038181 | CG9297     | 6129 | 3778  | 89.7369   | 54.9804  | 0.0000 | -0.7160 | down |
| FBgn0038929 | CG13408    | 181  | 98    | 11.2272   | 6.0203   | 0.0056 | -0.8955 | down |
| FBgn0021795 | Tapdelta   | 1028 | 1732  | 132.6910  | 220.0990 | 0.0000 | 0.7338  | up   |
| FBgn0038589 | CG18598    | 155  | 341   | 105.4640  | 231.6120 | 0.0000 | 1.1137  | up   |
| FBgn0033287 | CG8701     | 25   | 0     | 1.8819    | 0.0000   | 0.0001 | -4.5232 | down |
| FBgn0051414 | Gba1b      | 345  | 696   | 10.5616   | 21.2493  | 0.0000 | 0.9920  | up   |
| FBgn0039820 | CG15554    | 9    | 42    | 1.0586    | 4.6343   | 0.0041 | 2.0717  | up   |
| FBgn0020236 | ATPCL      | 5838 | 8564  | 94.2795   | 136.9460 | 0.0044 | 0.5346  | up   |
| FBgn0003060 | CG9757     | 24   | 2     | 2.2390    | 0.1805   | 0.0081 | -3.0140 | down |
| FBgn0030362 | regucalcin | 3786 | 5738  | 247.6741  | 365.5751 | 0.0005 | 0.5816  | up   |
| FBgn0001225 | Hsp26      | 209  | 107   | 16.6017   | 8.3762   | 0.0004 | -0.9764 | down |
| FBgn0035943 | CG5653     | 405  | 129   | 22.7485   | 7.1534   | 0.0000 | -1.6599 | down |
| FBgn0035791 | CG8539     | 178  | 60    | 10.2051   | 3.1938   | 0.0000 | -1.5687 | down |
| FBgn0002542 | lds        | 50   | 120   | 0.9127    | 2.1611   | 0.0007 | 1.2262  | up   |
| FBgn0050101 | Vajk4      | 71   | 170   | 3.6569    | 8.7059   | 0.0000 | 1.2283  | up   |
| FBgn0035160 | hng3       | 168  | 86    | 9.3920    | 4.5393   | 0.0023 | -0.9747 | down |
| FBgn0261575 | tobi       | 834  | 2621  | 30.0140   | 93.0186  | 0.0000 | 1.6325  | up   |
| FBgn0035770 | pst        | 5204 | 7862  | 144.9126  | 217.6380 | 0.0007 | 0.5770  | up   |
| FBgn0010039 | GstD3      | 57   | 184   | 7.5617    | 24.1125  | 0.0000 | 1.6531  | up   |
| FBgn0053143 | CG33143    | 3052 | 1425  | 37.7383   | 14.5568  | 0.0000 | -1.1163 | down |
| FBgn0038214 | CG9616     | 10   | 87    | 1.6066    | 3.3911   | 0.0000 | 2.9665  | up   |
| FBgn0036765 | CG7408     | 325  | 191   | 8.2109    | 4.6357   | 0.0014 | -0.7814 | down |
| FBgn0037126 | CG14567    | 199  | 569   | 26.8682   | 76.5213  | 0.0000 | 1.4922  | up   |
| FBgn0038467 | AdSL       | 403  | 714   | 11.4173   | 19.9439  | 0.0000 | 0.8053  | up   |
| FBgn0039049 | CG6726     | 98   | 197   | 4.7481    | 9.4271   | 0.0006 | 0.9810  | up   |
| FBgn0038926 | CG13409    | 1108 | 746   | 40.3789   | 26.6176  | 0.0024 | -0.5881 | down |
| FBgn0031529 | CG9662     | 190  | 331   | 22.9233   | 40.3864  | 0.0015 | 0.7791  | up   |
| FBgn0004045 | Yp1        | 11   | 54    | 0.5450    | 2.4710   | 0.0001 | 2.1659  | up   |
| FBgn0037683 | CG18473    | 8    | 427   | 0.5088    | 24.8515  | 0.0000 | 5.5322  | up   |
| FBgn0036337 | Adk2       | 2255 | 3469  | 104.6941  | 168.1273 | 0.0002 | 0.6030  | up   |
| FBgn0052251 | Claspin    | 283  | 27    | 3.1518    | 0.3029   | 0.0000 | -3.3535 | down |
| FBgn0052823 | Sdic3      | 121  | 0     | 3.8169    | 0.0000   | 0.0000 | -6.7476 | down |
| FBgn0039313 | CG11892    | 333  | 807   | 14.7167   | 30.9515  | 0.0000 | 1.2561  | up   |
| FBgn0033215 | Dgat2      | 56   | 145   | 3.8225    | 9.6985   | 0.0000 | 1.3368  | up   |
| FBgn0037105 | SIP        | 321  | 532   | 5.8730    | 9.8820   | 0.0007 | 0.7087  | up   |
| FBgn0038098 | CG7381     | 439  | 243   | 9.8983    | 5.4709   | 0.0000 | -0.8683 | down |
| FBgn0030968 | CG7322     | 800  | 1528  | 78.3658   | 145.8649 | 0.0000 | 0.9145  | up   |
| FBgn0030071 | CG12661    | 21   | 0     | 0.8932    | 0.0000   | 0.0009 | -4.2836 | down |
| FBgn0002719 | Men        | 6833 | 12398 | 211.7584  | 375.5319 | 0.0000 | 0.8413  | up   |
| FBgn0034321 | CG14502    | 50   | 11    | 3.1675    | 1.3642   | 0.0005 | -2.0914 | down |
| FBgn0051207 | CG31207    | 323  | 555   | 30.6995   | 52.9773  | 0.0001 | 0.7607  | up   |
| FBgn0035239 | CG18170    | 111  | 12    | 1.5755    | 0.1341   | 0.0000 | -3.1101 | down |
| FBgn0039900 | Syt7       | 2777 | 1688  | 53.7442   | 34.4212  | 0.0000 | -0.7359 | down |
| FBgn0035189 | CG9119     | 341  | 764   | 21.9205   | 47.8648  | 0.0000 | 1.1430  | up   |
| FBgn0039031 | Gbp3       | 780  | 1242  | 78.9333   | 123.5100 | 0.0002 | 0.6522  | up   |
| FBgn0262003 | CG42821    | 149  | 51    | 40.3586   | 9.3306   | 0.0000 | -1.5436 | down |
| FBgn0036659 | CG9701     | 317  | 710   | 11.6063   | 25.5602  | 0.0000 | 1.1424  | up   |
| FBgn0035197 | CG9130     | 26   | 1     | 0.6689    | 0.0459   | 0.0004 | -3.6753 | down |

|             |              |       |       |           |           |        |         |      |
|-------------|--------------|-------|-------|-----------|-----------|--------|---------|------|
| FBgn0038074 | Gnmt         | 635   | 2971  | 53.8011   | 247.0880  | 0.0000 | 2.2060  | up   |
| FBgn0014903 | CG14630      | 356   | 685   | 12.6950   | 29.8260   | 0.0000 | 0.9239  | up   |
| FBgn0031305 | Iris         | 1055  | 2039  | 43.6259   | 84.1758   | 0.0000 | 0.9317  | up   |
| FBgn0044812 | TotC         | 1001  | 255   | 206.4080  | 52.5780   | 0.0000 | -1.9861 | down |
| FBgn0011281 | Obp83a       | 352   | 190   | 39.2227   | 21.0242   | 0.0000 | -0.9036 | down |
| FBgn0028526 | CG15293      | 3944  | 5973  | 230.0297  | 347.1690  | 0.0005 | 0.5805  | up   |
| FBgn0039298 | to           | 873   | 395   | 56.1001   | 25.9544   | 0.0000 | -1.1599 | down |
| FBgn0030864 | CG8173       | 136   | 60    | 5.7615    | 2.5653    | 0.0004 | -1.1833 | down |
| FBgn0036255 | Atg12        | 87    | 178   | 25.4285   | 52.5963   | 0.0009 | 1.0052  | up   |
| FBgn0031873 | Gas41        | 92    | 177   | 10.6085   | 20.4677   | 0.0049 | 0.9175  | up   |
| FBgn0038301 | CG6654       | 691   | 1955  | 21.0712   | 58.9850   | 0.0000 | 1.4808  | up   |
| FBgn0028418 | Lk           | 127   | 57    | 22.7945   | 10.1638   | 0.0010 | -1.1579 | down |
| FBgn0030251 | CG2145       | 1836  | 2871  | 63.5187   | 97.1166   | 0.0001 | 0.6265  | up   |
| FBgn0000109 | Aprt         | 106   | 276   | 10.1931   | 26.4730   | 0.0000 | 1.3531  | up   |
| FBgn0040398 | CG14629      | 4751  | 7972  | 305.8920  | 499.7630  | 0.0000 | 0.7284  | up   |
| FBgn0025709 | CNT2         | 64    | 20    | 2.3643    | 0.7351    | 0.0018 | -1.6409 | down |
| FBgn0027783 | SMC2         | 200   | 111   | 2.8811    | 1.6221    | 0.0055 | -0.8609 | down |
| FBgn0035607 | CG4835       | 78    | 2     | 1.3684    | 0.0355    | 0.0000 | -4.6686 | down |
| FBgn0016078 | wun          | 1175  | 760   | 51.4612   | 33.7336   | 0.0003 | -0.6459 | down |
| FBgn0033458 | Lime         | 26    | 106   | 0.8429    | 3.3415    | 0.0000 | 1.9632  | up   |
| FBgn0259794 | sinah        | 38    | 6     | 2.1546    | 0.3354    | 0.0008 | -2.4704 | down |
| FBgn0058191 | CG40191      | 933   | 1421  | 43.4124   | 61.7245   | 0.0015 | 0.5882  | up   |
| FBgn0040502 | CG8343       | 20032 | 31947 | 2926.5300 | 4590.3200 | 0.0000 | 0.6552  | up   |
| FBgn0262717 | Skeletor     | 219   | 503   | 5.1950    | 11.5485   | 0.0000 | 1.1773  | up   |
| FBgn0051548 | CG31548      | 605   | 1157  | 58.0815   | 109.1810  | 0.0000 | 0.9160  | up   |
| FBgn0263077 | CG43340      | 10236 | 15678 | 131.5099  | 195.7888  | 0.0003 | 0.5969  | up   |
| FBgn0003507 | srp          | 1198  | 1895  | 36.6555   | 56.3818   | 0.0001 | 0.6429  | up   |
| FBgn0051704 | CG31704      | 109   | 230   | 29.8370   | 63.7212   | 0.0000 | 1.0514  | up   |
| FBgn0033631 | Sod3         | 946   | 1450  | 62.9127   | 110.6190  | 0.0010 | 0.5974  | up   |
| FBgn0032587 | CG5953       | 650   | 380   | 9.8631    | 6.5869    | 0.0000 | -0.7907 | down |
| FBgn0033911 | VGAT         | 1827  | 1251  | 47.0336   | 32.1087   | 0.0023 | -0.5641 | down |
| FBgn0051973 | Cda5         | 1161  | 615   | 13.1873   | 6.8412    | 0.0000 | -0.9336 | down |
| FBgn0035392 | CG1271       | 287   | 509   | 12.1342   | 20.7411   | 0.0000 | 0.8060  | up   |
| FBgn0038038 | Sccpdh2      | 905   | 1871  | 45.9722   | 93.4005   | 0.0000 | 1.0288  | up   |
| FBgn0036790 | AstC-R1      | 268   | 592   | 6.4986    | 14.6135   | 0.0000 | 1.1219  | up   |
| FBgn0036463 | Reck         | 274   | 165   | 4.2703    | 2.5642    | 0.0087 | -0.7458 | down |
| FBgn0052212 | CG32212      | 26    | 0     | 3.9824    | 0.0000    | 0.0000 | -4.5774 | down |
| FBgn0002565 | Lsp2         | 1455  | 11203 | 48.5729   | 369.5600  | 0.0000 | 2.9257  | up   |
| FBgn0085484 | Pdxk         | 709   | 1143  | 34.4604   | 55.3265   | 0.0001 | 0.6700  | up   |
| FBgn0032821 | CdGAPr       | 2153  | 1312  | 18.9774   | 11.4315   | 0.0000 | -0.7322 | down |
| FBgn0038676 | CG6026       | 38    | 6     | 0.4466    | 0.0703    | 0.0008 | -2.4704 | down |
| FBgn0036549 | CG10516      | 492   | 971   | 28.2636   | 54.8455   | 0.0000 | 0.9611  | up   |
| FBgn0034647 | pirk         | 58    | 178   | 3.0678    | 9.2781    | 0.0000 | 1.5809  | up   |
| FBgn0052368 | CG32368      | 49    | 14    | 25.8182   | 7.4584    | 0.0087 | -1.7446 | down |
| FBgn0033312 | CG8642       | 50    | 138   | 1.9193    | 5.1544    | 0.0000 | 1.4261  | up   |
| FBgn0035915 | S-Lap1       | 133   | 39    | 4.5591    | 1.3238    | 0.0000 | -1.7583 | down |
| FBgn0039094 | CG10184      | 196   | 396   | 12.5557   | 24.9830   | 0.0000 | 0.9924  | up   |
| FBgn0051380 | CG31380      | 1     | 23    | 0.1102    | 1.3476    | 0.0033 | 3.4805  | up   |
| FBgn0028374 | Hug          | 1358  | 928   | 116.6180  | 78.4497   | 0.0033 | -0.5668 | down |
| FBgn0030558 | CG1461       | 5158  | 8449  | 186.0267  | 298.2958  | 0.0000 | 0.6937  | up   |
| FBgn0039099 | GILT2        | 202   | 362   | 33.3968   | 59.2135   | 0.0003 | 0.8200  | up   |
| FBgn0032283 | CG7296       | 1688  | 1057  | 157.3180  | 96.4939   | 0.0000 | -0.6929 | down |
| FBgn0014455 | Ahcy         | 1330  | 1982  | 61.9562   | 88.6599   | 0.0028 | 0.5570  | up   |
| FBgn0037265 | spartin      | 803   | 410   | 26.6609   | 13.3048   | 0.0000 | -0.9859 | down |
| FBgn0033879 | Echs1        | 1769  | 2997  | 146.8059  | 243.2401  | 0.0000 | 0.7421  | up   |
| FBgn0037167 | CG11425      | 189   | 51    | 17.3761   | 4.6711    | 0.0000 | -1.8844 | down |
| FBgn0028499 | CG7985       | 605   | 396   | 17.3924   | 11.0798   | 0.0043 | -0.6281 | down |
| FBgn0031490 | CG17264      | 118   | 13    | 3.0623    | 0.3358    | 0.0000 | -3.0918 | down |
| FBgn0040653 | Dso1         | 1020  | 682   | 286.7336  | 199.0589  | 0.0021 | -0.5980 | down |
| FBgn0051769 | CG31769      | 1481  | 2289  | 98.3529   | 153.3720  | 0.0003 | 0.6096  | up   |
| FBgn0037222 | CG14642      | 6     | 71    | 0.3667    | 3.9465    | 0.0000 | 3.3196  | up   |
| FBgn0032381 | Mal-B1       | 193   | 77    | 7.8064    | 3.1010    | 0.0000 | -1.3309 | down |
| FBgn0028396 | TotA         | 2534  | 1454  | 513.2360  | 295.9540  | 0.0000 | -0.8190 | down |
| FBgn0034717 | CG5819       | 289   | 483   | 5.8780    | 9.6280    | 0.0008 | 0.7206  | up   |
| FBgn0039629 | CG11842      | 353   | 172   | 26.3290   | 12.7260   | 0.0000 | -1.0504 | down |
| FBgn0036262 | CG6910       | 2913  | 6282  | 141.3196  | 304.0246  | 0.0000 | 1.0903  | up   |
| FBgn0001124 | Got1         | 2930  | 5229  | 127.4722  | 222.2448  | 0.0000 | 0.8173  | up   |
| FBgn0263199 | Galk         | 1968  | 3054  | 65.5648   | 97.5760   | 0.0002 | 0.6156  | up   |
| FBgn0004654 | Pgd          | 1761  | 3053  | 78.7070   | 132.2511  | 0.0000 | 0.7753  | up   |
| FBgn0265606 | Prosalpha4T1 | 24    | 0     | 2.4938    | 0.0000    | 0.0001 | -4.4670 | down |
| FBgn0029831 | CG5966       | 1226  | 729   | 32.5401   | 19.4151   | 0.0000 | -0.7672 | down |
| FBgn0026403 | Ndg          | 478   | 104   | 6.9843    | 1.4783    | 0.0000 | -2.2061 | down |
| FBgn0031148 | Cbs          | 1279  | 1898  | 51.1176   | 74.0179   | 0.0037 | 0.5509  | up   |
| FBgn0033668 | exp          | 248   | 132   | 4.9732    | 2.8051    | 0.0003 | -0.9220 | down |
| FBgn0265416 | Neto         | 442   | 278   | 5.0398    | 3.3039    | 0.0033 | -0.6848 | down |
| FBgn0051407 | CG31407      | 5193  | 9860  | 31.6241   | 59.6250   | 0.0000 | 0.9067  | up   |
| FBgn0037415 | Osi8         | 65    | 17    | 4.3044    | 1.1306    | 0.0001 | -1.8835 | down |
| FBgn0031913 | CG5958       | 805   | 1369  | 48.6577   | 81.9393   | 0.0000 | 0.7471  | up   |
| FBgn0001223 | Hsp22        | 315   | 181   | 26.2077   | 15.0434   | 0.0008 | -0.8135 | down |
| FBgn0026602 | Adk3         | 730   | 1611  | 19.2991   | 40.4480   | 0.0000 | 1.1226  | up   |
| FBgn0040466 | Dlip2        | 221   | 101   | 21.2214   | 9.7741    | 0.0000 | -1.1389 | down |
| FBgn0033233 | Kdm4A        | 282   | 165   | 8.8849    | 5.2605    | 0.0029 | -0.7871 | down |
| FBgn0000489 | Pka-C3       | 2833  | 1908  | 52.8505   | 36.1638   | 0.0005 | -0.5881 | down |
| FBgn0035227 | Im1I         | 3827  | 1953  | 51.8212   | 26.5618   | 0.0000 | -0.9882 | down |
| FBgn0034076 | Jhedup       | 186   | 71    | 7.6966    | 2.9248    | 0.0000 | -1.3931 | down |
| FBgn0058263 | MFS17        | 1065  | 627   | 45.4852   | 26.7534   | 0.0000 | -0.7813 | down |
| FBgn0040207 | kat80        | 1266  | 588   | 24.2018   | 11.6646   | 0.0000 | -1.1230 | down |
| FBgn0264848 | vih          | 392   | 235   | 21.6549   | 13.1272   | 0.0010 | -0.7535 | down |
| FBgn0002930 | nec          | 3270  | 4766  | 156.9420  | 223.2010  | 0.0058 | 0.5252  | up   |
| FBgn0032698 | CG10336      | 17    | 60    | 1.0914    | 3.6196    | 0.0016 | 1.7353  | up   |
| FBgn0035434 | Drs15        | 2365  | 668   | 1376.2400 | 389.9800  | 0.0000 | -1.8403 | down |
| FBgn0010388 | Dro          | 376   | 53    | 43.8350   | 6.3414    | 0.0000 | -2.8182 | down |

|             |            |       |       |           |          |        |         |      |
|-------------|------------|-------|-------|-----------|----------|--------|---------|------|
| FBgn0050052 | Obp49a     | 3153  | 2056  | 337.2180  | 216.8550 | 0.0001 | -0.6347 | down |
| FBgn0030576 | CG15890    | 311   | 511   | 7.4171    | 12.1312  | 0.0013 | 0.6963  | up   |
| FBgn0037410 | Osi2       | 100   | 651   | 5.1708    | 32.4709  | 0.0000 | 2.6708  | up   |
| FBgn0037779 | CG12811    | 214   | 354   | 18.0366   | 29.9086  | 0.0062 | 0.7050  | up   |
| FBgn0014019 | Rh5        | 16568 | 10326 | 1092.1810 | 667.4544 | 0.0000 | -0.7002 | down |
| FBgn0000045 | Act79B     | 1465  | 700   | 80.3457   | 36.8644  | 0.0000 | -1.0824 | down |
| FBgn0035252 | CG7970     | 487   | 794   | 44.9461   | 70.6957  | 0.0002 | 0.6858  | up   |
| FBgn0033153 | Gadd45     | 174   | 329   | 8.5749    | 15.9021  | 0.0001 | 0.8965  | up   |
| FBgn0037230 | Nep11      | 2571  | 3908  | 77.7532   | 116.7010 | 0.0005 | 0.5858  | up   |
| FBgn0029521 | Or1a       | 10    | 49    | 0.7220    | 3.4180   | 0.0005 | 2.1528  | up   |
| FBgn0041194 | Prat2      | 1371  | 3295  | 52.6390   | 125.1996 | 0.0000 | 1.2462  | up   |
| FBgn0053120 | CG33120    | 240   | 446   | 6.5918    | 12.4116  | 0.0000 | 0.8728  | up   |
| FBgn0038613 | Vha100-4   | 49    | 1     | 1.3115    | 0.0263   | 0.0000 | -4.5609 | down |
| FBgn0086704 | stops      | 4325  | 2533  | 137.9870  | 81.1854  | 0.0000 | -0.7897 | down |
| FBgn0085195 | CG34166    | 1183  | 1860  | 474.3607  | 804.1418 | 0.0001 | 0.6342  | up   |
| FBgn0039052 | CG6733     | 0     | 71    | 0.0561    | 4.1502   | 0.0000 | 5.9701  | up   |
| FBgn0038397 | CG10185    | 33    | 105   | 0.4014    | 1.2439   | 0.0000 | 1.6186  | up   |
| FBgn0034330 | BomS4      | 46    | 0     | 109.1500  | 0.0000   | 0.0000 | -5.3740 | down |
| FBgn0032864 | CG2493     | 984   | 1806  | 42.6534   | 77.0718  | 0.0000 | 0.8572  | up   |
| FBgn0024811 | Crk        | 2344  | 1422  | 84.5242   | 58.3586  | 0.0000 | -0.7387 | down |
| FBgn0027500 | spd-2      | 12    | 50    | 0.2092    | 0.8372   | 0.0018 | 1.9430  | up   |
| FBgn0004181 | Ebp        | 21    | 1     | 1.1916    | 0.0720   | 0.0089 | -3.3815 | down |
| FBgn0034276 | Sardh      | 154   | 313   | 3.7816    | 7.5410   | 0.0000 | 0.9998  | up   |
| FBgn0034166 | CG6472     | 146   | 43    | 7.1916    | 2.0761   | 0.0000 | -1.7548 | down |
| FBgn0031489 | CG17224    | 789   | 533   | 46.0986   | 30.9140  | 0.0070 | -0.5830 | down |
| FBgn0039800 | Npc2g      | 5313  | 3267  | 748.3860  | 370.7087 | 0.0000 | -0.7195 | down |
| FBgn0029588 | CR14798    | 15    | 56    | 1.4292    | 5.2039   | 0.0017 | 1.8063  | up   |
| FBgn0034406 | Jheh3      | 532   | 894   | 25.0959   | 41.6553  | 0.0000 | 0.7295  | up   |
| FBgn0031538 | CG3246     | 1020  | 2103  | 57.4110   | 116.9730 | 0.0000 | 1.0249  | up   |
| FBgn0038974 | CG5377     | 208   | 403   | 13.1743   | 25.1376  | 0.0000 | 0.9323  | up   |
| FBgn0015037 | Cyp4p1     | 730   | 1598  | 27.3007   | 59.7745  | 0.0000 | 1.1110  | up   |
| FBgn0036583 | CG13055    | 132   | 60    | 2.8024    | 1.3196   | 0.0010 | -1.1406 | down |
| FBgn0053926 | CG33926    | 174   | 2475  | 19.9944   | 279.4594 | 0.0000 | 3.8034  | up   |
| FBgn0034786 | CG13531    | 460   | 706   | 5.2276    | 7.9952   | 0.0064 | 0.5987  | up   |
| FBgn0034588 | CG9394     | 2407  | 4395  | 67.6084   | 120.0258 | 0.0000 | 0.8502  | up   |
| FBgn0033372 | CG13742    | 49    | 3     | 1.3171    | 0.0842   | 0.0000 | -3.6125 | down |
| FBgn0038821 | CG17267    | 118   | 31    | 6.2029    | 1.6549   | 0.0000 | -1.9078 | down |
| FBgn0029898 | CG14439    | 1181  | 1808  | 44.0734   | 66.2385  | 0.0007 | 0.5958  | up   |
| FBgn0033730 | Cpr49Ag    | 330   | 591   | 56.4771   | 100.5320 | 0.0000 | 0.8204  | up   |
| FBgn0003888 | betaTub60D | 469   | 261   | 12.9204   | 6.9864   | 0.0000 | -0.8608 | down |
| FBgn0034191 | CG6984     | 83    | 170   | 6.4979    | 13.3198  | 0.0013 | 1.0063  | up   |
| FBgn0033953 | CG12861    | 22    | 1     | 1.4681    | 0.0668   | 0.0048 | -3.4452 | down |
| FBgn0002570 | Mal-A1     | 270   | 128   | 10.7445   | 4.9827   | 0.0000 | -1.0881 | down |
| FBgn0030439 | CG12716    | 118   | 17    | 5.2747    | 0.9081   | 0.0000 | -2.7326 | down |
| FBgn0053296 | CG33296    | 305   | 146   | 11.3060   | 5.2926   | 0.0000 | -1.0750 | down |
| FBgn0031320 | CG5126     | 245   | 474   | 10.6273   | 20.1414  | 0.0000 | 0.9308  | up   |
| FBgn0038740 | CG4562     | 559   | 964   | 5.5171    | 9.5537   | 0.0000 | 0.7668  | up   |
| FBgn0034328 | BomBc1     | 873   | 1     | 284.5320  | 0.3325   | 0.0000 | -8.6848 | down |
| FBgn0041180 | Tep4       | 8495  | 3111  | 113.3972  | 41.0786  | 0.0000 | -1.4670 | down |
| FBgn0039332 | alrm       | 854   | 2042  | 34.6729   | 82.9342  | 0.0000 | 1.2384  | up   |
| FBgn0039152 | Root       | 997   | 510   | 8.0269    | 4.0921   | 0.0000 | -0.9836 | down |
| FBgn0053080 | CG33080    | 1561  | 2388  | 39.4501   | 58.4688  | 0.0005 | 0.5948  | up   |
| FBgn0037643 | ScsbetaA   | 7641  | 11254 | 264.6441  | 387.6656 | 0.0038 | 0.5404  | up   |
| FBgn0004240 | DptA       | 440   | 159   | 106.9400  | 38.5307  | 0.0000 | -1.4799 | down |
| FBgn0037487 | thw        | 97    | 36    | 1.3810    | 0.5351   | 0.0003 | -1.4195 | down |
| FBgn0033052 | SCAP       | 1495  | 2602  | 18.3726   | 31.7406  | 0.0000 | 0.7809  | up   |
| FBgn0050489 | Cyp12d1-p  | 50    | 3     | 1.7878    | 0.1296   | 0.0000 | -3.6410 | down |
| FBgn0026755 | Ugt37B1    | 32    | 4     | 1.3719    | 0.1694   | 0.0016 | -2.7036 | down |
| FBgn0259896 | NimC1      | 348   | 677   | 10.4389   | 20.8915  | 0.0000 | 0.9397  | up   |
| FBgn0015527 | peng       | 1172  | 635   | 34.6743   | 16.4295  | 0.0000 | -0.9011 | down |
| FBgn0037488 | CG14607    | 37    | 0     | 2.1346    | 0.0000   | 0.0000 | -5.0684 | down |
| FBgn0040828 | CG13306    | 5     | 33    | 1.3190    | 7.6142   | 0.0047 | 2.4583  | up   |
| FBgn0030511 | CG11158    | 147   | 296   | 7.3970    | 14.6756  | 0.0000 | 0.9861  | up   |
| FBgn0038640 | CG7706     | 264   | 157   | 6.2217    | 3.7194   | 0.0073 | -0.7636 | down |
| FBgn0034802 | CNBP       | 1165  | 158   | 33.4198   | 3.7396   | 0.0000 | -2.8914 | down |
| FBgn0037405 | CG1077     | 46    | 9     | 1.3488    | 0.2648   | 0.0004 | -2.2334 | down |
| FBgn0037144 | CG7458     | 65    | 141   | 2.1855    | 4.6087   | 0.0015 | 1.0858  | up   |
| FBgn0034394 | CG15096    | 2185  | 3756  | 94.8129   | 160.4061 | 0.0000 | 0.7631  | up   |
| FBgn0050428 | CG30428    | 249   | 490   | 5.4484    | 13.0575  | 0.0000 | 0.9553  | up   |
| FBgn0034390 | CG15093    | 457   | 839   | 28.4771   | 50.6859  | 0.0000 | 0.8567  | up   |
| FBgn0031417 | CG3597     | 642   | 1252  | 45.6266   | 87.4264  | 0.0000 | 0.9442  | up   |
| FBgn0027560 | Tps1       | 11438 | 17105 | 315.0030  | 448.4580 | 0.0018 | 0.5624  | up   |
| FBgn0029823 | Shmt       | 1824  | 3651  | 82.8617   | 160.8339 | 0.0000 | 0.9826  | up   |
| FBgn0030001 | cyr        | 276   | 141   | 7.2935    | 3.6200   | 0.0000 | -0.9813 | down |
| FBgn0053978 | CG33978    | 687   | 428   | 4.9895    | 3.2605   | 0.0003 | -0.6993 | down |
| FBgn0053339 | CG33339    | 52    | 1     | 3.6132    | 0.0682   | 0.0000 | -4.6448 | down |
| FBgn0264343 | CG43799    | 2     | 36    | 0.2708    | 3.5607   | 0.0000 | 3.5480  | up   |
| FBgn0034144 | CG5089     | 21    | 1     | 0.8239    | 0.0396   | 0.0089 | -3.3815 | down |
| FBgn0035982 | CG4461     | 835   | 364   | 80.5107   | 34.6278  | 0.0000 | -1.2134 | down |
| FBgn0051664 | CG31664    | 161   | 61    | 5.4317    | 2.1000   | 0.0000 | -1.4015 | down |
| FBgn0002526 | LanA       | 617   | 1146  | 3.2235    | 5.9163   | 0.0000 | 0.8739  | up   |
| FBgn0052185 | edin       | 28    | 0     | 13.2033   | 0.0000   | 0.0000 | -4.6800 | down |
| FBgn0031701 | TotM       | 45    | 11    | 9.8711    | 2.4807   | 0.0044 | -1.9430 | down |
| FBgn0027279 | l(1)G0196  | 5207  | 8057  | 45.2970   | 68.7048  | 0.0001 | 0.6116  | up   |
| FBgn0036687 | CG6652     | 38    | 5     | 1.0719    | 0.1406   | 0.0002 | -2.6878 | down |
| FBgn0000299 | Col4a1     | 3125  | 4605  | 32.4506   | 46.8471  | 0.0031 | 0.5411  | up   |
| FBgn0027348 | bgm        | 772   | 521   | 19.0341   | 12.7693  | 0.0071 | -0.5844 | down |
| FBgn0052064 | S-Lap4     | 41    | 3     | 1.3855    | 0.1019   | 0.0000 | -3.3617 | down |
| FBgn0052687 | CG32687    | 1843  | 2940  | 52.8134   | 82.5729  | 0.0000 | 0.6553  | up   |
| FBgn0085452 | CG34423    | 420   | 790   | 71.1200   | 130.2667 | 0.0000 | 0.8915  | up   |
| FBgn0039114 | Lsd-1      | 2378  | 5492  | 124.0390  | 282.0339 | 0.0000 | 1.1891  | up   |
| FBgn0028540 | CG9008     | 386   | 600   | 12.8125   | 19.9532  | 0.0065 | 0.6168  | up   |

|                   |             |      |      |          |          |        |         |      |
|-------------------|-------------|------|------|----------|----------|--------|---------|------|
| FBgn0031564       | CG2816      | 36   | 5    | 9.0100   | 1.2565   | 0.0007 | -2.6121 | down |
| FBgn0015575       | alpha-Est7  | 3651 | 6590 | 126.8040 | 226.2020 | 0.0000 | 0.8337  | up   |
| FBgn0086778       | nAChRalpha7 | 4440 | 3121 | 43.2067  | 30.9940  | 0.0055 | -0.5265 | down |
| FBgn0034664       | CG4377      | 115  | 54   | 12.9180  | 6.1682   | 0.0064 | -1.0925 | down |
| FBgn0020385       | pug         | 3405 | 5536 | 99.9583  | 156.4658 | 0.0000 | 0.6829  | up   |
| FBgn0086691       | UK114       | 694  | 1039 | 122.2654 | 193.5988 | 0.0067 | 0.5633  | up   |
| FBgn0261714       | Cpn         | 3274 | 6009 | 94.6072  | 170.9010 | 0.0000 | 0.8577  | up   |
| FBgn0033501       | CG12911     | 21   | 1    | 1.0764   | 0.0507   | 0.0089 | -3.3815 | down |
| FBgn0037548       | CG7900      | 184  | 433  | 6.0179   | 14.1830  | 0.0000 | 1.2115  | up   |
| Trans_newGene_22  |             | 127  | 255  | 3.5934   | 9.0057   | 0.0001 | 0.9812  | up   |
| Trans_newGene_37  |             | 577  | 1    | 3.7022   | 0.0068   | 0.0000 | -8.0884 | down |
| Trans_newGene_79  |             | 113  | 264  | 1.3008   | 3.0465   | 0.0000 | 1.1979  | up   |
| Trans_newGene_85  |             | 18   | 114  | 0.3992   | 2.6183   | 0.0000 | 2.5710  | up   |
| Trans_newGene_87  |             | 309  | 1218 | 2.3419   | 9.3711   | 0.0000 | 1.9568  | up   |
| Trans_newGene_224 |             | 101  | 28   | 1.6735   | 0.4803   | 0.0000 | -1.8270 | down |
| Trans_newGene_310 |             | 23   | 0    | 0.4082   | 0.0000   | 0.0002 | -4.4084 | down |
| Trans_newGene_313 |             | 3    | 52   | 0.0495   | 0.8666   | 0.0000 | 3.6654  | up   |
| Trans_newGene_378 |             | 579  | 189  | 4.8005   | 1.6342   | 0.0000 | -1.6274 | down |
| Trans_newGene_383 |             | 173  | 70   | 1.9062   | 0.7912   | 0.0000 | -1.3094 | down |
| Trans_newGene_420 |             | 1149 | 2087 | 38.8670  | 70.0514  | 0.0000 | 0.8423  | up   |
