# Supplementary material for: Integrative Role of 14-3-3ε in Sleep Regulation
Source: Int J Mol Sci. 2021 Sep 9;22(18):9748. doi: 10.3390/ijms22189748 (PMC8467329; doi:10.3390/ijms22189748)
Supplement: Supplementary file 1 [file ijms-22-09748-s001.zip › Table S3 Neurotransmitter metabolism gene from Go onology analysis of transcriptome 20210722.pdf]

| Gene ID                                        |                                            | Mapped IDs  | Regulated |      | Gene Name                                             | Panther                                                           | Panther protein class      |
|------------------------------------------------|--------------------------------------------|-------------|-----------|------|-------------------------------------------------------|-------------------------------------------------------------------|----------------------------|
|                                                |                                            |             | ZT2       | ZT14 | Gene Symbol                                           | family/subfamily                                                  |                            |
| Tyrosine metabolic process                     | DROME FlyBase=FBgn0005626 UniProtKB=P18459 | FBgn0005626 | -         | down | Tyrosine 3-monooxygenase;ple                          | TYROSINE 3-MONOOXYGENASE (PTHR11473:SF15)                         |                            |
|                                                | DROME FlyBase=FBgn0001208 UniProtKB=P17276 | FBgn0001208 | -         | up   | Protein henna;Hn                                      | PHENYLALANINE-4-HYDROXYLASE (PTHR11473:SF24)                      |                            |
|                                                | DROME FlyBase=FBgn0040211 UniProtKB=Q9VKJ0 | FBgn0040211 | up        | up   | Homogentisate 1,2-dioxygenase;hgo                     | HOMOGENTISATE 1,2-DIOXYGENASE (PTHR11056:SF0)                     | oxygenase(PC00177)         |
|                                                | DROME FlyBase=FBgn0016013 UniProtKB=Q9VZI8 | FBgn0016013 | up        | up   | Fumarylacetoacetase;Faa                               | FUMARYLACETOACETASE (PTHR43069:SF2)                               |                            |
|                                                | DROME FlyBase=FBgn0036992 UniProtKB=Q9VPF3 | FBgn0036992 | up        | up   | 4-hydroxyphenylpyruvate dioxygenase;Hpd               | 4-HYDROXYPHENYLPYRUVATE DIOXYGENASE (PTHR11959:SF1)               | oxygenase(PC00177)         |
| Glutamin family amino acid biosynthetic prcess | DROME FlyBase=FBgn0001125 UniProtKB=Q8IPY3 | FBgn0001125 | -         | up   | Aspartate aminotransferase;Got2                       | ASPARTATE AMINOTRANSFERASE, MITOCHONDRIAL (PTHR11879:SF22)        |                            |
|                                                | DROME FlyBase=FBgn0001124 UniProtKB=A1ZAA5 | FBgn0001124 | up        | up   | Glutamate oxaloacetate transaminase 1, isoform B;Got1 | GLUTAMATE OXALOACETATE TRANSAMINASE 1, ISOFORM B (PTHR11879:SF55) |                            |
|                                                | DROME FlyBase=FBgn0026565 UniProtKB=O97069 | FBgn0026565 | -         | up   | Argininosuccinate synthase;Ass                        | ARGININOSUCCINATE SYNTHASE (PTHR11587:SF2)                        | ligase(PC00142)            |
|                                                | DROME FlyBase=FBgn0032076 UniProtKB=Q9VLG9 | FBgn0032076 | -         | up   | Uncharacterized protein, isoform B;Arg1               | ARGININOSUCCINATE LYASE (PTHR43814:SF1)                           | lyase(PC00144)             |
|                                                | DROME FlyBase=FBgn0038516 UniProtKB=Q9VEJ3 | FBgn0038516 | -         | up   | Pyrroline-5-carboxylate reductase;P5cr-2              | PYRROLINE-5-CARBOXYLATE REDUCTASE 2 (PTHR11645:SF0)               |                            |
| Serine family amino acid metabolic process     | DROME FlyBase=FBgn0014031 UniProtKB=Q9W3Z3 | FBgn0014031 | -         | up   | Serine--pyruvate aminotransferase;Spat                | SERINE--PYRUVATE AMINOTRANSFERASE (PTHR21152:SF24)                | transaminase(PC00216)      |
|                                                | DROME FlyBase=FBgn0032287 UniProtKB=Q9VKR4 | FBgn0032287 | -         | up   | Aminomethyltransferase;151967_at                      | AMINOMETHYLTRANSFERASE, MITOCHONDRIAL (PTHR43757:SF2)             | methyltransferase(PC00155) |
|                                                | DROME FlyBase=FBgn0039094 UniProtKB=Q9VCK6 | FBgn0039094 | -         | up   | LD34157p;DmelCG10184                                  | L-THREONINE ALDOLASE (PTHR48097:SF9)                              |                            |
|                                                | DROME FlyBase=FBgn0029823 UniProtKB=Q9W457 | FBgn0029823 | up        | up   | Serine hydroxymethyltransferase;Shmt                  | SERINE HYDROXYMETHYLTRANSFERASE, CYTOSOLIC (PTHR11680:SF21)       | methyltransferase(PC00155) |
|                                                | DROME FlyBase=FBgn0031148 UniProtKB=Q9VRD9 | FBgn0031148 | -         | up   | Cystathionine beta-synthase;Cbs                       | CYSTATHIONINE BETA-SYNTHASE (PTHR10314:SF8)                       | lyase(PC00144)             |
|                                                | DROME FlyBase=FBgn0037684 UniProtKB=Q9VHF0 | FBgn0037684 | -         | up   | LP08712p;Srr                                          | LP08712P (PTHR48078:SF6)                                          |                            |
