# Supplementary material for: Integrative Role of 14-3-3ε in Sleep Regulation
Source: Int J Mol Sci. 2021 Sep 9;22(18):9748. doi: 10.3390/ijms22189748 (PMC8467329; doi:10.3390/ijms22189748)
Supplement: Supplementary file 1 [file ijms-22-09748-s001.zip › Table S4 Primer sequence 20210722.xlsx]

## Sheet: Real-time PCR 
Real-time PCR
Primer Name	Primer Sequence	Tm	Position on Target	Length of the Amplicons	Amplification Efficiency	Accession Numbers
RP49-F	GACAGTATCTGATGCCCAACA	60	238-258	170bp	0.91	NM_079843.4
RP49-R	CTTCTTGGAGGAGACGCCGT	60	407-388
PDF-F	GAACGATGCGGGCAAGTAAG	57	369-388	157bp	0.98	NM_079793.3
PDF-R	CTACACCGGCTTTTATCTGCG	57	525-505
Ubx-F	GGTGAGTGTCCTGAAGAT	60	1702-1719	106bp	0.91	NM_080504.4
Ubx-R	CCGCAAGAGATTCTGAGTA	60	1807-1789

## Sheet: CHIP 
CHIP
Primer Name	Primer Sequence
PDF promoter-1F	CTCTGATGTGACCAAGACGCTC
PDF promoter-1R	ACTCCGACGATTTGTTTGCACTG
PDF promoter-2F	GGATTTTGGGTCTGGCCACA
PDF promoter-2R	AGTCACACAACGCACATCATCC
PDF promoter-3F	GCACGTGAAGTCATTGAACAGGC
PDF promoter-3R	GAACGTGTGAAAAGCGAAGGATTCC
PDF promoter-4F	CGCATACGACATGTGCAACAAC
PDF promoter-4R	AGTTCCACTTCCAGGAACAGGAC
PDF promoter-5F	TATTGAGGCTGCGCACACTG
PDF promoter-5R	GACCACGACGGACAGTGACA
PDF promoter-6F	TGTCACTGTCCGTCGTGGTC
PDF promoter-6R	TTCGCGCGGACGTAATTGG
PDF promoter-7F	TTGCTCTCGCCAATTACGTCC
PDF promoter-7R	TTGCTCAATTCGTTTTCTCTCTGTG
PDF promoter-8F	TACACAGAGAGAAAACGAATTGAGC
PDF promoter-8R	CAGGCACCAAATCCCATTCAA
PDF promoter-9F	GCCTTCCCGTACAAATATCGCTG
PDF promoter-9R	TAGCAACCTGGACTGGATAACCC
PDF promoter-10F	GATACTGACGCTCTTGGGTTGC
PDF promoter-10R	GGTACGTGTAGCGAGCCATTAG
